# Supplementary material for: Glucose Deprivation-Mediated Disulfide Stress Induces Cell Death in FHdeficient Renal Cell Carcinoma
Source: Research Square preprint supplement (doi:10.21203/rs.3.rs-5880350/v1), 2025-02-17
Supplement: Supplementary file 1 [file 05daf74b1486f5d5214b3e20.xlsx]

## Sheet: Sheet 1
Table S3 Top10 cell death
NAME		RE1	RE2	RE3	Target	Fold change	P-value
Rotenone (Barbasco)		0.202108	0.205493	0.190797	Complex I	0.199466	0.00702139
Daporinad (FK866, APO866)		0.214327	0.298786	0.291934	NMPRTase	0.268349	0.0161922
Fenofibrate		0.247764	0.246938	0.259983	P450	0.251562	0.00968897
Fipronil		0.176184	0.185844	0.178661	P450 ,GABA	0.18023	0.00750164
PKM-2-IN		0.20087	0.225225	0.247021	PKM2	0.224372	0.0115168
Antimycin A		0.163387	0.158103	0.160085	Complex III	0.160525	0.00682363
Cordycepin		0.191128	0.17057	0.155379	MMP	0.172359	0.0052718
Tamoxifen Citrate		0.235215	0.237196	0.295154	Estrogen Receptor (ER)/ERR	0.255855	0.013838
Gboxin		0.15992	0.152654	0.155379	ATP Synthase	0.155984	0.025693
HA15		0.245883	0.268257	0.262148	BiP/GRP78/HSPA5	0.258762	0.0312683
