# Supplementary material for: Glucose Deprivation-Mediated Disulfide Stress Induces Cell Death in FHdeficient Renal Cell Carcinoma
Source: Research Square preprint supplement (doi:10.21203/rs.3.rs-5880350/v1), 2025-02-17
Supplement: Supplementary file 2 [file 389c5bc55ebfb4a1673337c3.xlsx]

## Sheet: Sheet1
Talbe S1. Vecotr control vs Oe FH UOK262 upregulated cysteine-containing peptides
PTM.CollapseKey	PG.ProteinAccessions	PG.Genes	PG.ProteinDescriptions	PTM.ProteinId	PTM.Multiplicity	window	PTM.ModificationTitle	PTM.SiteAA	PTM.SiteLocation	PTM.FlankingRegion	[1].vector UOK262 1.PTM.SiteProbability	[2].vector UOK262 2.PTM.SiteProbability	[3].vector UOK262 3.PTM.SiteProbability	[4].oe FH UOK262 1.PTM.SiteProbability	[5].oe FH UOK262 2.PTM.SiteProbability	[6].oe FH UOK262 3.PTM.SiteProbability	vector UOK262 1	vector UOK262 2	vector UOK262 3	oe FH UOK262 1	oe FH UOK262 2	oe FH UOK262 3	ttestPvalue	FC	Log2FC	fdr	threshold
A0A023T695_C174_M1	A0A023T695;A0A024RA87;A4GYY8;B4DNE4;B4DPQ6;B4DUD6;E7EPK1;E7ES33;G3V1Q4;Q16181;Q3LIE9;Q8TC62	;SEPTIN7;DKFZp686F17268;;;;SEPTIN7;SEPTIN7;SEPTIN7;SEPTIN7;Nbla02942;SEPT7	Septin;Septin;Septin-7 (Fragment);Septin;Septin;Septin;Septin;Septin;Septin;Septin-7;Septin;Septin	A0A023T695	1	TLTPEECQQFKKQ	Carbamidomethyl (C)	C	174	DTLTPEECQQFKKQI	1	1	1	1	1	1	24626.3	17542.8	22432.3	7963.77	6630.75	10331.2	0.00495434	2.59175	1.37393	0.0421922	Up
A0A024QYS2_C428_M1	A0A024QYS2;Q96JZ5;Q9HD45	;SMBP;TM9SF3	Transmembrane 9 superfamily member;Transmembrane 9 superfamily member;Transmembrane 9 superfamily member 3	A0A024QYS2	1	GQPNFPCRVNAVP	Carbamidomethyl (C)	C	428	SGQPNFPCRVNAVPR	1	1	1	1		1	42683.5	48426.5	46586.9	27696.2	17979.8	22692.5	0.0021313	2.01404	1.01009	0.0257187	Up
A0A024QZT0_C47_M1	A0A024QZT0;A0A0A0MR02;P45880	VDAC2	Voltage-dependent anion-selective channel protein 2;Voltage-dependent anion-selective channel protein 2 (Fragment);Voltage-dependent anion-selective channel protein 2	A0A024QZT0	1	DVKTKSCSGVEFS	Carbamidomethyl (C)	C	47	LDVKTKSCSGVEFST	1	1	1	1	1	1	9828.61	19219.8	13700.2	4814.04	6593.59	7095.65	0.0452576	2.31033	1.2081	0.150659	Up
A0A024QZT0_C76_M1	A0A024QZT0;A0A0A0MR02;P45880	VDAC2	Voltage-dependent anion-selective channel protein 2;Voltage-dependent anion-selective channel protein 2 (Fragment);Voltage-dependent anion-selective channel protein 2	A0A024QZT0	1	ETKYKWCEYGLTF	Carbamidomethyl (C)	C	76	LETKYKWCEYGLTFT	1	1	1	1	1	1	43719.7	51555	42961.2	13158.1	22089.1	19673.5	0.00191803	2.51701	1.33171	0.0249052	Up
A0A024R324_C16_M1	A0A024R324;B4DKN9;P61586	RHOA;;RHOA	Transforming protein RhoA	A0A024R324	1	IVGDGACGKTCLL	Carbamidomethyl (C)	C	16	VIVGDGACGKTCLLI	1	1	1	1	1	1	53631.8	59345	50817.4	22994.6	24781.6	24314.3	0.000284053	2.27207	1.184	0.0115412	Up
A0A024R374_C319_M1	A0A024R374;A0A7I2V440;A0A7I2V668;A8K2H4;B4DL49;E9PHZ5;P07858	;CTSB;CTSB;;;CTSB;CTSB	Cathepsin B	A0A024R374	1	LRGQDHCGIESEV	Carbamidomethyl (C)	C	319	ILRGQDHCGIESEVV	1	1	1	1		1	84507	70969.9	69783	1095.78	3304.69	5514.37	0.000125506	22.7195	4.50586	0.00867311	Up
A0A024R374_C93_M1	A0A024R374;A0A7I2V440;A0A7I2V668;A8K2H4;B4DL49;E9PHZ5;P07858	;CTSB;CTSB;;;CTSB;CTSB	Cathepsin B	A0A024R374	1	REQWPQCPTIKEI	Carbamidomethyl (C)	C	93	AREQWPQCPTIKEIR	1	1	1		1	1	37300.7	38283.4	32572.9	10902.4	14138.8	18606.3	0.00164253	2.47796	1.30916	0.0242347	Up
A0A024R3X4_C237_M1	A0A024R3X4;P10809	HSPD1	60 kDa heat shock protein, mitochondrial (Fragment);60 kDa heat shock protein, mitochondrial	A0A024R3X4	1	TSKGQKCEFQDAY	Carbamidomethyl (C)	C	237	NTSKGQKCEFQDAYV	1	1	1	1	1	1	62684.5	67905.1	69188	26309.6	25685.3	25111.1	3.50676e-05	2.59095	1.37348	0.00516767	Up
A0A024R4K3_C93_M1	A0A024R4K3;P40926;Q0QF37;Q6FHZ0;Q75MT9	;MDH2;MDH2;MDH2;MDH2	Malate dehydrogenase;Malate dehydrogenase, mitochondrial;Malate dehydrogenase (Fragment);Malate dehydrogenase;Malate dehydrogenase (Fragment)	A0A024R4K3	1	PDCLKGCDVVVIP	Carbamidomethyl (C)	C	93	LPDCLKGCDVVVIPA	1	1	1	1	1	1	87362.6	111263	114859	65868.3	61320.9	70368.3	0.012784	1.5868	0.666121	0.0734247	Up
A0A024R5Q7_C182_M1	A0A024R5Q7;P30520	ADSS;ADSS2	Adenylosuccinate synthetase isozyme 2	A0A024R5Q7	1	RSGLRMCDLVSDF	Carbamidomethyl (C)	C	182	ARSGLRMCDLVSDFD	1	1	1	1	1	1	24541.3	36555.2	27503.9	9878.29	13547	10288.9	0.00852001	2.62799	1.39396	0.0609132	Up
A0A024R5Z7_C133_M1	A0A024R5Z7;P07355;V9HW65	ANXA2;ANXA2;HEL-S-270	Annexin;Annexin A2;Annexin	A0A024R5Z7	1	SLIEIICSRTNQE	Carbamidomethyl (C)	C	133	DSLIEIICSRTNQEL	1	1	1	1	1		14448.4	14147.7	17847.3	9956.17	10359.2	9590.57	0.0102788	1.55298	0.635042	0.0668162	Up
A0A024R713_C306_M1	A0A024R713;B4DFL1;P09622	;;DLD	Dihydrolipoyl dehydrogenase;Dihydrolipoyl dehydrogenase;Dihydrolipoyl dehydrogenase, mitochondrial	A0A024R713	1	KAEVITCDVLLVC	Carbamidomethyl (C)	C	306	GKAEVITCDVLLVCI	0.819831		0.8449	0.729606			6603.64	6822	8851.69	1097.3	1153.07	1037.04	0.000906238	6.77654	2.76055	0.0160353	Up
A0A024RA87_C151_M1	A0A023T695;A0A024RA87;A4GYY8;B4DNE4;B4DPQ6;B4DUD6;E7EPK1;E7ES33;G3V1Q4;Q16181;Q3LIE9;Q8TC62	;SEPTIN7;DKFZp686F17268;;;;SEPTIN7;SEPTIN7;SEPTIN7;SEPTIN7;Nbla02942;SEPT7	Septin;Septin;Septin-7 (Fragment);Septin;Septin;Septin;Septin;Septin;Septin;Septin-7;Septin;Septin	A0A024RA87	1	TLTPEECQQFKKQ	Carbamidomethyl (C)	C	151	DTLTPEECQQFKKQI	1	1	1	1	1	1	24626.3	17542.8	22432.3	7963.77	6630.75	10331.2	0.00495434	2.59175	1.37393	0.0421922	Up
A0A024RBB5_C25_M1	A0A024RBB5;Q16527	CSRP2	Cysteine and glycine-rich protein 2, isoform CRA_a;Cysteine and glycine-rich protein 2	A0A024RBB5	1	HAEEVQCDGRSFH	Carbamidomethyl (C)	C	25	YHAEEVQCDGRSFHR	1	1	1				50281.3	73959.7	54605.9	36828.9	23767.6	21164.6	0.0208273	2.18743	1.12924	0.0973654	Up
A0A024RCJ8_C611_M1	A0A024RCJ8;A0A0G2JHC2;A0A1U9X8C1;A0A1U9X8C7;A0A1U9X8D1;A0A1U9X8D3;Q6NYC8	;PPP1R18;;;;;PPP1R18	PPP1R18;PPP1R18;PPP1R18;PPP1R18;PPP1R18;PPP1R18;Phostensin	A0A024RCJ8	1	LIVDESCRR____	Carbamidomethyl (C)	C	611	ALIVDESCRR_____	1	1	1				27716.7	36695.5	25559.7	14479.1	8993.47	13456.3	0.00966728	2.43636	1.28473	0.0649877	Up
A0A024RCT1_C115_M1	A0A024RCT1;A0A0A0MSV9;A0A0G2JH37;A0A0G2JKZ1;A0A1U9X8L5;A0A8V8TP24;A0A8V8TQC5;A2AB90;C9JA35;O15533	;TAPBP;TAPBP;TAPBP;;TAPBP;TAPBP;TAPBP;TAPBP;TAPBP	Tapasin	A0A024RCT1	1	LTPAQNCPRALDG	Carbamidomethyl (C)	C	115	GLTPAQNCPRALDGA	1	1	1	1			68158.1	90622.3	70934.2	8633.48	3121	2934.41	0.000607721	15.6387	3.96705	0.0133036	Up
A0A087WUD3_C14_M1	A0A087WUD3;Q9NRP0	OSTC	Oligosaccharyltransferase complex subunit;Oligosaccharyltransferase complex subunit OSTC	A0A087WUD3	1	PFLVLECPNLKLK	Carbamidomethyl (C)	C	14	VPFLVLECPNLKLKK	1	1	1	1	1		8769.28	10617	12278.4	4262.24	2113.85	4935.73	0.00685387	2.79926	1.48505	0.0544325	Up
A0A087WVQ6_C463_M1	A0A087WVQ6;A0A8V8TQ14;A0A8V8TR47;A0A8V8TRF0;K7EJJ5;Q00610	CLTC	Clathrin heavy chain;Clathrin heavy chain;Clathrin heavy chain;Clathrin heavy chain;Clathrin heavy chain;Clathrin heavy chain 1	A0A087WVQ6	1	KEDKLECSEELGD	Carbamidomethyl (C)	C	463	LKEDKLECSEELGDL	1	1	1	1	1		97935.6	142646	117894	75123.2	68414.4	56725.6	0.0196751	1.79002	0.839979	0.0937327	Up
A0A087WVQ6_C874_M1	A0A087WVQ6;A0A8V8TQ14;A0A8V8TR47;A0A8V8TRF0;K7EJJ5;Q00610	CLTC	Clathrin heavy chain;Clathrin heavy chain;Clathrin heavy chain;Clathrin heavy chain;Clathrin heavy chain;Clathrin heavy chain 1	A0A087WVQ6	1	ARIHEGCEEPATH	Carbamidomethyl (C)	C	874	EARIHEGCEEPATHN	1	1	1	1		1	7323.48	8873.33	8510.14	2303.32	3865.01	898.935	0.00382685	3.49597	1.80569	0.0370233	Up
A0A087WY82_C50_M1	A0A087WY82;B7Z5W1;Q6FIB4;Q9Y5B2;Q9Y624	F11R;;F11R;;F11R	Junctional adhesion molecule A	A0A087WY82	1	NPVKLSCAYSGFS	Carbamidomethyl (C)	C	50	NNPVKLSCAYSGFSS	1	1	1				196327	172764	242134	6463.43	6644.58	5714.68	0.000633486	32.4728	5.02116	0.013437	Up
A0A087WYT3_C44_M1	A0A087WYT3;B3KUY2;Q15185	PTGES3	Prostaglandin E synthase 3	A0A087WYT3	1	SKLTFSCLGGSDN	Carbamidomethyl (C)	C	44	KSKLTFSCLGGSDNF	1	1	1	1	1	1	92417.3	118457	106467	65535.7	62241.4	51886	0.00587847	1.76631	0.820739	0.0486067	Up
A0A090N8P3_C271_M1	A0A090N8P3;B3KQQ0;O95302	FKBP9;;FKBP9	peptidylprolyl isomerase;peptidylprolyl isomerase;Peptidyl-prolyl cis-trans isomerase FKBP9	A0A090N8P3	1	KVVPENCERISQS	Carbamidomethyl (C)	C	271	NKVVPENCERISQSG	1	1	1	1	1	1	58146.1	64854.3	84951.2	12540.7	44541.4	20924.7	0.0257965	2.66582	1.41458	0.108625	Up
A0A0A0MR02_C47_M1	A0A024QZT0;A0A0A0MR02;P45880	VDAC2	Voltage-dependent anion-selective channel protein 2;Voltage-dependent anion-selective channel protein 2 (Fragment);Voltage-dependent anion-selective channel protein 2	A0A0A0MR02	1	DVKTKSCSGVEFS	Carbamidomethyl (C)	C	47	LDVKTKSCSGVEFST	1	1	1	1	1	1	9828.61	19219.8	13700.2	4814.04	6593.59	7095.65	0.0452576	2.31033	1.2081	0.150659	Up
A0A0A0MR02_C76_M1	A0A024QZT0;A0A0A0MR02;P45880	VDAC2	Voltage-dependent anion-selective channel protein 2;Voltage-dependent anion-selective channel protein 2 (Fragment);Voltage-dependent anion-selective channel protein 2	A0A0A0MR02	1	ETKYKWCEYGLTF	Carbamidomethyl (C)	C	76	LETKYKWCEYGLTFT	1	1	1	1	1	1	43719.7	51555	42961.2	13158.1	22089.1	19673.5	0.00191803	2.51701	1.33171	0.0249052	Up
A0A0A0MS51_C297_M1	A0A0A0MS51;A0A0A0MT01;A0A384MEF1;A0A8V8TND7;B7Z6N2;B7Z992;B7Z9A0;P06396	GSN;GSN;;GSN;;;;GSN	Gelsolin	A0A0A0MS51	1	ALKSEDCFILDHG	Carbamidomethyl (C)	C	297	GALKSEDCFILDHGK	1	1	1	1			19045.3	23749.8	20873	10867.9	6458.65	9634.61	0.00297597	2.36147	1.23969	0.0313966	Up
A0A0A0MSV9_C115_M1	A0A024RCT1;A0A0A0MSV9;A0A0G2JH37;A0A0G2JKZ1;A0A1U9X8L5;A0A8V8TP24;A0A8V8TQC5;A2AB90;C9JA35;O15533	;TAPBP;TAPBP;TAPBP;;TAPBP;TAPBP;TAPBP;TAPBP;TAPBP	Tapasin	A0A0A0MSV9	1	LTPAQNCPRALDG	Carbamidomethyl (C)	C	115	GLTPAQNCPRALDGA	1	1	1	1			68158.1	90622.3	70934.2	8633.48	3121	2934.41	0.000607721	15.6387	3.96705	0.0133036	Up
A0A0A0MT01_C316_M1	A0A0A0MS51;A0A0A0MT01;A0A384MEF1;A0A8V8TND7;B7Z6N2;B7Z992;B7Z9A0;P06396	GSN;GSN;;GSN;;;;GSN	Gelsolin	A0A0A0MT01	1	ALKSEDCFILDHG	Carbamidomethyl (C)	C	316	GALKSEDCFILDHGK	1	1	1	1			19045.3	23749.8	20873	10867.9	6458.65	9634.61	0.00297597	2.36147	1.23969	0.0313966	Up
A0A0A0MTI1_C511_M1	A0A0A0MTI1;B7ZAV4;Q15392;Q3LIE7	DHCR24;;DHCR24;Nbla03646	24-dehydrocholesterol reductase;cDNA, FLJ79318, highly similar to 24-dehydrocholesterol reductase;Delta(24)-sterol reductase;Uncharacterized protein Nbla03646	A0A0A0MTI1	1	LREKLGCQDAFPE	Carbamidomethyl (C)	C	511	KLREKLGCQDAFPEV							85164.6	90689.8	86696.6	44841	31087.2	34587.5	0.000337094	2.37569	1.24835	0.0115412	Up
A0A0C4DGS1_C128_M1	A0A0C4DGS1;P39656	DDOST	Dolichyl-diphosphooligosaccharide--protein glycosyltransferase 48 kDa subunit	A0A0C4DGS1	1	RELGSECGIEFDE	Carbamidomethyl (C)	C	128	LRELGSECGIEFDEE	1	1	1	1	1	1	73406.7	74023.4	64308.2	26171.3	22491.3	13912.4	0.000490843	3.38375	1.75862	0.0121466	Up
A0A0D9SF53_C223_M1	A0A0D9SF53;A0A0D9SFB3;A0A0D9SG12;A0A2R8Y4A4;A0A2R8Y5G6;A0A2R8Y645;A0A2R8Y774;A0A2R8YCW1;A0A2R8YF78;A0A2R8YFR4;A0A2R8YFS5;A0A2U3TZJ9;B5BTY4;O00571;Q59GX6	DDX3X;DDX3X;DDX3X;DDX3X;DDX3X;DDX3X;DDX3X;DDX3X;DDX3X;DDX3X;DDX3X;DDX3X;DDX3X;DDX3X;	RNA helicase;RNA helicase;RNA helicase;RNA helicase;RNA helicase;RNA helicase;RNA helicase;RNA helicase;RNA helicase;RNA helicase;RNA helicase;RNA helicase;RNA helicase;ATP-dependent RNA helicase DDX3X;RNA helicase (Fragment)	A0A0D9SF53	1	KRDLMACAQTGSG	Carbamidomethyl (C)	C	223	EKRDLMACAQTGSGK	1	1	1	1	1	1	468652	391040	499114	143476	171578	212358	0.00185706	2.57637	1.36534	0.0244043	Up
A0A0D9SF54_C2105_M1	A0A0D9SF54;A0A0D9SFF6;A0A384P5S9;A0A994J6W3;Q13813	SPTAN1;SPTAN1;;SPTAN1;SPTAN1	Spectrin alpha, non-erythrocytic 1;Spectrin alpha, non-erythrocytic 1;Epididymis secretory sperm binding protein;Spectrin alpha, non-erythrocytic 1;Spectrin alpha chain, non-erythrocytic 1	A0A0D9SF54	1	LTDPVRCNSLEEI	Carbamidomethyl (C)	C	2105	DLTDPVRCNSLEEIK	1	1	1	1	1	1	277725	249539	353865	96764.2	124858	77519.3	0.00469237	2.94553	1.55853	0.0414069	Up
A0A0D9SFB3_C223_M1	A0A0D9SF53;A0A0D9SFB3;A0A0D9SG12;A0A2R8Y4A4;A0A2R8Y5G6;A0A2R8Y645;A0A2R8Y774;A0A2R8YCW1;A0A2R8YF78;A0A2R8YFR4;A0A2R8YFS5;A0A2U3TZJ9;B5BTY4;O00571;Q59GX6	DDX3X;DDX3X;DDX3X;DDX3X;DDX3X;DDX3X;DDX3X;DDX3X;DDX3X;DDX3X;DDX3X;DDX3X;DDX3X;DDX3X;	RNA helicase;RNA helicase;RNA helicase;RNA helicase;RNA helicase;RNA helicase;RNA helicase;RNA helicase;RNA helicase;RNA helicase;RNA helicase;RNA helicase;RNA helicase;ATP-dependent RNA helicase DDX3X;RNA helicase (Fragment)	A0A0D9SFB3	1	KRDLMACAQTGSG	Carbamidomethyl (C)	C	223	EKRDLMACAQTGSGK	1	1	1	1	1	1	468652	391040	499114	143476	171578	212358	0.00185706	2.57637	1.36534	0.0244043	Up
A0A0D9SFF6_C2137_M1	A0A0D9SF54;A0A0D9SFF6;A0A384P5S9;A0A994J6W3;Q13813	SPTAN1;SPTAN1;;SPTAN1;SPTAN1	Spectrin alpha, non-erythrocytic 1;Spectrin alpha, non-erythrocytic 1;Epididymis secretory sperm binding protein;Spectrin alpha, non-erythrocytic 1;Spectrin alpha chain, non-erythrocytic 1	A0A0D9SFF6	1	LTDPVRCNSLEEI	Carbamidomethyl (C)	C	2137	DLTDPVRCNSLEEIK	1	1	1	1	1	1	277725	249539	353865	96764.2	124858	77519.3	0.00469237	2.94553	1.55853	0.0414069	Up
A0A0D9SG12_C223_M1	A0A0D9SF53;A0A0D9SFB3;A0A0D9SG12;A0A2R8Y4A4;A0A2R8Y5G6;A0A2R8Y645;A0A2R8Y774;A0A2R8YCW1;A0A2R8YF78;A0A2R8YFR4;A0A2R8YFS5;A0A2U3TZJ9;B5BTY4;O00571;Q59GX6	DDX3X;DDX3X;DDX3X;DDX3X;DDX3X;DDX3X;DDX3X;DDX3X;DDX3X;DDX3X;DDX3X;DDX3X;DDX3X;DDX3X;	RNA helicase;RNA helicase;RNA helicase;RNA helicase;RNA helicase;RNA helicase;RNA helicase;RNA helicase;RNA helicase;RNA helicase;RNA helicase;RNA helicase;RNA helicase;ATP-dependent RNA helicase DDX3X;RNA helicase (Fragment)	A0A0D9SG12	1	KRDLMACAQTGSG	Carbamidomethyl (C)	C	223	EKRDLMACAQTGSGK	1	1	1	1	1	1	468652	391040	499114	143476	171578	212358	0.00185706	2.57637	1.36534	0.0244043	Up
A0A0D9SGD3_C59_M1	A0A0D9SGD3;E5RG17;E5RGF2;Q6P1N9	TATDN1	Deoxyribonuclease TATDN1;Deoxyribonuclease TATDN1 (Fragment);Deoxyribonuclease TATDN1;Deoxyribonuclease TATDN1	A0A0D9SGD3	1	VVAIGECGLDFDR	Carbamidomethyl (C)	C	59	KVVAIGECGLDFDRL	1	1	1				426904	542594	448494	352368	238843	205098	0.0220133	1.7807	0.832447	0.0998345	Up
A0A0G2JH37_C115_M1	A0A024RCT1;A0A0A0MSV9;A0A0G2JH37;A0A0G2JKZ1;A0A1U9X8L5;A0A8V8TP24;A0A8V8TQC5;A2AB90;C9JA35;O15533	;TAPBP;TAPBP;TAPBP;;TAPBP;TAPBP;TAPBP;TAPBP;TAPBP	Tapasin	A0A0G2JH37	1	LTPAQNCPRALDG	Carbamidomethyl (C)	C	115	GLTPAQNCPRALDGA	1	1	1	1			68158.1	90622.3	70934.2	8633.48	3121	2934.41	0.000607721	15.6387	3.96705	0.0133036	Up
A0A0G2JHC2_C611_M1	A0A024RCJ8;A0A0G2JHC2;A0A1U9X8C1;A0A1U9X8C7;A0A1U9X8D1;A0A1U9X8D3;Q6NYC8	;PPP1R18;;;;;PPP1R18	PPP1R18;PPP1R18;PPP1R18;PPP1R18;PPP1R18;PPP1R18;Phostensin	A0A0G2JHC2	1	LIVDESCRR____	Carbamidomethyl (C)	C	611	ALIVDESCRR_____	1	1	1				27716.7	36695.5	25559.7	14479.1	8993.47	13456.3	0.00966728	2.43636	1.28473	0.0649877	Up
A0A0G2JKZ1_C115_M1	A0A024RCT1;A0A0A0MSV9;A0A0G2JH37;A0A0G2JKZ1;A0A1U9X8L5;A0A8V8TP24;A0A8V8TQC5;A2AB90;C9JA35;O15533	;TAPBP;TAPBP;TAPBP;;TAPBP;TAPBP;TAPBP;TAPBP;TAPBP	Tapasin	A0A0G2JKZ1	1	LTPAQNCPRALDG	Carbamidomethyl (C)	C	115	GLTPAQNCPRALDGA	1	1	1	1			68158.1	90622.3	70934.2	8633.48	3121	2934.41	0.000607721	15.6387	3.96705	0.0133036	Up
A0A0K0K1H7_C385_M1	A0A0K0K1H7;A0A7I2V3F1;A0A7I2V3U0;A0A7I2V586;A2A274;B2RBW5;B4DZ08;Q99798	HEL-S-284;ACO2;ACO2;ACO2;ACO2;;;ACO2	Aconitate hydratase, mitochondrial;Aconitate hydratase, mitochondrial;Aconitate hydratase, mitochondrial;Aconitate hydratase, mitochondrial;Aconitase 2;Aconitate hydratase, mitochondrial;Aconitate hydratase, mitochondrial;Aconitate hydratase, mitochondrial	A0A0K0K1H7	1	VGLIGSCTNSSYE	Carbamidomethyl (C)	C	385	RVGLIGSCTNSSYED	1	1	1	1		1	7051.84	7923.69	4295.35	3352.39	2008.54	1147.78	0.0284222	2.96078	1.56598	0.113666	Up
A0A0N6W7J7_C163_M1	A0A0N6W7J7	HLA-B	MHC class I antigen (Fragment)	A0A0N6W7J7	1	AYLEGLCMESLRR	Carbamidomethyl (C)	C	163	RAYLEGLCMESLRRY							57754.8	68984.4	62400.1	27886.6	27284.1	29552.6	0.000472174	2.23244	1.15862	0.0121466	Up
A0A0R4J2E8_C806_M1	A0A0R4J2E8;A8MXP9;P43243	MATR3	Matrin-3;Matrin 3;Matrin-3	A0A0R4J2E8	1	GFYCKLCSLFYTN	Carbamidomethyl (C)	C	806	TGFYCKLCSLFYTNE	1	1	1	1	1	1	98487.3	116775	133091	41879.3	22271.5	19080.4	0.00197311	4.18537	2.06535	0.0250209	Up
A0A0S2Z2Z6_C552_M1	A0A0S2Z2Z6;P08133	ANXA6	Annexin (Fragment);Annexin A6	A0A0S2Z2Z6	1	RFMTILCTRSYPH	Carbamidomethyl (C)	C	552	TRFMTILCTRSYPHL				1			19849	21761.6	23643.9	7836.67	4157.26	3391.62	0.000694224	4.24129	2.0845	0.0139457	Up
A0A0S2Z3G9_C499_M1	A0A0S2Z3G9;O43707	ACTN4	Alpha-actinin-4 (Fragment);Alpha-actinin-4	A0A0S2Z3G9	1	TRCQKICDQWDAL	Carbamidomethyl (C)	C	499	NTRCQKICDQWDALG	1	1	1	1	1	1	93001.8	103444	91225.4	7572.4	6258.18	17722.8	8.42059e-05	9.11697	3.18855	0.00797536	Up
A0A0S2Z3G9_C793_M1	A0A0S2Z3G9;O43707	ACTN4	Alpha-actinin-4 (Fragment);Alpha-actinin-4	A0A0S2Z3G9	1	PEEFKACLISLGY	Carbamidomethyl (C)	C	793	GPEEFKACLISLGYD	1	1	1	1			42858.8	42229.3	51177.2	19755.6	17073.7	13474.2	0.00109728	2.70886	1.43769	0.0187914	Up
A0A0S2Z3L2_C364_M1	A0A0S2Z3L2;P16615	ATP2A2	Sarcoplasmic/endoplasmic reticulum calcium ATPase 2 (Fragment);Sarcoplasmic/endoplasmic reticulum calcium ATPase 2	A0A0S2Z3L2	1	TNQMSVCRMFILD	Carbamidomethyl (C)	C	364	TTNQMSVCRMFILDR	1	1	1	1		1	19668.7	14303.4	21243.5	8002.29	4389.67	5619.35	0.00621176	3.0656	1.61617	0.0505076	Up
A0A0S2Z410_C214_M1	A0A0S2Z410;Q99714	HSD17B10	Epididymis secretory sperm binding protein (Fragment);3-hydroxyacyl-CoA dehydrogenase type-2	A0A0S2Z410	1	SLPEKVCNFLASQ	Carbamidomethyl (C)	C	214	TSLPEKVCNFLASQV	1	1	1	1	1		27831.5	33026.6	36574.9	21139.2	12128.8	4187.84	0.0222662	2.60127	1.37922	0.100431	Up
A0A0S2Z489_C255_M1	A0A0S2Z489;O00232	PSMD12	Proteasome (Prosome, macropain) 26S subunit, non-ATPase, 12, isoform CRA_a (Fragment);26S proteasome non-ATPase regulatory subunit 12	A0A0S2Z489	1	AIYDTPCIQAESE	Carbamidomethyl (C)	C	255	RAIYDTPCIQAESEK	1	1	1	1	1	1	16380.6	27279.1	25622.8	8658.22	12535.8	14829.4	0.0446683	1.92327	0.94356	0.149845	Up
A0A140VJE8_C391_M1	A0A140VJE8;A8K0G3;A8K916;P63010	AP2B1;;;AP2B1	AP complex subunit beta;AP complex subunit beta;AP complex subunit beta;AP-2 complex subunit beta	A0A140VJE8	1	EQSAERCVSTLLD	Carbamidomethyl (C)	C	391	VEQSAERCVSTLLDL	1	1	1	1			5567.01	6930.88	6434.56	1869.95	1979.61	1742.98	0.00038865	3.38531	1.75929	0.0115412	Up
A0A140VJK6_C523_M1	A0A140VJK6;B4DUT7;P49915	;;GMPS	GMP synthase (glutamine-hydrolyzing);GMP synthase (glutamine-hydrolyzing);GMP synthase [glutamine-hydrolyzing]	A0A140VJK6	1	VGVQGDCRSYSYV	Carbamidomethyl (C)	C	523	TVGVQGDCRSYSYVC	1	1	1	1	1	1	7649.74	8770.94	9296.25	6666.79	3164.81	4536.95	0.0285213	1.78981	0.839805	0.113666	Up
A0A140VJQ4_C150_M1	A0A140VJQ4;P04181	;OAT	Ornithine aminotransferase;Ornithine aminotransferase, mitochondrial	A0A140VJQ4	1	EAGETACKLARKW	Carbamidomethyl (C)	C	150	VEAGETACKLARKWG	1	1	1	1			13222.5	12515.5	13920.3	6101.76	4447.77	2934.41	0.000952483	2.94115	1.55638	0.0166807	Up
A0A140VJS0_C251_M1	A0A140VJS0;B3KRM2;P62714;Q5U0I7;Q8WZ56	;;PPP2CB;;	Serine/threonine-protein phosphatase;Serine/threonine-protein phosphatase;Serine/threonine-protein phosphatase 2A catalytic subunit beta isoform;Serine/threonine-protein phosphatase;Serine/threonine-protein phosphatase	A0A140VJS0	1	MEGYNWCHDRNVV	Carbamidomethyl (C)	C	251	VMEGYNWCHDRNVVT	1	1	1				95190.4	145619	102312	67047.6	59454.7	57947.2	0.0298149	1.86025	0.895496	0.116036	Up
A0A140VJS0_C266_M1	A0A140VJS0;B3KRM2;P62714;Q5U0I7;Q8WZ56	;;PPP2CB;;	Serine/threonine-protein phosphatase;Serine/threonine-protein phosphatase;Serine/threonine-protein phosphatase 2A catalytic subunit beta isoform;Serine/threonine-protein phosphatase;Serine/threonine-protein phosphatase	A0A140VJS0	1	FSAPNYCYRCGNQ	Carbamidomethyl (C)	C	266	IFSAPNYCYRCGNQA	1	1	1	1		1	12140.4	13527.7	9617.65	2630.15	3930.29	6876.98	0.0127929	2.62593	1.39283	0.0734247	Up
A0A140VJS6_C46_M1	A0A140VJS6;P49721	;PSMB2	Proteasome subunit beta;Proteasome subunit beta type-2	A0A140VJS6	1	EKILLLCVGEAGD	Carbamidomethyl (C)	C	46	SEKILLLCVGEAGDT				1	1	1	3591.88	5520.82	6748.04	1874.75	790.891	1773.59	0.0178553	3.57286	1.83708	0.0884992	Up
A0A140VJT0_C262_M1	A0A140VJT0;P63151;Q56VW8	;PPP2R2A;	Serine/threonine-protein phosphatase 2A 55 kDa regulatory subunit B;Serine/threonine-protein phosphatase 2A 55 kDa regulatory subunit B alpha isoform;Serine/threonine-protein phosphatase 2A 55 kDa regulatory subunit B	A0A140VJT0	1	MRASALCDRHSKL	Carbamidomethyl (C)	C	262	DMRASALCDRHSKLF	1	1	1				34940	45512	64653.3	16884.2	8625.09	15684	0.0187911	3.52255	1.81662	0.0920683	Up
A0A140VJX1_C196_M1	A0A140VJX1;A0A5F9ZHL1;P24752	;ACAT1;ACAT1	Acetyl-CoA acetyltransferase, mitochondrial;Acetyl-CoA acetyltransferase, mitochondrial;Acetyl-CoA acetyltransferase, mitochondrial	A0A140VJX1	1	KIHMGSCAENTAK	Carbamidomethyl (C)	C	196	NKIHMGSCAENTAKK	1	1	1	1	1		8149.82	7096.88	9110.63	4870.6	2832.08	2184.32	0.00840104	2.46357	1.30075	0.060912	Up
A0A140VJZ1_C838_M1	A0A140VJZ1;P45974	;USP5	Ubiquitin carboxyl-terminal hydrolase;Ubiquitin carboxyl-terminal hydrolase 5	A0A140VJZ1	1	YNDQKVCASEKPP	Carbamidomethyl (C)	C	838	IYNDQKVCASEKPPK	1	1	1				16356.8	14697.3	13241.4	10855.9	9377.59	9119.45	0.00901453	1.50906	0.593652	0.0625597	Up
A0A140VK56_C250_M1	A0A140VK56;P37837	;TALDO1	Transaldolase	A0A140VK56	1	IKALAGCDFLTIS	Carbamidomethyl (C)	C	250	EIKALAGCDFLTISP	1	1	1	1	1	1	75099.1	84126.9	83021.1	32703.9	38438.1	31987.1	0.000187515	2.34897	1.23203	0.0108536	Up
A0A140VK70_C389_M1	A0A140VK70;C9JX88;P35998	;PSMC2;PSMC2	26S proteasome regulatory subunit 7	A0A140VK70	1	AEIRSVCTEAGMF	Carbamidomethyl (C)	C	389	GAEIRSVCTEAGMFA	1	1	1				73438.9	91224.2	96877.9	23874.6	12564.8	18794.5	0.000905406	4.73516	2.24341	0.0160353	Up
A0A146IHP0_C602_M1	A0A146IHP0;A4D2Q0;A7MCZ7;E9PHI4;O94901	SUN1;UNC84A;UNC84A;SUN1;SUN1	SUN domain-containing protein 1;Unc-84 homolog A (C. elegans);UNC84A protein;Sad1 and UNC84 domain containing 1;SUN domain-containing protein 1	A0A146IHP0	1	RHVKTGCETVDAV	Carbamidomethyl (C)	C	602	WRHVKTGCETVDAVQ	1	1	1		1		108675	156317	193464	59521.6	61916.4	19838.2	0.0196797	3.24511	1.69827	0.0937327	Up
A0A1C7CYX9_C609_M1	A0A1C7CYX9;Q59GB4	DPYSL2;	Dihydropyrimidinase-related protein 2;Dihydropyrimidinase-related protein 2 (Fragment)	A0A1C7CYX9	1	LYDGPVCEVSVTP	Carbamidomethyl (C)	C	609	GLYDGPVCEVSVTPK	1	1	1		1		23161.9	27427.4	24280.4	7896.44	5283.67	3814.27	0.000383203	4.40556	2.13932	0.0115412	Up
A0A1U9X8C1_C611_M1	A0A024RCJ8;A0A0G2JHC2;A0A1U9X8C1;A0A1U9X8C7;A0A1U9X8D1;A0A1U9X8D3;Q6NYC8	;PPP1R18;;;;;PPP1R18	PPP1R18;PPP1R18;PPP1R18;PPP1R18;PPP1R18;PPP1R18;Phostensin	A0A1U9X8C1	1	LIVDESCRR____	Carbamidomethyl (C)	C	611	ALIVDESCRR_____	1	1	1				27716.7	36695.5	25559.7	14479.1	8993.47	13456.3	0.00966728	2.43636	1.28473	0.0649877	Up
A0A1U9X8C7_C611_M1	A0A024RCJ8;A0A0G2JHC2;A0A1U9X8C1;A0A1U9X8C7;A0A1U9X8D1;A0A1U9X8D3;Q6NYC8	;PPP1R18;;;;;PPP1R18	PPP1R18;PPP1R18;PPP1R18;PPP1R18;PPP1R18;PPP1R18;Phostensin	A0A1U9X8C7	1	LIVDESCRR____	Carbamidomethyl (C)	C	611	ALIVDESCRR_____	1	1	1				27716.7	36695.5	25559.7	14479.1	8993.47	13456.3	0.00966728	2.43636	1.28473	0.0649877	Up
A0A1U9X8D1_C611_M1	A0A024RCJ8;A0A0G2JHC2;A0A1U9X8C1;A0A1U9X8C7;A0A1U9X8D1;A0A1U9X8D3;Q6NYC8	;PPP1R18;;;;;PPP1R18	PPP1R18;PPP1R18;PPP1R18;PPP1R18;PPP1R18;PPP1R18;Phostensin	A0A1U9X8D1	1	LIVDESCRR____	Carbamidomethyl (C)	C	611	ALIVDESCRR_____	1	1	1				27716.7	36695.5	25559.7	14479.1	8993.47	13456.3	0.00966728	2.43636	1.28473	0.0649877	Up
A0A1U9X8D3_C611_M1	A0A024RCJ8;A0A0G2JHC2;A0A1U9X8C1;A0A1U9X8C7;A0A1U9X8D1;A0A1U9X8D3;Q6NYC8	;PPP1R18;;;;;PPP1R18	PPP1R18;PPP1R18;PPP1R18;PPP1R18;PPP1R18;PPP1R18;Phostensin	A0A1U9X8D3	1	LIVDESCRR____	Carbamidomethyl (C)	C	611	ALIVDESCRR_____	1	1	1				27716.7	36695.5	25559.7	14479.1	8993.47	13456.3	0.00966728	2.43636	1.28473	0.0649877	Up
A0A1U9X8L5_C115_M1	A0A024RCT1;A0A0A0MSV9;A0A0G2JH37;A0A0G2JKZ1;A0A1U9X8L5;A0A8V8TP24;A0A8V8TQC5;A2AB90;C9JA35;O15533	;TAPBP;TAPBP;TAPBP;;TAPBP;TAPBP;TAPBP;TAPBP;TAPBP	Tapasin	A0A1U9X8L5	1	LTPAQNCPRALDG	Carbamidomethyl (C)	C	115	GLTPAQNCPRALDGA	1	1	1	1			68158.1	90622.3	70934.2	8633.48	3121	2934.41	0.000607721	15.6387	3.96705	0.0133036	Up
A0A1W2PNP0_C274_M1	A0A1W2PNP0;A0A1W2PP57;A0A1W2PPC3;A0A1W2PPR6;A0A1W2PPS0;A0A1W2PR73;Q969N2	PIGT	Phosphatidylinositol glycan anchor biosynthesis class T (Fragment);Phosphatidylinositol glycan anchor biosynthesis class T;Phosphatidylinositol glycan anchor biosynthesis class T;Phosphatidylinositol glycan anchor biosynthesis class T;Phosphatidylinositol glycan anchor biosynthesis class T;Phosphatidylinositol glycan anchor biosynthesis class T;GPI transamidase component PIG-T	A0A1W2PNP0	1	RTLTEPCPLASES	Carbamidomethyl (C)	C	274	SRTLTEPCPLASESR	1	1	1	1	1	1	71844.8	66482.4	57005	16931.5	12993.8	15827.7	0.00037547	4.26928	2.09399	0.0115412	Up
A0A1W2PP57_C272_M1	A0A1W2PNP0;A0A1W2PP57;A0A1W2PPC3;A0A1W2PPR6;A0A1W2PPS0;A0A1W2PR73;Q969N2	PIGT	Phosphatidylinositol glycan anchor biosynthesis class T (Fragment);Phosphatidylinositol glycan anchor biosynthesis class T;Phosphatidylinositol glycan anchor biosynthesis class T;Phosphatidylinositol glycan anchor biosynthesis class T;Phosphatidylinositol glycan anchor biosynthesis class T;Phosphatidylinositol glycan anchor biosynthesis class T;GPI transamidase component PIG-T	A0A1W2PP57	1	RTLTEPCPLASES	Carbamidomethyl (C)	C	272	SRTLTEPCPLASESR	1	1	1	1	1	1	71844.8	66482.4	57005	16931.5	12993.8	15827.7	0.00037547	4.26928	2.09399	0.0115412	Up
A0A1W2PPC3_C272_M1	A0A1W2PNP0;A0A1W2PP57;A0A1W2PPC3;A0A1W2PPR6;A0A1W2PPS0;A0A1W2PR73;Q969N2	PIGT	Phosphatidylinositol glycan anchor biosynthesis class T (Fragment);Phosphatidylinositol glycan anchor biosynthesis class T;Phosphatidylinositol glycan anchor biosynthesis class T;Phosphatidylinositol glycan anchor biosynthesis class T;Phosphatidylinositol glycan anchor biosynthesis class T;Phosphatidylinositol glycan anchor biosynthesis class T;GPI transamidase component PIG-T	A0A1W2PPC3	1	RTLTEPCPLASES	Carbamidomethyl (C)	C	272	SRTLTEPCPLASESR	1	1	1	1	1	1	71844.8	66482.4	57005	16931.5	12993.8	15827.7	0.00037547	4.26928	2.09399	0.0115412	Up
A0A1W2PPR6_C272_M1	A0A1W2PNP0;A0A1W2PP57;A0A1W2PPC3;A0A1W2PPR6;A0A1W2PPS0;A0A1W2PR73;Q969N2	PIGT	Phosphatidylinositol glycan anchor biosynthesis class T (Fragment);Phosphatidylinositol glycan anchor biosynthesis class T;Phosphatidylinositol glycan anchor biosynthesis class T;Phosphatidylinositol glycan anchor biosynthesis class T;Phosphatidylinositol glycan anchor biosynthesis class T;Phosphatidylinositol glycan anchor biosynthesis class T;GPI transamidase component PIG-T	A0A1W2PPR6	1	RTLTEPCPLASES	Carbamidomethyl (C)	C	272	SRTLTEPCPLASESR	1	1	1	1	1	1	71844.8	66482.4	57005	16931.5	12993.8	15827.7	0.00037547	4.26928	2.09399	0.0115412	Up
A0A1W2PPS0_C272_M1	A0A1W2PNP0;A0A1W2PP57;A0A1W2PPC3;A0A1W2PPR6;A0A1W2PPS0;A0A1W2PR73;Q969N2	PIGT	Phosphatidylinositol glycan anchor biosynthesis class T (Fragment);Phosphatidylinositol glycan anchor biosynthesis class T;Phosphatidylinositol glycan anchor biosynthesis class T;Phosphatidylinositol glycan anchor biosynthesis class T;Phosphatidylinositol glycan anchor biosynthesis class T;Phosphatidylinositol glycan anchor biosynthesis class T;GPI transamidase component PIG-T	A0A1W2PPS0	1	RTLTEPCPLASES	Carbamidomethyl (C)	C	272	SRTLTEPCPLASESR	1	1	1	1	1	1	71844.8	66482.4	57005	16931.5	12993.8	15827.7	0.00037547	4.26928	2.09399	0.0115412	Up
A0A1W2PR73_C272_M1	A0A1W2PNP0;A0A1W2PP57;A0A1W2PPC3;A0A1W2PPR6;A0A1W2PPS0;A0A1W2PR73;Q969N2	PIGT	Phosphatidylinositol glycan anchor biosynthesis class T (Fragment);Phosphatidylinositol glycan anchor biosynthesis class T;Phosphatidylinositol glycan anchor biosynthesis class T;Phosphatidylinositol glycan anchor biosynthesis class T;Phosphatidylinositol glycan anchor biosynthesis class T;Phosphatidylinositol glycan anchor biosynthesis class T;GPI transamidase component PIG-T	A0A1W2PR73	1	RTLTEPCPLASES	Carbamidomethyl (C)	C	272	SRTLTEPCPLASESR	1	1	1	1	1	1	71844.8	66482.4	57005	16931.5	12993.8	15827.7	0.00037547	4.26928	2.09399	0.0115412	Up
A0A286YF22_C295_M1	A0A286YF22;A0A2C9F2M7;O43175	PHGDH	D-3-phosphoglycerate dehydrogenase	A0A286YF22	1	KEAQSRCGEEIAV	Carbamidomethyl (C)	C	295	TKEAQSRCGEEIAVQ	1	1		1	1	1	24315.9	36161.6	15421.7	4802.87	5247.24	842.247	0.0246061	6.96812	2.80077	0.106637	Up
A0A2C9F2M7_C295_M1	A0A286YF22;A0A2C9F2M7;O43175	PHGDH	D-3-phosphoglycerate dehydrogenase	A0A2C9F2M7	1	KEAQSRCGEEIAV	Carbamidomethyl (C)	C	295	TKEAQSRCGEEIAVQ	1	1		1	1	1	24315.9	36161.6	15421.7	4802.87	5247.24	842.247	0.0246061	6.96812	2.80077	0.106637	Up
A0A2R8Y430_C422_M1	A0A2R8Y430;P48637;V9HWJ1	GSS;GSS;HEL-S-64p	Glutathione synthetase	A0A2R8Y430	1	PARVVQCISELGI	Carbamidomethyl (C)	C	422	SPARVVQCISELGIF				1	1	1	10384.5	11370	10486.1	6680.72	5491.35	4136.17	0.00265881	1.97695	0.983276	0.0299263	Up
A0A2R8Y4A4_C223_M1	A0A0D9SF53;A0A0D9SFB3;A0A0D9SG12;A0A2R8Y4A4;A0A2R8Y5G6;A0A2R8Y645;A0A2R8Y774;A0A2R8YCW1;A0A2R8YF78;A0A2R8YFR4;A0A2R8YFS5;A0A2U3TZJ9;B5BTY4;O00571;Q59GX6	DDX3X;DDX3X;DDX3X;DDX3X;DDX3X;DDX3X;DDX3X;DDX3X;DDX3X;DDX3X;DDX3X;DDX3X;DDX3X;DDX3X;	RNA helicase;RNA helicase;RNA helicase;RNA helicase;RNA helicase;RNA helicase;RNA helicase;RNA helicase;RNA helicase;RNA helicase;RNA helicase;RNA helicase;RNA helicase;ATP-dependent RNA helicase DDX3X;RNA helicase (Fragment)	A0A2R8Y4A4	1	KRDLMACAQTGSG	Carbamidomethyl (C)	C	223	EKRDLMACAQTGSGK	1	1	1	1	1	1	468652	391040	499114	143476	171578	212358	0.00185706	2.57637	1.36534	0.0244043	Up
A0A2R8Y5G6_C184_M1	A0A0D9SF53;A0A0D9SFB3;A0A0D9SG12;A0A2R8Y4A4;A0A2R8Y5G6;A0A2R8Y645;A0A2R8Y774;A0A2R8YCW1;A0A2R8YF78;A0A2R8YFR4;A0A2R8YFS5;A0A2U3TZJ9;B5BTY4;O00571;Q59GX6	DDX3X;DDX3X;DDX3X;DDX3X;DDX3X;DDX3X;DDX3X;DDX3X;DDX3X;DDX3X;DDX3X;DDX3X;DDX3X;DDX3X;	RNA helicase;RNA helicase;RNA helicase;RNA helicase;RNA helicase;RNA helicase;RNA helicase;RNA helicase;RNA helicase;RNA helicase;RNA helicase;RNA helicase;RNA helicase;ATP-dependent RNA helicase DDX3X;RNA helicase (Fragment)	A0A2R8Y5G6	1	KRDLMACAQTGSG	Carbamidomethyl (C)	C	184	EKRDLMACAQTGSGK	1	1	1	1	1	1	468652	391040	499114	143476	171578	212358	0.00185706	2.57637	1.36534	0.0244043	Up
A0A2R8Y645_C222_M1	A0A0D9SF53;A0A0D9SFB3;A0A0D9SG12;A0A2R8Y4A4;A0A2R8Y5G6;A0A2R8Y645;A0A2R8Y774;A0A2R8YCW1;A0A2R8YF78;A0A2R8YFR4;A0A2R8YFS5;A0A2U3TZJ9;B5BTY4;O00571;Q59GX6	DDX3X;DDX3X;DDX3X;DDX3X;DDX3X;DDX3X;DDX3X;DDX3X;DDX3X;DDX3X;DDX3X;DDX3X;DDX3X;DDX3X;	RNA helicase;RNA helicase;RNA helicase;RNA helicase;RNA helicase;RNA helicase;RNA helicase;RNA helicase;RNA helicase;RNA helicase;RNA helicase;RNA helicase;RNA helicase;ATP-dependent RNA helicase DDX3X;RNA helicase (Fragment)	A0A2R8Y645	1	KRDLMACAQTGSG	Carbamidomethyl (C)	C	222	EKRDLMACAQTGSGK	1	1	1	1	1	1	468652	391040	499114	143476	171578	212358	0.00185706	2.57637	1.36534	0.0244043	Up
A0A2R8Y774_C267_M1	A0A0D9SF53;A0A0D9SFB3;A0A0D9SG12;A0A2R8Y4A4;A0A2R8Y5G6;A0A2R8Y645;A0A2R8Y774;A0A2R8YCW1;A0A2R8YF78;A0A2R8YFR4;A0A2R8YFS5;A0A2U3TZJ9;B5BTY4;O00571;Q59GX6	DDX3X;DDX3X;DDX3X;DDX3X;DDX3X;DDX3X;DDX3X;DDX3X;DDX3X;DDX3X;DDX3X;DDX3X;DDX3X;DDX3X;	RNA helicase;RNA helicase;RNA helicase;RNA helicase;RNA helicase;RNA helicase;RNA helicase;RNA helicase;RNA helicase;RNA helicase;RNA helicase;RNA helicase;RNA helicase;ATP-dependent RNA helicase DDX3X;RNA helicase (Fragment)	A0A2R8Y774	1	KRDLMACAQTGSG	Carbamidomethyl (C)	C	267	EKRDLMACAQTGSGK	1	1	1	1	1	1	468652	391040	499114	143476	171578	212358	0.00185706	2.57637	1.36534	0.0244043	Up
A0A2R8YCW1_C209_M1	A0A0D9SF53;A0A0D9SFB3;A0A0D9SG12;A0A2R8Y4A4;A0A2R8Y5G6;A0A2R8Y645;A0A2R8Y774;A0A2R8YCW1;A0A2R8YF78;A0A2R8YFR4;A0A2R8YFS5;A0A2U3TZJ9;B5BTY4;O00571;Q59GX6	DDX3X;DDX3X;DDX3X;DDX3X;DDX3X;DDX3X;DDX3X;DDX3X;DDX3X;DDX3X;DDX3X;DDX3X;DDX3X;DDX3X;	RNA helicase;RNA helicase;RNA helicase;RNA helicase;RNA helicase;RNA helicase;RNA helicase;RNA helicase;RNA helicase;RNA helicase;RNA helicase;RNA helicase;RNA helicase;ATP-dependent RNA helicase DDX3X;RNA helicase (Fragment)	A0A2R8YCW1	1	KRDLMACAQTGSG	Carbamidomethyl (C)	C	209	EKRDLMACAQTGSGK	1	1	1	1	1	1	468652	391040	499114	143476	171578	212358	0.00185706	2.57637	1.36534	0.0244043	Up
A0A2R8YF78_C223_M1	A0A0D9SF53;A0A0D9SFB3;A0A0D9SG12;A0A2R8Y4A4;A0A2R8Y5G6;A0A2R8Y645;A0A2R8Y774;A0A2R8YCW1;A0A2R8YF78;A0A2R8YFR4;A0A2R8YFS5;A0A2U3TZJ9;B5BTY4;O00571;Q59GX6	DDX3X;DDX3X;DDX3X;DDX3X;DDX3X;DDX3X;DDX3X;DDX3X;DDX3X;DDX3X;DDX3X;DDX3X;DDX3X;DDX3X;	RNA helicase;RNA helicase;RNA helicase;RNA helicase;RNA helicase;RNA helicase;RNA helicase;RNA helicase;RNA helicase;RNA helicase;RNA helicase;RNA helicase;RNA helicase;ATP-dependent RNA helicase DDX3X;RNA helicase (Fragment)	A0A2R8YF78	1	KRDLMACAQTGSG	Carbamidomethyl (C)	C	223	EKRDLMACAQTGSGK	1	1	1	1	1	1	468652	391040	499114	143476	171578	212358	0.00185706	2.57637	1.36534	0.0244043	Up
A0A2R8YFR4_C222_M1	A0A0D9SF53;A0A0D9SFB3;A0A0D9SG12;A0A2R8Y4A4;A0A2R8Y5G6;A0A2R8Y645;A0A2R8Y774;A0A2R8YCW1;A0A2R8YF78;A0A2R8YFR4;A0A2R8YFS5;A0A2U3TZJ9;B5BTY4;O00571;Q59GX6	DDX3X;DDX3X;DDX3X;DDX3X;DDX3X;DDX3X;DDX3X;DDX3X;DDX3X;DDX3X;DDX3X;DDX3X;DDX3X;DDX3X;	RNA helicase;RNA helicase;RNA helicase;RNA helicase;RNA helicase;RNA helicase;RNA helicase;RNA helicase;RNA helicase;RNA helicase;RNA helicase;RNA helicase;RNA helicase;ATP-dependent RNA helicase DDX3X;RNA helicase (Fragment)	A0A2R8YFR4	1	KRDLMACAQTGSG	Carbamidomethyl (C)	C	222	EKRDLMACAQTGSGK	1	1	1	1	1	1	468652	391040	499114	143476	171578	212358	0.00185706	2.57637	1.36534	0.0244043	Up
A0A2R8YFS5_C223_M1	A0A0D9SF53;A0A0D9SFB3;A0A0D9SG12;A0A2R8Y4A4;A0A2R8Y5G6;A0A2R8Y645;A0A2R8Y774;A0A2R8YCW1;A0A2R8YF78;A0A2R8YFR4;A0A2R8YFS5;A0A2U3TZJ9;B5BTY4;O00571;Q59GX6	DDX3X;DDX3X;DDX3X;DDX3X;DDX3X;DDX3X;DDX3X;DDX3X;DDX3X;DDX3X;DDX3X;DDX3X;DDX3X;DDX3X;	RNA helicase;RNA helicase;RNA helicase;RNA helicase;RNA helicase;RNA helicase;RNA helicase;RNA helicase;RNA helicase;RNA helicase;RNA helicase;RNA helicase;RNA helicase;ATP-dependent RNA helicase DDX3X;RNA helicase (Fragment)	A0A2R8YFS5	1	KRDLMACAQTGSG	Carbamidomethyl (C)	C	223	EKRDLMACAQTGSGK	1	1	1	1	1	1	468652	391040	499114	143476	171578	212358	0.00185706	2.57637	1.36534	0.0244043	Up
A0A2U3TZH3_C411_M1	A0A2U3TZH3;A0A9L9PYI8;Q05639	EEF1A2	Elongation factor 1-alpha;Elongation factor 1-alpha 2;Elongation factor 1-alpha 2	A0A2U3TZH3	1	VPGKPMCVESFSQ	Carbamidomethyl (C)	C	411	MVPGKPMCVESFSQY	1	1	1	1	1	1	42578.9	41286.8	32309.1	3657.08	5083.32	1292.35	0.000489103	11.5796	3.53351	0.0121466	Up
A0A2U3TZJ9_C222_M1	A0A0D9SF53;A0A0D9SFB3;A0A0D9SG12;A0A2R8Y4A4;A0A2R8Y5G6;A0A2R8Y645;A0A2R8Y774;A0A2R8YCW1;A0A2R8YF78;A0A2R8YFR4;A0A2R8YFS5;A0A2U3TZJ9;B5BTY4;O00571;Q59GX6	DDX3X;DDX3X;DDX3X;DDX3X;DDX3X;DDX3X;DDX3X;DDX3X;DDX3X;DDX3X;DDX3X;DDX3X;DDX3X;DDX3X;	RNA helicase;RNA helicase;RNA helicase;RNA helicase;RNA helicase;RNA helicase;RNA helicase;RNA helicase;RNA helicase;RNA helicase;RNA helicase;RNA helicase;RNA helicase;ATP-dependent RNA helicase DDX3X;RNA helicase (Fragment)	A0A2U3TZJ9	1	KRDLMACAQTGSG	Carbamidomethyl (C)	C	222	EKRDLMACAQTGSGK	1	1	1	1	1	1	468652	391040	499114	143476	171578	212358	0.00185706	2.57637	1.36534	0.0244043	Up
A0A2U3TZU2_C443_M1	A0A2U3TZU2;B4DE36;B4DVJ0;P06744	GPI;;;GPI	Glucose-6-phosphate isomerase	A0A2U3TZU2	1	GTKMIPCDFLIPV	Carbamidomethyl (C)	C	443	QGTKMIPCDFLIPVQ	1	1	1	1			26659.3	25245	27584.5	13719.7	11537.5	8351.64	0.00084637	2.36512	1.24191	0.0157943	Up
A0A384MDR8_C263_M1	A0A384MDR8;P11177	;PDHB	Pyruvate dehydrogenase E1 component subunit beta;Pyruvate dehydrogenase E1 component subunit beta, mitochondrial	A0A384MDR8	1	SKEGVECEVINMR	Carbamidomethyl (C)	C	263	LSKEGVECEVINMRT	1	1	1				346345	391790	361754	34909.6	43157.6	41148.4	1.76289e-05	9.22605	3.20571	0.00376266	Up
A0A384MEF1_C331_M1	A0A0A0MS51;A0A0A0MT01;A0A384MEF1;A0A8V8TND7;B7Z6N2;B7Z992;B7Z9A0;P06396	GSN;GSN;;GSN;;;;GSN	Gelsolin	A0A384MEF1	1	ALKSEDCFILDHG	Carbamidomethyl (C)	C	331	GALKSEDCFILDHGK	1	1	1	1			19045.3	23749.8	20873	10867.9	6458.65	9634.61	0.00297597	2.36147	1.23969	0.0313966	Up
A0A384MEG1_C61_M1	A0A384MEG1;Q16658	;FSCN1	Fascin	A0A384MEG1	1	AGSAAVCLRSHLG	Carbamidomethyl (C)	C	61	EAGSAAVCLRSHLGR				1			18152.1	17048.2	23362.6	8213.97	11683.3	5800.11	0.0133663	2.27895	1.18837	0.0738366	Up
A0A384MEG1_C89_M1	A0A384MEG1;Q16658	;FSCN1	Fascin	A0A384MEG1	1	EVPGPDCRFLIVA	Carbamidomethyl (C)	C	89	REVPGPDCRFLIVAH				1	1	1	38742.6	44038.3	42127.7	12703.6	8888.86	9819.12	8.56357e-05	3.97651	1.9915	0.00797536	Up
A0A384MEJ3_C22_M1	A0A384MEJ3;G8JLB6;P31943	;HNRNPH1;HNRNPH1	Epididymis secretory sperm binding protein;Heterogeneous nuclear ribonucleoprotein H1;Heterogeneous nuclear ribonucleoprotein H	A0A384MEJ3	1	RGLPWSCSADEVQ	Carbamidomethyl (C)	C	22	VRGLPWSCSADEVQR	1	1	1	1	1	1	404034	384176	372748	155061	136540	111924	8.27092e-05	2.87704	1.52459	0.00797536	Up
A0A384MR29_C716_M1	A0A384MR29;P20648;Q658V6	;ATP4A;DKFZp666G172	Sodium/potassium-transporting ATPase subunit alpha;Potassium-transporting ATPase alpha chain 1;Sodium/potassium-transporting ATPase subunit alpha (Fragment)	A0A384MR29	1	LVIVESCQRLGAI	Carbamidomethyl (C)	C	716	KLVIVESCQRLGAIV	1	1	1	1	1		30718.1	27252.4	27819.7	4518.5	10223.6	4362.78	0.000546398	4.4905	2.16688	0.0127805	Up
A0A384MR44_C187_M1	A0A384MR44;Q13011	;ECH1	Epididymis secretory sperm binding protein;Delta(3,5)-Delta(2,4)-dienoyl-CoA isomerase, mitochondrial	A0A384MR44	1	ACDIRYCAQDAFF	Carbamidomethyl (C)	C	187	TACDIRYCAQDAFFQ	1	1	1	1	1	1	112111	147093	151210	32053.2	48903.4	52746.8	0.00270306	3.06958	1.61804	0.0299263	Up
A0A384MTR5_C206_M1	A0A384MTR5;B5BUB1;Q9Y265	;RUVBL1;RUVBL1	RuvB-like helicase;RuvB-like helicase (Fragment);RuvB-like 1	A0A384MTR5	1	VKRQGRCDTYATE	Carbamidomethyl (C)	C	206	AVKRQGRCDTYATEF				1	1	1	12594.8	18285.3	16182.5	6001.39	7971.64	3762.28	0.00898079	2.65361	1.40795	0.0625597	Up
A0A384N6B9_C54_M1	A0A384N6B9;Q15366	;PCBP2	Epididymis secretory sperm binding protein;Poly(rC)-binding protein 2	A0A384N6B9	1	NISEGNCPERIIT	Carbamidomethyl (C)	C	54	INISEGNCPERIITL	1	1	1	1	1	1	195959	140280	120504	56042.7	94220.2	76119	0.0378478	2.01758	1.01263	0.136536	Up
A0A384N6H6_C121_M1	A0A384N6H6;B5MCX3;Q15019	;SEPTIN2;SEPTIN2	Septin;Septin-2;Septin-2	A0A384N6H6	1	YGDAINCRDCFKT	Carbamidomethyl (C)	C	121	GYGDAINCRDCFKTI	1	1	1	1	1	1	149133	171130	145050	15366.6	64826.3	78515.6	0.00799259	2.93187	1.55182	0.0595832	Up
A0A384NL00_C232_M1	A0A384NL00;A8K8D9;P11413	;;G6PD	Glucose-6-phosphate 1-dehydrogenase	A0A384NL00	1	NRDNIACVILTFK	Carbamidomethyl (C)	C	232	WNRDNIACVILTFKE				1	1		25768.5	33599.7	34862.3	10017.6	15629.2	9665.2	0.00464651	2.66851	1.41603	0.0414069	Up
A0A384NL63_C196_M1	A0A384NL63;A0A7I2V2R3;A0A7I2V5D8;P51991	HNRPA3;HNRNPA3;HNRNPA3;HNRNPA3	Epididymis secretory sperm binding protein;Heterogeneous nuclear ribonucleoprotein A3;Heterogeneous nuclear ribonucleoprotein A3;Heterogeneous nuclear ribonucleoprotein A3	A0A384NL63	1	TINGHNCEVKKAL	Carbamidomethyl (C)	C	196	HTINGHNCEVKKALS	1	1	1	1	1	1	20102.6	21125.5	26057.1	13318	9476.7	12360.4	0.00785032	1.91395	0.936557	0.0591806	Up
A0A384NPY7_C202_M1	A0A384NPY7;A8K7T4;B4DWN1;Q12907	LMAN2;;;LMAN2	Epididymis secretory sperm binding protein;cDNA FLJ75774, highly similar to Homo sapiens lectin, mannose-binding 2 (LMAN2), mRNA;cDNA FLJ52285, highly similar to Vesicular integral-membrane protein VIP36;Vesicular integral-membrane protein VIP36	A0A384NPY7	1	WTELAGCTADFRN	Carbamidomethyl (C)	C	202	RWTELAGCTADFRNR	1	1	1	1	1	1	23732.2	30222.2	37737.6	19992.1	17761.2	19430.4	0.0485933	1.60347	0.681193	0.156149	Up
A0A384NPZ7_C86_M1	A0A384NPZ7;Q15738	;NSDHL	Epididymis secretory sperm binding protein;Sterol-4-alpha-carboxylate 3-dehydrogenase, decarboxylating	A0A384NPZ7	1	FFLGDLCSRQDLY	Carbamidomethyl (C)	C	86	RFFLGDLCSRQDLYP	1	1	1	1	1	1	9051.51	9133.39	9680.36	1337.51	4125.74	4912.81	0.00613723	2.68553	1.42521	0.0501403	Up
A0A384NYT8_C11_M1	A0A384NYT8;P07437;Q5SU16	;TUBB;TUBB	Tubulin beta chain (Fragment);Tubulin beta chain;Tubulin beta chain	A0A384NYT8	1	HIQAGQCGNQIGA	Carbamidomethyl (C)	C	11	VHIQAGQCGNQIGAK	1	1	1	1	1	1	85105.3	84736.9	62922.3	3754.42	7349.02	8435.77	0.000680756	11.9127	3.57443	0.013838	Up
A0A384P5G6_C608_M1	A0A384P5G6;B7Z4V2;P38646;V9HW84	;;HSPA9;HEL-S-124m	Stress-70 protein, mitochondrial;Stress-70 protein, mitochondrial;Stress-70 protein, mitochondrial;Stress-70 protein, mitochondrial	A0A384P5G6	1	QLPADECNKLKEE	Carbamidomethyl (C)	C	608	DQLPADECNKLKEEI	1	1	1	1	1	1	18606.3	24161.5	23903.5	13597.8	13867.7	15778.6	0.0156873	1.54174	0.624562	0.0812928	Up
A0A384P5S9_C2100_M1	A0A0D9SF54;A0A0D9SFF6;A0A384P5S9;A0A994J6W3;Q13813	SPTAN1;SPTAN1;;SPTAN1;SPTAN1	Spectrin alpha, non-erythrocytic 1;Spectrin alpha, non-erythrocytic 1;Epididymis secretory sperm binding protein;Spectrin alpha, non-erythrocytic 1;Spectrin alpha chain, non-erythrocytic 1	A0A384P5S9	1	LTDPVRCNSLEEI	Carbamidomethyl (C)	C	2100	DLTDPVRCNSLEEIK	1	1	1	1	1	1	277725	249539	353865	96764.2	124858	77519.3	0.00469237	2.94553	1.55853	0.0414069	Up
A0A3B3IS71_C438_M1	A0A3B3IS71;B4DTN0;P06400	RB1;;RB1	RB transcriptional corepressor 1;cDNA FLJ51085, highly similar to Retinoblastoma-associated protein;Retinoblastoma-associated protein	A0A3B3IS71	1	KAVGQGCVEIGSQ	Carbamidomethyl (C)	C	438	AKAVGQGCVEIGSQR	1		1	1			3632.39	3615.63	5088.44	1681.74	2107.01	2648.01	0.0249942	1.91656	0.93852	0.106743	Up
A0A3G2LMN0_C93_M1	A0A3G2LMN0;Q9BW60	ELOVL1	Elongation of very long chain fatty acids protein 1;Very long chain fatty acid elongase 1	A0A3G2LMN0	1	STYTWRCDPVDYS	Carbamidomethyl (C)	C	93	LSTYTWRCDPVDYSN	1	1	1	1	1		36513.7	41280.5	47209.9	14872.6	21790.4	33627.2	0.0441246	1.7784	0.830579	0.14949	Up
A0A3S6RFL8_C283_M1	A0A3S6RFL8	HLA-B	MHC class I antigen	A0A3S6RFL8	1	EEQRYTCHVQHEG	Carbamidomethyl (C)	C	283	GEEQRYTCHVQHEGL	1	1	1			1	18451.6	21716.5	19820	6793.48	6258.95	4303.8	0.000302525	3.45629	1.78922	0.0115412	Up
A0A494C0G1_C249_M1	A0A494C0G1;A0A8V8TLT8;A0A8V8TMH7;B3KN28;H0Y987;O95394	PGM3;PGM3;PGM3;;PGM3;PGM3	Phosphoacetylglucosamine mutase	A0A494C0G1	1	GKLNHLCGADFVK	Carbamidomethyl (C)	C	249	KGKLNHLCGADFVKS	1		1				82222.8	61053.6	101971	31576.4	21601.3	12022.6	0.0101561	3.76145	1.91129	0.0667536	Up
A0A494C1V1_C82_M1	A0A494C1V1;Q6ZNJ1	NBEAL2	Neurobeachin like 2;Neurobeachin-like protein 2	A0A494C1V1	1	KLFIILCRNLENI	Carbamidomethyl (C)	C	82	LKLFIILCRNLENIE	1	1	1	1	1	1	13957.2	10623.7	17979.2	1674.2	1589.8	793.924	0.00392155	10.4881	3.39069	0.0375129	Up
A0A4Y7LIQ4_C188_M1	A0A4Y7LIQ4	HLA-A	MHC class I antigen	A0A4Y7LIQ4	1	AYLDGTCVEWLRR	Carbamidomethyl (C)	C	188	RAYLDGTCVEWLRRY	1	1	1				215845	228945	314505	130191	148589	128850	0.0206285	1.86271	0.897404	0.0969002	Up
A0A5F9ZHL1_C196_M1	A0A140VJX1;A0A5F9ZHL1;P24752	;ACAT1;ACAT1	Acetyl-CoA acetyltransferase, mitochondrial;Acetyl-CoA acetyltransferase, mitochondrial;Acetyl-CoA acetyltransferase, mitochondrial	A0A5F9ZHL1	1	KIHMGSCAENTAK	Carbamidomethyl (C)	C	196	NKIHMGSCAENTAKK	1	1	1	1	1		8149.82	7096.88	9110.63	4870.6	2832.08	2184.32	0.00840104	2.46357	1.30075	0.060912	Up
A0A7I2ST14_C289_M1	A0A7I2ST14;B3KU62;Q597H1;Q92597	NDRG1;;TRG14;NDRG1	Protein NDRG1 (Fragment);Protein NDRG1;Protein NDRG1;Protein NDRG1	A0A7I2ST14	1	LLKMADCGGLPQI	Carbamidomethyl (C)	C	289	TLLKMADCGGLPQIS	1	1	1		1	1	99595.7	117481	80276.3	48123.1	23060.1	38582.2	0.00856304	2.70898	1.43775	0.0609132	Up
A0A7I2V2R3_C196_M1	A0A384NL63;A0A7I2V2R3;A0A7I2V5D8;P51991	HNRPA3;HNRNPA3;HNRNPA3;HNRNPA3	Epididymis secretory sperm binding protein;Heterogeneous nuclear ribonucleoprotein A3;Heterogeneous nuclear ribonucleoprotein A3;Heterogeneous nuclear ribonucleoprotein A3	A0A7I2V2R3	1	TINGHNCEVKKAL	Carbamidomethyl (C)	C	196	HTINGHNCEVKKALS	1	1	1	1	1	1	20102.6	21125.5	26057.1	13318	9476.7	12360.4	0.00785032	1.91395	0.936557	0.0591806	Up
A0A7I2V3F1_C393_M1	A0A0K0K1H7;A0A7I2V3F1;A0A7I2V3U0;A0A7I2V586;A2A274;B2RBW5;B4DZ08;Q99798	HEL-S-284;ACO2;ACO2;ACO2;ACO2;;;ACO2	Aconitate hydratase, mitochondrial;Aconitate hydratase, mitochondrial;Aconitate hydratase, mitochondrial;Aconitate hydratase, mitochondrial;Aconitase 2;Aconitate hydratase, mitochondrial;Aconitate hydratase, mitochondrial;Aconitate hydratase, mitochondrial	A0A7I2V3F1	1	VGLIGSCTNSSYE	Carbamidomethyl (C)	C	393	RVGLIGSCTNSSYED	1	1	1	1		1	7051.84	7923.69	4295.35	3352.39	2008.54	1147.78	0.0284222	2.96078	1.56598	0.113666	Up
A0A7I2V3U0_C330_M1	A0A0K0K1H7;A0A7I2V3F1;A0A7I2V3U0;A0A7I2V586;A2A274;B2RBW5;B4DZ08;Q99798	HEL-S-284;ACO2;ACO2;ACO2;ACO2;;;ACO2	Aconitate hydratase, mitochondrial;Aconitate hydratase, mitochondrial;Aconitate hydratase, mitochondrial;Aconitate hydratase, mitochondrial;Aconitase 2;Aconitate hydratase, mitochondrial;Aconitate hydratase, mitochondrial;Aconitate hydratase, mitochondrial	A0A7I2V3U0	1	VGLIGSCTNSSYE	Carbamidomethyl (C)	C	330	RVGLIGSCTNSSYED	1	1	1	1		1	7051.84	7923.69	4295.35	3352.39	2008.54	1147.78	0.0284222	2.96078	1.56598	0.113666	Up
A0A7I2V440_C336_M1	A0A024R374;A0A7I2V440;A0A7I2V668;A8K2H4;B4DL49;E9PHZ5;P07858	;CTSB;CTSB;;;CTSB;CTSB	Cathepsin B	A0A7I2V440	1	LRGQDHCGIESEV	Carbamidomethyl (C)	C	336	ILRGQDHCGIESEVV	1	1	1	1		1	84507	70969.9	69783	1095.78	3304.69	5514.37	0.000125506	22.7195	4.50586	0.00867311	Up
A0A7I2V440_C93_M1	A0A024R374;A0A7I2V440;A0A7I2V668;A8K2H4;B4DL49;E9PHZ5;P07858	;CTSB;CTSB;;;CTSB;CTSB	Cathepsin B	A0A7I2V440	1	REQWPQCPTIKEI	Carbamidomethyl (C)	C	93	AREQWPQCPTIKEIR	1	1	1		1	1	37300.7	38283.4	32572.9	10902.4	14138.8	18606.3	0.00164253	2.47796	1.30916	0.0242347	Up
A0A7I2V4J9_C455_M1	A0A7I2V4J9;G3XAI2;P07942	LAMB1	Laminin subunit beta 1;Laminin subunit beta 1;Laminin subunit beta-1	A0A7I2V4J9	1	SEDPFGCKSCACN	Carbamidomethyl (C)	C	455	SSEDPFGCKSCACNP	1	1	1	1	1	1	23519.9	21023.1	26379.2	2907.42	5271.01	9177.35	0.00172969	4.08637	2.03082	0.0244043	Up
A0A7I2V586_C352_M1	A0A0K0K1H7;A0A7I2V3F1;A0A7I2V3U0;A0A7I2V586;A2A274;B2RBW5;B4DZ08;Q99798	HEL-S-284;ACO2;ACO2;ACO2;ACO2;;;ACO2	Aconitate hydratase, mitochondrial;Aconitate hydratase, mitochondrial;Aconitate hydratase, mitochondrial;Aconitate hydratase, mitochondrial;Aconitase 2;Aconitate hydratase, mitochondrial;Aconitate hydratase, mitochondrial;Aconitate hydratase, mitochondrial	A0A7I2V586	1	VGLIGSCTNSSYE	Carbamidomethyl (C)	C	352	RVGLIGSCTNSSYED	1	1	1	1		1	7051.84	7923.69	4295.35	3352.39	2008.54	1147.78	0.0284222	2.96078	1.56598	0.113666	Up
A0A7I2V5D8_C196_M1	A0A384NL63;A0A7I2V2R3;A0A7I2V5D8;P51991	HNRPA3;HNRNPA3;HNRNPA3;HNRNPA3	Epididymis secretory sperm binding protein;Heterogeneous nuclear ribonucleoprotein A3;Heterogeneous nuclear ribonucleoprotein A3;Heterogeneous nuclear ribonucleoprotein A3	A0A7I2V5D8	1	TINGHNCEVKKAL	Carbamidomethyl (C)	C	196	HTINGHNCEVKKALS	1	1	1	1	1	1	20102.6	21125.5	26057.1	13318	9476.7	12360.4	0.00785032	1.91395	0.936557	0.0591806	Up
A0A7I2V668_C21_M1	A0A024R374;A0A7I2V440;A0A7I2V668;A8K2H4;B4DL49;E9PHZ5;P07858	;CTSB;CTSB;;;CTSB;CTSB	Cathepsin B	A0A7I2V668	1	REQWPQCPTIKEI	Carbamidomethyl (C)	C	21	AREQWPQCPTIKEIR	1	1	1		1	1	37300.7	38283.4	32572.9	10902.4	14138.8	18606.3	0.00164253	2.47796	1.30916	0.0242347	Up
A0A7I2V668_C247_M1	A0A024R374;A0A7I2V440;A0A7I2V668;A8K2H4;B4DL49;E9PHZ5;P07858	;CTSB;CTSB;;;CTSB;CTSB	Cathepsin B	A0A7I2V668	1	LRGQDHCGIESEV	Carbamidomethyl (C)	C	247	ILRGQDHCGIESEVV	1	1	1	1		1	84507	70969.9	69783	1095.78	3304.69	5514.37	0.000125506	22.7195	4.50586	0.00867311	Up
A0A7P0T855_C66_M1	A0A7P0T855;O14879;Q5T765	IFIT3	Interferon induced protein with tetratricopeptide repeats 3;Interferon-induced protein with tetratricopeptide repeats 3;Interferon-induced protein with tetratricopeptide repeats 3, isoform CRA_a	A0A7P0T855	1	DLEDRVCNQIEFL	Carbamidomethyl (C)	C	66	RDLEDRVCNQIEFLN			1				41149.8	28101.9	40397.1	26736.7	20804.8	13468.9	0.0469144	1.79722	0.845765	0.153903	Up
A0A7P0T8B3_C139_M1	A0A7P0T8B3;A0A7P0TAT2;B4DTZ5;P09913;Q8IZ03	IFIT2;IFIT2;;IFIT2;IFIT2	Interferon induced protein with tetratricopeptide repeats 2 (Fragment);Interferon induced protein with tetratricopeptide repeats 2;cDNA FLJ60157, highly similar to Interferon-induced protein with tetratricopeptide repeats 2;Interferon-induced protein with tetratricopeptide repeats 2;Interferon-induced protein with tetratricopeptide repeats 2	A0A7P0T8B3	1	ESPELDCEEGWTR	Carbamidomethyl (C)	C	139	IESPELDCEEGWTRL							86672.2	84766.5	57182.2	29825	23162	36826.6	0.0109342	2.5455	1.34795	0.0677918	Up
A0A7P0T937_C360_M1	A0A7P0T937;A0A7P0TAE9;A0A7P0TB65;P27824	CANX	Calnexin	A0A7P0T937	1	QIANPRCESAPGC	Carbamidomethyl (C)	C	360	PQIANPRCESAPGCG	0.997924	0.999065	0.999294				30705.4	37174.8	42370.6	23223.5	21847.1	21568.3	0.0130559	1.65445	0.726354	0.073574	Up
A0A7P0T9I9_C39_M1	A0A7P0T9I9;P43490	NAMPT	Nicotinamide phosphoribosyltransferase	A0A7P0T9I9	1	VYSYFECREKKTE	Carbamidomethyl (C)	C	39	KVYSYFECREKKTEN	1	1	1	1	1	1	30988.2	32235.9	34058.2	16948.4	15506.4	20023.8	0.00073853	1.85375	0.890449	0.0145439	Up
A0A7P0T9I9_C394_M1	A0A7P0T9I9;P43490	NAMPT	Nicotinamide phosphoribosyltransferase	A0A7P0T9I9	1	TRDLLNCSFKCSY	Carbamidomethyl (C)	C	394	LTRDLLNCSFKCSYV	1	1	1	1	1	1	28105.6	20433.5	20515.8	13145	11593.1	13402.4	0.0167531	1.81054	0.856419	0.0842297	Up
A0A7P0T9W6_C824_M1	A0A7P0T9W6;A0A7P0Z4D0;A8KA84;Q9Y6K5	OAS3;OAS3;;OAS3	2'-5' oligoadenylate synthase;2'-5' oligoadenylate synthase;2'-5' oligoadenylate synthase;2'-5'-oligoadenylate synthase 3	A0A7P0T9W6	1	RAQLEACQQERQF	Carbamidomethyl (C)	C	824	IRAQLEACQQERQFE	1	1	1			1	41380.9	42600	37411.7	30648.9	13736.6	9163.52	0.0281602	2.26694	1.18075	0.113666	Up
A0A7P0TAE9_C394_M1	A0A7P0T937;A0A7P0TAE9;A0A7P0TB65;P27824	CANX	Calnexin	A0A7P0TAE9	1	QIANPRCESAPGC	Carbamidomethyl (C)	C	394	PQIANPRCESAPGCG	0.997924	0.999065	0.999294				30705.4	37174.8	42370.6	23223.5	21847.1	21568.3	0.0130559	1.65445	0.726354	0.073574	Up
A0A7P0TAG1_C291_M1	A0A7P0TAG1;A0A7P0TAX2;A0A7P0TBE2;B4DJX1;P10515;Q86YI5	DLAT;DLAT;DLAT;;DLAT;DLAT	Dihydrolipoamide acetyltransferase component of pyruvate dehydrogenase complex;Acetyltransferase component of pyruvate dehydrogenase complex;Acetyltransferase component of pyruvate dehydrogenase complex;Acetyltransferase component of pyruvate dehydrogenase complex;Dihydrolipoyllysine-residue acetyltransferase component of pyruvate dehydrogenase complex, mitochondrial;Acetyltransferase component o…	A0A7P0TAG1	1	PLGTPLCIIVEKE	Carbamidomethyl (C)	C	291	VPLGTPLCIIVEKEA	1	1	1	1	1	1	35200.1	86595.8	66023.3	15809.4	8357.01	15350.1	0.0308556	4.75293	2.24882	0.117998	Up
A0A7P0TAT2_C116_M1	A0A7P0T8B3;A0A7P0TAT2;B4DTZ5;P09913;Q8IZ03	IFIT2;IFIT2;;IFIT2;IFIT2	Interferon induced protein with tetratricopeptide repeats 2 (Fragment);Interferon induced protein with tetratricopeptide repeats 2;cDNA FLJ60157, highly similar to Interferon-induced protein with tetratricopeptide repeats 2;Interferon-induced protein with tetratricopeptide repeats 2;Interferon-induced protein with tetratricopeptide repeats 2	A0A7P0TAT2	1	ESPELDCEEGWTR	Carbamidomethyl (C)	C	116	IESPELDCEEGWTRL							86672.2	84766.5	57182.2	29825	23162	36826.6	0.0109342	2.5455	1.34795	0.0677918	Up
A0A7P0TAW3_C105_M1	A0A7P0TAW3;P55072	VCP	Transitional endoplasmic reticulum ATPase	A0A7P0TAW3	1	VISIQPCPDVKYG	Carbamidomethyl (C)	C	105	DVISIQPCPDVKYGK	1	1	1	1	1	1	60251.4	65730.8	60029.8	36369	36445.7	33589.9	0.000220726	1.74816	0.805836	0.0115412	Up
A0A7P0TAX2_C291_M1	A0A7P0TAG1;A0A7P0TAX2;A0A7P0TBE2;B4DJX1;P10515;Q86YI5	DLAT;DLAT;DLAT;;DLAT;DLAT	Dihydrolipoamide acetyltransferase component of pyruvate dehydrogenase complex;Acetyltransferase component of pyruvate dehydrogenase complex;Acetyltransferase component of pyruvate dehydrogenase complex;Acetyltransferase component of pyruvate dehydrogenase complex;Dihydrolipoyllysine-residue acetyltransferase component of pyruvate dehydrogenase complex, mitochondrial;Acetyltransferase component o…	A0A7P0TAX2	1	PLGTPLCIIVEKE	Carbamidomethyl (C)	C	291	VPLGTPLCIIVEKEA	1	1	1	1	1	1	35200.1	86595.8	66023.3	15809.4	8357.01	15350.1	0.0308556	4.75293	2.24882	0.117998	Up
A0A7P0TB65_C360_M1	A0A7P0T937;A0A7P0TAE9;A0A7P0TB65;P27824	CANX	Calnexin	A0A7P0TB65	1	QIANPRCESAPGC	Carbamidomethyl (C)	C	360	PQIANPRCESAPGCG	0.997924	0.999065	0.999294				30705.4	37174.8	42370.6	23223.5	21847.1	21568.3	0.0130559	1.65445	0.726354	0.073574	Up
A0A7P0TBE2_C291_M1	A0A7P0TAG1;A0A7P0TAX2;A0A7P0TBE2;B4DJX1;P10515;Q86YI5	DLAT;DLAT;DLAT;;DLAT;DLAT	Dihydrolipoamide acetyltransferase component of pyruvate dehydrogenase complex;Acetyltransferase component of pyruvate dehydrogenase complex;Acetyltransferase component of pyruvate dehydrogenase complex;Acetyltransferase component of pyruvate dehydrogenase complex;Dihydrolipoyllysine-residue acetyltransferase component of pyruvate dehydrogenase complex, mitochondrial;Acetyltransferase component o…	A0A7P0TBE2	1	PLGTPLCIIVEKE	Carbamidomethyl (C)	C	291	VPLGTPLCIIVEKEA	1	1	1	1	1	1	35200.1	86595.8	66023.3	15809.4	8357.01	15350.1	0.0308556	4.75293	2.24882	0.117998	Up
A0A7P0Z4B9_C260_M1	A0A7P0Z4B9;B7Z2A1;F5GY55;Q16531	DDB1;;DDB1;DDB1	DNA damage-binding protein 1	A0A7P0Z4B9	1	KQSTIVCHNRVDP	Carbamidomethyl (C)	C	260	IKQSTIVCHNRVDPN	1	1	1	1	1		5501.54	4772.14	7153.32	3308.66	3999.28	3895.15	0.0479681	1.55555	0.637429	0.154977	Up
A0A7P0Z4D0_C825_M1	A0A7P0T9W6;A0A7P0Z4D0;A8KA84;Q9Y6K5	OAS3;OAS3;;OAS3	2'-5' oligoadenylate synthase;2'-5' oligoadenylate synthase;2'-5' oligoadenylate synthase;2'-5'-oligoadenylate synthase 3	A0A7P0Z4D0	1	RAQLEACQQERQF	Carbamidomethyl (C)	C	825	IRAQLEACQQERQFE	1	1	1			1	41380.9	42600	37411.7	30648.9	13736.6	9163.52	0.0281602	2.26694	1.18075	0.113666	Up
A0A804HII9_C332_M1	A0A804HII9	ACTN1	Alpha-actinin-1	A0A804HII9	1	PKVQEKCQLEINF	Carbamidomethyl (C)	C	332	PPKVQEKCQLEINFN	1	1	1	1	1		34490.7	27896.4	21129.8	11212.4	13542.1	19261.2	0.0440553	1.89743	0.924048	0.14949	Up
A0A804HII9_C41_M1	A0A804HII9	ACTN1	Alpha-actinin-1	A0A804HII9	1	KTFTAWCNSHLRK	Carbamidomethyl (C)	C	41	RKTFTAWCNSHLRKA	1	1	1	1	1	1	77019.9	79107.9	64633.4	42199.2	18748.1	14349.7	0.00764285	2.93187	1.55182	0.0582597	Up
A0A804HJN6_C433_M1	A0A804HJN6;A0A804HL54;P41252;Q59G75	IARS1;IARS1;IARS1;	isoleucine--tRNA ligase;isoleucine--tRNA ligase;Isoleucine--tRNA ligase, cytoplasmic;isoleucine--tRNA ligase (Fragment)	A0A804HJN6	1	LRNNDLCYWVPEL	Carbamidomethyl (C)	C	433	LLRNNDLCYWVPELV	1	1	1				102013	127952	107766	22653.6	42180.4	28452	0.00112803	3.62037	1.85614	0.0187914	Up
A0A804HL54_C433_M1	A0A804HJN6;A0A804HL54;P41252;Q59G75	IARS1;IARS1;IARS1;	isoleucine--tRNA ligase;isoleucine--tRNA ligase;Isoleucine--tRNA ligase, cytoplasmic;isoleucine--tRNA ligase (Fragment)	A0A804HL54	1	LRNNDLCYWVPEL	Carbamidomethyl (C)	C	433	LLRNNDLCYWVPELV	1	1	1				102013	127952	107766	22653.6	42180.4	28452	0.00112803	3.62037	1.85614	0.0187914	Up
A0A8I5KWT8_C172_M1	A0A8I5KWT8;P35579	MYH9	Myosin-9	A0A8I5KWT8	1	EDQSILCTGESGA	Carbamidomethyl (C)	C	172	REDQSILCTGESGAG	1	1	1	1	1	1	491516	423147	408211	83354.3	180343	212206	0.00370724	2.77971	1.47494	0.0367595	Up
A0A8V8TKT5_C82_M1	A0A8V8TKT5;Q9UEW8;X5D2U3;X5D7P8;X5DP03	STK39	non-specific serine/threonine protein kinase;STE20/SPS1-related proline-alanine-rich protein kinase;non-specific serine/threonine protein kinase (Fragment);non-specific serine/threonine protein kinase (Fragment);non-specific serine/threonine protein kinase (Fragment)	A0A8V8TKT5	1	VVQAALCKPRQER	Carbamidomethyl (C)	C	82	AVVQAALCKPRQERV				1	1	1	4576.34	7264.12	5673.16	380.476	548.383	692.256	0.00251887	10.8034	3.43342	0.028769	Up
A0A8V8TLT8_C249_M1	A0A494C0G1;A0A8V8TLT8;A0A8V8TMH7;B3KN28;H0Y987;O95394	PGM3;PGM3;PGM3;;PGM3;PGM3	Phosphoacetylglucosamine mutase	A0A8V8TLT8	1	GKLNHLCGADFVK	Carbamidomethyl (C)	C	249	KGKLNHLCGADFVKS	1		1				82222.8	61053.6	101971	31576.4	21601.3	12022.6	0.0101561	3.76145	1.91129	0.0667536	Up
A0A8V8TMH7_C249_M1	A0A494C0G1;A0A8V8TLT8;A0A8V8TMH7;B3KN28;H0Y987;O95394	PGM3;PGM3;PGM3;;PGM3;PGM3	Phosphoacetylglucosamine mutase	A0A8V8TMH7	1	GKLNHLCGADFVK	Carbamidomethyl (C)	C	249	KGKLNHLCGADFVKS	1		1				82222.8	61053.6	101971	31576.4	21601.3	12022.6	0.0101561	3.76145	1.91129	0.0667536	Up
A0A8V8TND7_C304_M1	A0A0A0MS51;A0A0A0MT01;A0A384MEF1;A0A8V8TND7;B7Z6N2;B7Z992;B7Z9A0;P06396	GSN;GSN;;GSN;;;;GSN	Gelsolin	A0A8V8TND7	1	ALKSEDCFILDHG	Carbamidomethyl (C)	C	304	GALKSEDCFILDHGK	1	1	1	1			19045.3	23749.8	20873	10867.9	6458.65	9634.61	0.00297597	2.36147	1.23969	0.0313966	Up
A0A8V8TP24_C115_M1	A0A024RCT1;A0A0A0MSV9;A0A0G2JH37;A0A0G2JKZ1;A0A1U9X8L5;A0A8V8TP24;A0A8V8TQC5;A2AB90;C9JA35;O15533	;TAPBP;TAPBP;TAPBP;;TAPBP;TAPBP;TAPBP;TAPBP;TAPBP	Tapasin	A0A8V8TP24	1	LTPAQNCPRALDG	Carbamidomethyl (C)	C	115	GLTPAQNCPRALDGA	1	1	1	1			68158.1	90622.3	70934.2	8633.48	3121	2934.41	0.000607721	15.6387	3.96705	0.0133036	Up
A0A8V8TQ14_C464_M1	A0A087WVQ6;A0A8V8TQ14;A0A8V8TR47;A0A8V8TRF0;K7EJJ5;Q00610	CLTC	Clathrin heavy chain;Clathrin heavy chain;Clathrin heavy chain;Clathrin heavy chain;Clathrin heavy chain;Clathrin heavy chain 1	A0A8V8TQ14	1	KEDKLECSEELGD	Carbamidomethyl (C)	C	464	LKEDKLECSEELGDL	1	1	1	1	1		97935.6	142646	117894	75123.2	68414.4	56725.6	0.0196751	1.79002	0.839979	0.0937327	Up
A0A8V8TQ14_C875_M1	A0A087WVQ6;A0A8V8TQ14;A0A8V8TR47;A0A8V8TRF0;K7EJJ5;Q00610	CLTC	Clathrin heavy chain;Clathrin heavy chain;Clathrin heavy chain;Clathrin heavy chain;Clathrin heavy chain;Clathrin heavy chain 1	A0A8V8TQ14	1	ARIHEGCEEPATH	Carbamidomethyl (C)	C	875	EARIHEGCEEPATHN	1	1	1	1		1	7323.48	8873.33	8510.14	2303.32	3865.01	898.935	0.00382685	3.49597	1.80569	0.0370233	Up
A0A8V8TQC5_C115_M1	A0A024RCT1;A0A0A0MSV9;A0A0G2JH37;A0A0G2JKZ1;A0A1U9X8L5;A0A8V8TP24;A0A8V8TQC5;A2AB90;C9JA35;O15533	;TAPBP;TAPBP;TAPBP;;TAPBP;TAPBP;TAPBP;TAPBP;TAPBP	Tapasin	A0A8V8TQC5	1	LTPAQNCPRALDG	Carbamidomethyl (C)	C	115	GLTPAQNCPRALDGA	1	1	1	1			68158.1	90622.3	70934.2	8633.48	3121	2934.41	0.000607721	15.6387	3.96705	0.0133036	Up
A0A8V8TR47_C459_M1	A0A087WVQ6;A0A8V8TQ14;A0A8V8TR47;A0A8V8TRF0;K7EJJ5;Q00610	CLTC	Clathrin heavy chain;Clathrin heavy chain;Clathrin heavy chain;Clathrin heavy chain;Clathrin heavy chain;Clathrin heavy chain 1	A0A8V8TR47	1	KEDKLECSEELGD	Carbamidomethyl (C)	C	459	LKEDKLECSEELGDL	1	1	1	1	1		97935.6	142646	117894	75123.2	68414.4	56725.6	0.0196751	1.79002	0.839979	0.0937327	Up
A0A8V8TR47_C874_M1	A0A087WVQ6;A0A8V8TQ14;A0A8V8TR47;A0A8V8TRF0;K7EJJ5;Q00610	CLTC	Clathrin heavy chain;Clathrin heavy chain;Clathrin heavy chain;Clathrin heavy chain;Clathrin heavy chain;Clathrin heavy chain 1	A0A8V8TR47	1	ARIHEGCEEPATH	Carbamidomethyl (C)	C	874	EARIHEGCEEPATHN	1	1	1	1		1	7323.48	8873.33	8510.14	2303.32	3865.01	898.935	0.00382685	3.49597	1.80569	0.0370233	Up
A0A8V8TRF0_C460_M1	A0A087WVQ6;A0A8V8TQ14;A0A8V8TR47;A0A8V8TRF0;K7EJJ5;Q00610	CLTC	Clathrin heavy chain;Clathrin heavy chain;Clathrin heavy chain;Clathrin heavy chain;Clathrin heavy chain;Clathrin heavy chain 1	A0A8V8TRF0	1	KEDKLECSEELGD	Carbamidomethyl (C)	C	460	LKEDKLECSEELGDL	1	1	1	1	1		97935.6	142646	117894	75123.2	68414.4	56725.6	0.0196751	1.79002	0.839979	0.0937327	Up
A0A8V8TRF0_C871_M1	A0A087WVQ6;A0A8V8TQ14;A0A8V8TR47;A0A8V8TRF0;K7EJJ5;Q00610	CLTC	Clathrin heavy chain;Clathrin heavy chain;Clathrin heavy chain;Clathrin heavy chain;Clathrin heavy chain;Clathrin heavy chain 1	A0A8V8TRF0	1	ARIHEGCEEPATH	Carbamidomethyl (C)	C	871	EARIHEGCEEPATHN	1	1	1	1		1	7323.48	8873.33	8510.14	2303.32	3865.01	898.935	0.00382685	3.49597	1.80569	0.0370233	Up
A0A994J491_C1851_M1	A0A994J491;A0A994J6E8;Q6P2Q9	PRPF8	Pre-mRNA processing factor 8;Pre-mRNA processing factor 8;Pre-mRNA-processing-splicing factor 8	A0A994J491	1	QLPFQACLKVEKF	Carbamidomethyl (C)	C	1851	LQLPFQACLKVEKFG	1	1	1	1			26157.7	16534.4	16657.4	6318.21	4447.77	2934.41	0.010311	4.33195	2.11502	0.0668162	Up
A0A994J4E9_C121_M1	A0A994J4E9;A0A994J6U9;B4DUQ1	HNRNPK	Heterogeneous nuclear ribonucleoprotein K	A0A994J4E9	1	KGSDFDCELRLLI	Carbamidomethyl (C)	C	121	YKGSDFDCELRLLIH	1	1	1	1	1	1	239052	241848	214467	168188	143688	147909	0.00242573	1.51237	0.596814	0.0285651	Up
A0A994J5B1_C488_M1	A0A994J5B1	EPB41L2	Erythrocyte membrane protein band 4.1 like 2	A0A994J5B1	1	KRLWKVCVEHHTF	Carbamidomethyl (C)	C	488	AKRLWKVCVEHHTFY	1		1	1			8407.67	7360	7448.39	1562.58	1535.45	2322.06	0.000150126	4.28334	2.09874	0.00932143	Up
A0A994J6E8_C1847_M1	A0A994J491;A0A994J6E8;Q6P2Q9	PRPF8	Pre-mRNA processing factor 8;Pre-mRNA processing factor 8;Pre-mRNA-processing-splicing factor 8	A0A994J6E8	1	QLPFQACLKVEKF	Carbamidomethyl (C)	C	1847	LQLPFQACLKVEKFG	1	1	1	1			26157.7	16534.4	16657.4	6318.21	4447.77	2934.41	0.010311	4.33195	2.11502	0.0668162	Up
A0A994J6T1_C190_M1	A0A994J6T1;A4D2P0;A4D2P1;P63000	RAC1	Ras-related C3 botulinum toxin substrate 1	A0A994J6T1	1	AVKYLECSALTQR	Carbamidomethyl (C)	C	190	GAVKYLECSALTQRG	1	1	1	1	1	1	155231	163454	140587	67031.1	92086.4	74629.7	0.00166769	1.96482	0.974397	0.0242347	Up
A0A994J6U9_C121_M1	A0A994J4E9;A0A994J6U9;B4DUQ1	HNRNPK	Heterogeneous nuclear ribonucleoprotein K	A0A994J6U9	1	KGSDFDCELRLLI	Carbamidomethyl (C)	C	121	YKGSDFDCELRLLIH	1	1	1	1	1	1	239052	241848	214467	168188	143688	147909	0.00242573	1.51237	0.596814	0.0285651	Up
A0A994J6W3_C2125_M1	A0A0D9SF54;A0A0D9SFF6;A0A384P5S9;A0A994J6W3;Q13813	SPTAN1;SPTAN1;;SPTAN1;SPTAN1	Spectrin alpha, non-erythrocytic 1;Spectrin alpha, non-erythrocytic 1;Epididymis secretory sperm binding protein;Spectrin alpha, non-erythrocytic 1;Spectrin alpha chain, non-erythrocytic 1	A0A994J6W3	1	LTDPVRCNSLEEI	Carbamidomethyl (C)	C	2125	DLTDPVRCNSLEEIK	1	1	1	1	1	1	277725	249539	353865	96764.2	124858	77519.3	0.00469237	2.94553	1.55853	0.0414069	Up
A0A994J749_C820_M1	A0A994J749	IMPDH	Inosine-5'-monophosphate dehydrogenase	A0A994J749	1	KARHGFCGIPITD	Carbamidomethyl (C)	C	820	AKARHGFCGIPITDT	1	1	1				30735.7	28999.6	39215.1	19555.2	11351.3	4239.25	0.0173486	2.81543	1.49336	0.0862378	Up
A0A9L9PX63_C133_M1	A0A9L9PX63;A0A9L9PY11;Q13242	SRSF9	Serine and arginine rich splicing factor 9;Serine and arginine rich splicing factor 9;Serine/arginine-rich splicing factor 9	A0A9L9PX63	1	REAGDVCYADVQK	Carbamidomethyl (C)	C	133	MREAGDVCYADVQKD	1	1	1	1	1	1	28669.5	23153.2	23243.1	7630.68	11039.2	4133.47	0.00297877	3.29187	1.71891	0.0313966	Up
A0A9L9PY11_C111_M1	A0A9L9PX63;A0A9L9PY11;Q13242	SRSF9	Serine and arginine rich splicing factor 9;Serine and arginine rich splicing factor 9;Serine/arginine-rich splicing factor 9	A0A9L9PY11	1	REAGDVCYADVQK	Carbamidomethyl (C)	C	111	MREAGDVCYADVQKD	1	1	1	1	1	1	28669.5	23153.2	23243.1	7630.68	11039.2	4133.47	0.00297877	3.29187	1.71891	0.0313966	Up
A0A9L9PYI8_C411_M1	A0A2U3TZH3;A0A9L9PYI8;Q05639	EEF1A2	Elongation factor 1-alpha;Elongation factor 1-alpha 2;Elongation factor 1-alpha 2	A0A9L9PYI8	1	VPGKPMCVESFSQ	Carbamidomethyl (C)	C	411	MVPGKPMCVESFSQY	1	1	1	1	1	1	42578.9	41286.8	32309.1	3657.08	5083.32	1292.35	0.000489103	11.5796	3.53351	0.0121466	Up
A0AA34QVH5_C210_M1	A0AA34QVH5;Q86X55	CARM1	Coactivator associated arginine methyltransferase 1;Histone-arginine methyltransferase CARM1	A0AA34QVH5	1	IVLDVGCGSGILS	Carbamidomethyl (C)	C	210	KIVLDVGCGSGILSF				1		1	22131.8	21816.8	20759.6	1640.4	2001.52	666.807	3.9814e-06	15.018	3.90862	0.00300967	Up
A2A274_C410_M1	A0A0K0K1H7;A0A7I2V3F1;A0A7I2V3U0;A0A7I2V586;A2A274;B2RBW5;B4DZ08;Q99798	HEL-S-284;ACO2;ACO2;ACO2;ACO2;;;ACO2	Aconitate hydratase, mitochondrial;Aconitate hydratase, mitochondrial;Aconitate hydratase, mitochondrial;Aconitate hydratase, mitochondrial;Aconitase 2;Aconitate hydratase, mitochondrial;Aconitate hydratase, mitochondrial;Aconitate hydratase, mitochondrial	A2A274	1	VGLIGSCTNSSYE	Carbamidomethyl (C)	C	410	RVGLIGSCTNSSYED	1	1	1	1		1	7051.84	7923.69	4295.35	3352.39	2008.54	1147.78	0.0284222	2.96078	1.56598	0.113666	Up
A2AB90_C115_M1	A0A024RCT1;A0A0A0MSV9;A0A0G2JH37;A0A0G2JKZ1;A0A1U9X8L5;A0A8V8TP24;A0A8V8TQC5;A2AB90;C9JA35;O15533	;TAPBP;TAPBP;TAPBP;;TAPBP;TAPBP;TAPBP;TAPBP;TAPBP	Tapasin	A2AB90	1	LTPAQNCPRALDG	Carbamidomethyl (C)	C	115	GLTPAQNCPRALDGA	1	1	1	1			68158.1	90622.3	70934.2	8633.48	3121	2934.41	0.000607721	15.6387	3.96705	0.0133036	Up
A3KLL5_C213_M1	A3KLL5;P05026;Q6LEU2	ATP1B1	Sodium/potassium-transporting ATPase subunit beta;Sodium/potassium-transporting ATPase subunit beta-1;Sodium/potassium-transporting ATPase subunit beta (Fragment)	A3KLL5	1	NVLPVQCTGKRDE	Carbamidomethyl (C)	C	213	PNVLPVQCTGKRDED	1	1	1			1	141571	136270	136491	59063.6	49370	35287.7	0.000223066	2.88289	1.52751	0.0115412	Up
A4D177_C177_M1	A4D177;Q13185	CBX3	Chromobox homolog 3 (HP1 gamma homolog, Drosophila);Chromobox protein homolog 3	A4D177	1	RLTWHSCPEDEAQ	Carbamidomethyl (C)	C	177	ERLTWHSCPEDEAQ_	1	1	1	1	1	1	37786.5	49388.2	41015.2	25458.1	13877.6	11445.9	0.0095782	2.52434	1.33591	0.0649877	Up
A4D212_C1959_M1	A4D212;A4D213;Q8N201	DKFZP586J0619;DKFZP586J0619;INTS1	DKFZP586J0619 protein;DKFZP586J0619 protein;Integrator complex subunit 1	A4D212	1	DGDTAACSLIQAR	Carbamidomethyl (C)	C	1959	QDGDTAACSLIQARL	1	1	1	1	1	1	130253	134582	148313	89501.5	81940.7	91608.8	0.00126892	1.5706	0.651316	0.0202709	Up
A4D213_C1973_M1	A4D212;A4D213;Q8N201	DKFZP586J0619;DKFZP586J0619;INTS1	DKFZP586J0619 protein;DKFZP586J0619 protein;Integrator complex subunit 1	A4D213	1	DGDTAACSLIQAR	Carbamidomethyl (C)	C	1973	QDGDTAACSLIQARL	1	1	1	1	1	1	130253	134582	148313	89501.5	81940.7	91608.8	0.00126892	1.5706	0.651316	0.0202709	Up
A4D2P0_C176_M1	A0A994J6T1;A4D2P0;A4D2P1;P63000	RAC1	Ras-related C3 botulinum toxin substrate 1	A4D2P0	1	AVKYLECSALTQR	Carbamidomethyl (C)	C	176	GAVKYLECSALTQRG	1	1	1	1	1	1	155231	163454	140587	67031.1	92086.4	74629.7	0.00166769	1.96482	0.974397	0.0242347	Up
A4D2P1_C157_M1	A0A994J6T1;A4D2P0;A4D2P1;P63000	RAC1	Ras-related C3 botulinum toxin substrate 1	A4D2P1	1	AVKYLECSALTQR	Carbamidomethyl (C)	C	157	GAVKYLECSALTQRG	1	1	1	1	1	1	155231	163454	140587	67031.1	92086.4	74629.7	0.00166769	1.96482	0.974397	0.0242347	Up
A4D2Q0_C688_M1	A0A146IHP0;A4D2Q0;A7MCZ7;E9PHI4;O94901	SUN1;UNC84A;UNC84A;SUN1;SUN1	SUN domain-containing protein 1;Unc-84 homolog A (C. elegans);UNC84A protein;Sad1 and UNC84 domain containing 1;SUN domain-containing protein 1	A4D2Q0	1	RHVKTGCETVDAV	Carbamidomethyl (C)	C	688	WRHVKTGCETVDAVQ	1	1	1		1		108675	156317	193464	59521.6	61916.4	19838.2	0.0196797	3.24511	1.69827	0.0937327	Up
A4GYY8_C200_M1	A0A023T695;A0A024RA87;A4GYY8;B4DNE4;B4DPQ6;B4DUD6;E7EPK1;E7ES33;G3V1Q4;Q16181;Q3LIE9;Q8TC62	;SEPTIN7;DKFZp686F17268;;;;SEPTIN7;SEPTIN7;SEPTIN7;SEPTIN7;Nbla02942;SEPT7	Septin;Septin;Septin-7 (Fragment);Septin;Septin;Septin;Septin;Septin;Septin;Septin-7;Septin;Septin	A4GYY8	1	TLTPEECQQFKKQ	Carbamidomethyl (C)	C	200	DTLTPEECQQFKKQI	1	1	1	1	1	1	24626.3	17542.8	22432.3	7963.77	6630.75	10331.2	0.00495434	2.59175	1.37393	0.0421922	Up
A5YM53_C158_M1	A5YM53	ITGAV	ITGAV protein	A5YM53	1	REPVGTCFLQDGT	Carbamidomethyl (C)	C	158	EREPVGTCFLQDGTK	1	1	1	1			58363.2	84330.5	114331	11249.5	3121	2934.41	0.00820789	14.8527	3.89266	0.059893	Up
A6NHB5_C500_M1	A6NHB5;Q14202	ZMYM3	Zinc finger MYM-type containing 3;Zinc finger MYM-type protein 3	A6NHB5	1	NTRVYPCVWCKTL	Carbamidomethyl (C)	C	500	KNTRVYPCVWCKTLC	0.87967	0.825693	0.0551342	0.5	0.209281	0.5	89976.4	113529	80473.4	61302.2	34692.6	63801.9	0.0377534	1.77713	0.829548	0.136536	Up
A7MCZ7_C526_M1	A0A146IHP0;A4D2Q0;A7MCZ7;E9PHI4;O94901	SUN1;UNC84A;UNC84A;SUN1;SUN1	SUN domain-containing protein 1;Unc-84 homolog A (C. elegans);UNC84A protein;Sad1 and UNC84 domain containing 1;SUN domain-containing protein 1	A7MCZ7	1	RHVKTGCETVDAV	Carbamidomethyl (C)	C	526	WRHVKTGCETVDAVQ	1	1	1		1		108675	156317	193464	59521.6	61916.4	19838.2	0.0196797	3.24511	1.69827	0.0937327	Up
A8K0G3_C391_M1	A0A140VJE8;A8K0G3;A8K916;P63010	AP2B1;;;AP2B1	AP complex subunit beta;AP complex subunit beta;AP complex subunit beta;AP-2 complex subunit beta	A8K0G3	1	EQSAERCVSTLLD	Carbamidomethyl (C)	C	391	VEQSAERCVSTLLDL	1	1	1	1			5567.01	6930.88	6434.56	1869.95	1979.61	1742.98	0.00038865	3.38531	1.75929	0.0115412	Up
A8K2H4_C319_M1	A0A024R374;A0A7I2V440;A0A7I2V668;A8K2H4;B4DL49;E9PHZ5;P07858	;CTSB;CTSB;;;CTSB;CTSB	Cathepsin B	A8K2H4	1	LRGQDHCGIESEV	Carbamidomethyl (C)	C	319	ILRGQDHCGIESEVV	1	1	1	1		1	84507	70969.9	69783	1095.78	3304.69	5514.37	0.000125506	22.7195	4.50586	0.00867311	Up
A8K2H4_C93_M1	A0A024R374;A0A7I2V440;A0A7I2V668;A8K2H4;B4DL49;E9PHZ5;P07858	;CTSB;CTSB;;;CTSB;CTSB	Cathepsin B	A8K2H4	1	REQWPQCPTIKEI	Carbamidomethyl (C)	C	93	AREQWPQCPTIKEIR	1	1	1		1	1	37300.7	38283.4	32572.9	10902.4	14138.8	18606.3	0.00164253	2.47796	1.30916	0.0242347	Up
A8K486_C161_M1	A8K486;P62937;V9HWF5	;PPIA;HEL-S-69p	Peptidyl-prolyl cis-trans isomerase;Peptidyl-prolyl cis-trans isomerase A;Peptidyl-prolyl cis-trans isomerase	A8K486	1	KITIADCGQLE__	Carbamidomethyl (C)	C	161	KKITIADCGQLE___	1	1	1	1	1	1	312635	340413	523754	170199	193579	138779	0.0299348	2.34163	1.22751	0.116036	Up
A8K4Z4_C119_M1	A8K4Z4;F8VWS0;P05388;Q53HW2;Q6NSF2	;RPLP0;RPLP0;;RPLP0	60S acidic ribosomal protein P0;60S acidic ribosomal protein P0;Large ribosomal subunit protein uL10;60S acidic ribosomal protein P0 (Fragment);Large ribosomal subunit protein uL10	A8K4Z4	1	AGAIAPCEVTVPA	Carbamidomethyl (C)	C	119	RAGAIAPCEVTVPAQ	1	1	1	1	1	1	16889.2	17882.2	13694.1	12473.6	6971.66	3252.33	0.0441036	2.13528	1.09442	0.14949	Up
A8K7T4_C202_M1	A0A384NPY7;A8K7T4;B4DWN1;Q12907	LMAN2;;;LMAN2	Epididymis secretory sperm binding protein;cDNA FLJ75774, highly similar to Homo sapiens lectin, mannose-binding 2 (LMAN2), mRNA;cDNA FLJ52285, highly similar to Vesicular integral-membrane protein VIP36;Vesicular integral-membrane protein VIP36	A8K7T4	1	WTELAGCTADFRN	Carbamidomethyl (C)	C	202	RWTELAGCTADFRNR	1	1	1	1	1	1	23732.2	30222.2	37737.6	19992.1	17761.2	19430.4	0.0485933	1.60347	0.681193	0.156149	Up
A8K878_C120_M1	A8K878;P55145	;MANF	cDNA FLJ77177, highly similar to Homo sapiens arginine-rich, mutated in early stage tumors (ARMET), mRNA;Mesencephalic astrocyte-derived neurotrophic factor	A8K878	1	KKDSQICELKYDK	Carbamidomethyl (C)	C	120	KKKDSQICELKYDKQ	1	1	1	1	1	1	585342	563515	527355	197340	150706	122487	0.000129525	3.56237	1.83284	0.00867311	Up
A8K8D9_C232_M1	A0A384NL00;A8K8D9;P11413	;;G6PD	Glucose-6-phosphate 1-dehydrogenase	A8K8D9	1	NRDNIACVILTFK	Carbamidomethyl (C)	C	232	WNRDNIACVILTFKE				1	1		25768.5	33599.7	34862.3	10017.6	15629.2	9665.2	0.00464651	2.66851	1.41603	0.0414069	Up
A8K916_C391_M1	A0A140VJE8;A8K0G3;A8K916;P63010	AP2B1;;;AP2B1	AP complex subunit beta;AP complex subunit beta;AP complex subunit beta;AP-2 complex subunit beta	A8K916	1	EQSAERCVSTLLD	Carbamidomethyl (C)	C	391	VEQSAERCVSTLLDL	1	1	1	1			5567.01	6930.88	6434.56	1869.95	1979.61	1742.98	0.00038865	3.38531	1.75929	0.0115412	Up
A8K9B9_C141_M1	A8K9B9;Q9H223	;EHD4	cDNA FLJ77391, highly similar to Homo sapiens EH-domain containing 4 (EHD4), mRNA;EH domain-containing protein 4	A8K9B9	1	FLNRFMCSQLPNQ	Carbamidomethyl (C)	C	141	AFLNRFMCSQLPNQV	1	1	1				28544.9	32999.9	53955.9	15807.1	16978.7	9088.64	0.0403766	2.75826	1.46376	0.142004	Up
A8KA84_C850_M1	A0A7P0T9W6;A0A7P0Z4D0;A8KA84;Q9Y6K5	OAS3;OAS3;;OAS3	2'-5' oligoadenylate synthase;2'-5' oligoadenylate synthase;2'-5' oligoadenylate synthase;2'-5'-oligoadenylate synthase 3	A8KA84	1	RAQLEACQQERQF	Carbamidomethyl (C)	C	850	IRAQLEACQQERQFE	1	1	1			1	41380.9	42600	37411.7	30648.9	13736.6	9163.52	0.0281602	2.26694	1.18075	0.113666	Up
A8MXP9_C854_M1	A0A0R4J2E8;A8MXP9;P43243	MATR3	Matrin-3;Matrin 3;Matrin-3	A8MXP9	1	GFYCKLCSLFYTN	Carbamidomethyl (C)	C	854	TGFYCKLCSLFYTNE	1	1	1	1	1	1	98487.3	116775	133091	41879.3	22271.5	19080.4	0.00197311	4.18537	2.06535	0.0250209	Up
B0YIW5_C441_M1	B0YIW5;B0YIW6;P48444;Q6MZV5	ARCN1;ARCN1;ARCN1;DKFZp686M09245	Coatomer subunit delta	B0YIW5	1	RNTLEWCLPVIDA	Carbamidomethyl (C)	C	441	RRNTLEWCLPVIDAK	1	1	1	1			15291.6	25070.6	26249.3	5915.2	3694.96	2389.61	0.00735534	5.55107	2.47276	0.0564986	Up
B0YIW6_C482_M1	B0YIW5;B0YIW6;P48444;Q6MZV5	ARCN1;ARCN1;ARCN1;DKFZp686M09245	Coatomer subunit delta	B0YIW6	1	RNTLEWCLPVIDA	Carbamidomethyl (C)	C	482	RRNTLEWCLPVIDAK	1	1	1	1			15291.6	25070.6	26249.3	5915.2	3694.96	2389.61	0.00735534	5.55107	2.47276	0.0564986	Up
B2R491_C181_M1	B2R491;P62701;Q96IR1	RPS4X	40S ribosomal protein S4;Small ribosomal subunit protein eS4, X isoform;RPS4X protein (Fragment)	B2R491	1	FDTGNLCMVTGGA	Carbamidomethyl (C)	C	181	KFDTGNLCMVTGGAN	1	1	1	1	1	1	17436.6	19071.4	22778.6	8702.85	5086.69	12546.1	0.0147108	2.25119	1.17069	0.0775269	Up
B2R657_C327_M1	B2R657;B2R7L2;B4DHY4;B4DT77;B4DWU2;P20073;Q53HM8	;;;;;ANXA7;	Annexin;Annexin;Annexin;Annexin;Annexin;Annexin A7;Annexin (Fragment)	B2R657	1	RLLVSMCQGNRDE	Carbamidomethyl (C)	C	327	ERLLVSMCQGNRDEN	1	1	1				74976.4	82957	78230.6	33107.8	27709.9	19781.7	0.0003268	2.9301	1.55095	0.0115412	Up
B2R7L2_C305_M1	B2R657;B2R7L2;B4DHY4;B4DT77;B4DWU2;P20073;Q53HM8	;;;;;ANXA7;	Annexin;Annexin;Annexin;Annexin;Annexin;Annexin A7;Annexin (Fragment)	B2R7L2	1	RLLVSMCQGNRDE	Carbamidomethyl (C)	C	305	ERLLVSMCQGNRDEN	1	1	1				74976.4	82957	78230.6	33107.8	27709.9	19781.7	0.0003268	2.9301	1.55095	0.0115412	Up
B2R7V4_C342_M1	B2R7V4;O43172;Q59EL4;Q5T1M7;Q6IAP9	;PRPF4;;PRPF4;PRPF4	cDNA, FLJ93619, highly similar to Homo sapiens PRP4 pre-mRNA processing factor 4 homolog (yeast) (PRPF4), mRNA;U4/U6 small nuclear ribonucleoprotein Prp4;PRPF4 protein variant (Fragment);60 kDa U4/U6 snRNP-specific spliceosomal protein;PRPF4 protein	B2R7V4	1	RFLGTTCYDRSWR	Carbamidomethyl (C)	C	342	GRFLGTTCYDRSWRL	1	1	1	1	1	1	24759.4	18464	19215.5	7319.99	11483.5	15212.9	0.0350415	1.83556	0.876216	0.128674	Up
B2R983_C192_M1	B2R983;P78417;V9HWG9	;GSTO1;HEL-S-21	Glutathione S-transferase omega;Glutathione S-transferase omega-1;Glutathione S-transferase omega	B2R983	1	AMKLNECVDHTPK	Carbamidomethyl (C)	C	192	EAMKLNECVDHTPKL	1	1	1	1	1		12598.7	14099.4	11815.8	5047.35	3546.44	3209.31	0.000528602	3.26303	1.70621	0.0126236	Up
B2RBE5_C238_M1	B2RBE5;Q9BXJ9	;NAA15	cDNA, FLJ95468, highly similar to Homo sapiens transcriptional coactivator tubedown-100 (TBDN100),transcript variant 1, mRNA;N-alpha-acetyltransferase 15, NatA auxiliary subunit	B2RBE5	1	ELLLQLCRLEDAA	Carbamidomethyl (C)	C	238	GELLLQLCRLEDAAD	1	1	1	1	1	1	458663	542944	500733	194723	251117	233285	0.000741035	2.21217	1.14546	0.0145439	Up
B2RBW5_C385_M1	A0A0K0K1H7;A0A7I2V3F1;A0A7I2V3U0;A0A7I2V586;A2A274;B2RBW5;B4DZ08;Q99798	HEL-S-284;ACO2;ACO2;ACO2;ACO2;;;ACO2	Aconitate hydratase, mitochondrial;Aconitate hydratase, mitochondrial;Aconitate hydratase, mitochondrial;Aconitate hydratase, mitochondrial;Aconitase 2;Aconitate hydratase, mitochondrial;Aconitate hydratase, mitochondrial;Aconitate hydratase, mitochondrial	B2RBW5	1	VGLIGSCTNSSYE	Carbamidomethyl (C)	C	385	RVGLIGSCTNSSYED	1	1	1	1		1	7051.84	7923.69	4295.35	3352.39	2008.54	1147.78	0.0284222	2.96078	1.56598	0.113666	Up
B2RDL6_C289_M1	B2RDL6;P09486	;SPARC	SPARC	B2RDL6	1	LDEWAGCFGIKQK	Carbamidomethyl (C)	C	289	ALDEWAGCFGIKQKD				1	1	1	52401.5	29180.5	34191.8	6653.79	7033.32	7059.36	0.0109138	5.58041	2.48037	0.0677918	Up
B2RDY9_C416_M1	B2RDY9;D3DPU2	;CAP1	Adenylyl cyclase-associated protein	B2RDY9	1	INKTDGCHAYLSK	Carbamidomethyl (C)	C	416	SINKTDGCHAYLSKN	1	1	1	1	1		10952.6	13616.7	12223.1	3889.99	4076.01	2483.97	0.000670017	3.52081	1.81591	0.013838	Up
B2RDY9_C427_M1	B2RDY9;D3DPU2	;CAP1	Adenylyl cyclase-associated protein	B2RDY9	1	SKNSLDCEIVSAK	Carbamidomethyl (C)	C	427	LSKNSLDCEIVSAKS	1	1	1	1	1	1	58898	73481.3	90837.6	44771	50462.6	35050.4	0.039304	1.71331	0.776786	0.140108	Up
B2ZZ89_C1389_M1	B2ZZ89;Q01082	SPTBN1	Spectrin beta chain;Spectrin beta chain, non-erythrocytic 1	B2ZZ89	1	ELFTQSCADLDKW	Carbamidomethyl (C)	C	1389	AELFTQSCADLDKWL	1	1	1				21633.5	30284.5	29933.5	17354.6	12957.2	9329.15	0.0183464	2.06482	1.04602	0.0906701	Up
B2ZZ89_C964_M1	B2ZZ89;Q01082	SPTBN1	Spectrin beta chain;Spectrin beta chain, non-erythrocytic 1	B2ZZ89	1	QNYHLECNETKSW	Carbamidomethyl (C)	C	964	IQNYHLECNETKSWI				1		1	17418.3	21627.7	12457.9	4404.52	4431.38	2203.66	0.00802585	4.6654	2.222	0.0595832	Up
B3KME2_C84_M1	B3KME2;O75718;Q8NB01	;CRTAP;	cDNA FLJ10772 fis, clone NT2RP4000243, highly similar to Cartilage-associated protein;Cartilage-associated protein;cDNA FLJ34453 fis, clone HLUNG2002429, highly similar to Homo sapiens cartilage-associated protein	B3KME2	1	RDSEAFCHRNCSA	Carbamidomethyl (C)	C	84	LRDSEAFCHRNCSAA	1	1	1	1		1	9787.63	12552.2	13743.3	5298.3	2383.64	6494.6	0.012491	2.54527	1.34782	0.0734247	Up
B3KN28_C249_M1	A0A494C0G1;A0A8V8TLT8;A0A8V8TMH7;B3KN28;H0Y987;O95394	PGM3;PGM3;PGM3;;PGM3;PGM3	Phosphoacetylglucosamine mutase	B3KN28	1	GKLNHLCGADFVK	Carbamidomethyl (C)	C	249	KGKLNHLCGADFVKS	1		1				82222.8	61053.6	101971	31576.4	21601.3	12022.6	0.0101561	3.76145	1.91129	0.0667536	Up
B3KPS3_C260_M1	B3KPS3;B3KT06;P68363	;;TUBA1B	Tubulin alpha chain;Tubulin alpha chain;Tubulin alpha-1B chain	B3KPS3	1	AEITNACFEPANQ	Carbamidomethyl (C)	C	260	VAEITNACFEPANQM	1	1	1	1			62811.8	62652	57166.7	1407.83	1202.92	2351.64	6.16916e-06	36.8029	5.20175	0.00300967	Up
B3KPS3_C312_M1	B3KPS3;B3KT06;P68363	;;TUBA1B	Tubulin alpha chain;Tubulin alpha chain;Tubulin alpha-1B chain	B3KPS3	1	IQFVDWCPTGFKV	Carbamidomethyl (C)	C	312	SIQFVDWCPTGFKVG	1	1	1	1	1	1	329981	372595	361513	31064.3	38024.5	33661.8	1.57121e-05	10.356	3.3724	0.00376266	Up
B3KQQ0_C271_M1	A0A090N8P3;B3KQQ0;O95302	FKBP9;;FKBP9	peptidylprolyl isomerase;peptidylprolyl isomerase;Peptidyl-prolyl cis-trans isomerase FKBP9	B3KQQ0	1	KVVPENCERISQS	Carbamidomethyl (C)	C	271	NKVVPENCERISQSG	1	1	1	1	1	1	58146.1	64854.3	84951.2	12540.7	44541.4	20924.7	0.0257965	2.66582	1.41458	0.108625	Up
B3KRM2_C251_M1	A0A140VJS0;B3KRM2;P62714;Q5U0I7;Q8WZ56	;;PPP2CB;;	Serine/threonine-protein phosphatase;Serine/threonine-protein phosphatase;Serine/threonine-protein phosphatase 2A catalytic subunit beta isoform;Serine/threonine-protein phosphatase;Serine/threonine-protein phosphatase	B3KRM2	1	MEGYNWCHDRNVV	Carbamidomethyl (C)	C	251	VMEGYNWCHDRNVVT	1	1	1				95190.4	145619	102312	67047.6	59454.7	57947.2	0.0298149	1.86025	0.895496	0.116036	Up
B3KRM2_C266_M1	A0A140VJS0;B3KRM2;P62714;Q5U0I7;Q8WZ56	;;PPP2CB;;	Serine/threonine-protein phosphatase;Serine/threonine-protein phosphatase;Serine/threonine-protein phosphatase 2A catalytic subunit beta isoform;Serine/threonine-protein phosphatase;Serine/threonine-protein phosphatase	B3KRM2	1	FSAPNYCYRCGNQ	Carbamidomethyl (C)	C	266	IFSAPNYCYRCGNQA	1	1	1	1		1	12140.4	13527.7	9617.65	2630.15	3930.29	6876.98	0.0127929	2.62593	1.39283	0.0734247	Up
B3KT06_C260_M1	B3KPS3;B3KT06;P68363	;;TUBA1B	Tubulin alpha chain;Tubulin alpha chain;Tubulin alpha-1B chain	B3KT06	1	AEITNACFEPANQ	Carbamidomethyl (C)	C	260	VAEITNACFEPANQM	1	1	1	1			62811.8	62652	57166.7	1407.83	1202.92	2351.64	6.16916e-06	36.8029	5.20175	0.00300967	Up
B3KT06_C312_M1	B3KPS3;B3KT06;P68363	;;TUBA1B	Tubulin alpha chain;Tubulin alpha chain;Tubulin alpha-1B chain	B3KT06	1	IQFVDWCPTGFKV	Carbamidomethyl (C)	C	312	SIQFVDWCPTGFKVG	1	1	1	1	1	1	329981	372595	361513	31064.3	38024.5	33661.8	1.57121e-05	10.356	3.3724	0.00376266	Up
B3KU62_C251_M1	A0A7I2ST14;B3KU62;Q597H1;Q92597	NDRG1;;TRG14;NDRG1	Protein NDRG1 (Fragment);Protein NDRG1;Protein NDRG1;Protein NDRG1	B3KU62	1	LLKMADCGGLPQI	Carbamidomethyl (C)	C	251	TLLKMADCGGLPQIS	1	1	1		1	1	99595.7	117481	80276.3	48123.1	23060.1	38582.2	0.00856304	2.70898	1.43775	0.0609132	Up
B3KUY2_C44_M1	A0A087WYT3;B3KUY2;Q15185	PTGES3	Prostaglandin E synthase 3	B3KUY2	1	SKLTFSCLGGSDN	Carbamidomethyl (C)	C	44	KSKLTFSCLGGSDNF	1	1	1	1	1	1	92417.3	118457	106467	65535.7	62241.4	51886	0.00587847	1.76631	0.820739	0.0486067	Up
B3KUZ8_C47_M1	B3KUZ8;P00505	;GOT2	Aspartate aminotransferase;Aspartate aminotransferase, mitochondrial	B3KUZ8	1	GGLAEFCKASAEL	Carbamidomethyl (C)	C	47	IGGLAEFCKASAELA	1	1	1	1	1	1	112911	125220	158563	71858	84070.3	62250.1	0.016682	1.81821	0.862519	0.0842297	Up
B3KW79_C320_M1	B3KW79;O75225;Q9H3G5	;CPVL;CPVL	Carboxypeptidase;Carboxypeptidase (Fragment);Probable serine carboxypeptidase CPVL	B3KW79	1	YYNFLRCTEPEDQ	Carbamidomethyl (C)	C	320	NYYNFLRCTEPEDQL	1	1	1	1	1	1	67847.7	90951.1	78352.1	15122.2	35991.3	40366.9	0.00908627	2.59237	1.37427	0.0625597	Up
B3KX11_C150_M1	B3KX11;P49368;Q59H77	;CCT3;	T-complex protein 1 subunit gamma;T-complex protein 1 subunit gamma;T-complex protein 1 subunit gamma (Fragment)	B3KX11	1	RWSSLACNIALDA	Carbamidomethyl (C)	C	150	SRWSSLACNIALDAV	1	1	1	1			80273.2	99653.3	78025.8	21984.6	12287.5	18927	0.000783302	4.84881	2.27763	0.015028	Up
B3KX51_C88_M1	B3KX51;P04899;Q96C71	;GNAI2;GNAI2	Guanine nucleotide-binding protein G(i) subunit alpha-2	B3KX51	1	DHGVQACFGRSRE	Carbamidomethyl (C)	C	88	ADHGVQACFGRSREY	1	1	1	1			6622.69	5222.97	11971.9	965.817	1125.78	1037.04	0.0284986	7.61276	2.92842	0.113666	Up
B3KX72_C519_M1	B3KX72;Q00839	;HNRNPU	cDNA FLJ44920 fis, clone BRAMY3011501, highly similar to Heterogeneous nuclear ribonucleoprotein U;Heterogeneous nuclear ribonucleoprotein U	B3KX72	1	AQRRKMCLFAGFQ	Carbamidomethyl (C)	C	519	AAQRRKMCLFAGFQR	1	1	1	1	1	1	35089.1	44172	39099.6	9131.67	9938.5	5677.49	0.000443112	4.7827	2.25783	0.0118899	Up
B3KX72_C532_M1	B3KX72;Q00839	;HNRNPU	cDNA FLJ44920 fis, clone BRAMY3011501, highly similar to Heterogeneous nuclear ribonucleoprotein U;Heterogeneous nuclear ribonucleoprotein U	B3KX72	1	RKAVVVCPKDEDY	Carbamidomethyl (C)	C	532	QRKAVVVCPKDEDYK	1	1	1	1	1	1	25140.7	28635.6	35684.1	6720.95	12698.2	18971.5	0.0223718	2.33027	1.2205	0.100431	Up
B4DDI9_C150_M1	B4DDI9;P22570;Q6GSK2	;FDXR;FDXR	NADPH:adrenodoxin oxidoreductase, mitochondrial;NADPH:adrenodoxin oxidoreductase, mitochondrial;NADPH:adrenodoxin oxidoreductase, mitochondrial	B4DDI9	1	EELPGVCSARAFV	Carbamidomethyl (C)	C	150	GEELPGVCSARAFVG	1	1	1			1	78693.6	79392.4	67153.8	31221	26307.3	44484.9	0.00363569	2.20794	1.1427	0.036625	Up
B4DE36_C376_M1	A0A2U3TZU2;B4DE36;B4DVJ0;P06744	GPI;;;GPI	Glucose-6-phosphate isomerase	B4DE36	1	GTKMIPCDFLIPV	Carbamidomethyl (C)	C	376	QGTKMIPCDFLIPVQ	1	1	1	1			26659.3	25245	27584.5	13719.7	11537.5	8351.64	0.00084637	2.36512	1.24191	0.0157943	Up
B4DEI4_C126_M1	B4DEI4;Q9H8Y8	;GORASP2	cDNA FLJ54595, highly similar to Golgi reassembly-stacking protein 2;Golgi reassembly-stacking protein 2	B4DEI4	1	NTDTDNCREVIIT	Carbamidomethyl (C)	C	126	YNTDTDNCREVIITP	1	1	1	1	1	1	64669.2	70373.4	53959.2	6122.53	10468.9	6858.88	0.000381718	8.05968	3.01072	0.0115412	Up
B4DFL1_C256_M1	A0A024R713;B4DFL1;P09622	;;DLD	Dihydrolipoyl dehydrogenase;Dihydrolipoyl dehydrogenase;Dihydrolipoyl dehydrogenase, mitochondrial	B4DFL1	1	KAEVITCDVLLVC	Carbamidomethyl (C)	C	256	GKAEVITCDVLLVCI	0.819831		0.8449	0.729606			6603.64	6822	8851.69	1097.3	1153.07	1037.04	0.000906238	6.77654	2.76055	0.0160353	Up
B4DHY4_C273_M1	B2R657;B2R7L2;B4DHY4;B4DT77;B4DWU2;P20073;Q53HM8	;;;;;ANXA7;	Annexin;Annexin;Annexin;Annexin;Annexin;Annexin A7;Annexin (Fragment)	B4DHY4	1	RLLVSMCQGNRDE	Carbamidomethyl (C)	C	273	ERLLVSMCQGNRDEN	1	1	1				74976.4	82957	78230.6	33107.8	27709.9	19781.7	0.0003268	2.9301	1.55095	0.0115412	Up
B4DII5_C354_M1	B4DII5;B4DWX3;O60684	;;KPNA6	Importin subunit alpha;Importin subunit alpha;Importin subunit alpha-7	B4DII5	1	SIRKEACWTISNI	Carbamidomethyl (C)	C	354	ESIRKEACWTISNIT	1	1	1				47595.7	52644.1	38258.1	35029.3	19142.2	24596	0.0338983	1.75831	0.814193	0.125829	Up
B4DJV2_C88_M1	B4DJV2;O75390	CS	Citrate synthase;Citrate synthase, mitochondrial	B4DJV2	1	GFSIPECQKLLPK	Carbamidomethyl (C)	C	88	RGFSIPECQKLLPKA	1	1	1	1	1	1	43783.1	50010.2	40050.3	28677.8	32819.7	27256	0.010938	1.50804	0.592674	0.0677918	Up
B4DJX1_C235_M1	A0A7P0TAG1;A0A7P0TAX2;A0A7P0TBE2;B4DJX1;P10515;Q86YI5	DLAT;DLAT;DLAT;;DLAT;DLAT	Dihydrolipoamide acetyltransferase component of pyruvate dehydrogenase complex;Acetyltransferase component of pyruvate dehydrogenase complex;Acetyltransferase component of pyruvate dehydrogenase complex;Acetyltransferase component of pyruvate dehydrogenase complex;Dihydrolipoyllysine-residue acetyltransferase component of pyruvate dehydrogenase complex, mitochondrial;Acetyltransferase component o…	B4DJX1	1	PLGTPLCIIVEKE	Carbamidomethyl (C)	C	235	VPLGTPLCIIVEKEA	1	1	1	1	1	1	35200.1	86595.8	66023.3	15809.4	8357.01	15350.1	0.0308556	4.75293	2.24882	0.117998	Up
B4DKN9_C16_M1	A0A024R324;B4DKN9;P61586	RHOA;;RHOA	Transforming protein RhoA	B4DKN9	1	IVGDGACGKTCLL	Carbamidomethyl (C)	C	16	VIVGDGACGKTCLLI	1	1	1	1	1	1	53631.8	59345	50817.4	22994.6	24781.6	24314.3	0.000284053	2.27207	1.184	0.0115412	Up
B4DL49_C253_M1	A0A024R374;A0A7I2V440;A0A7I2V668;A8K2H4;B4DL49;E9PHZ5;P07858	;CTSB;CTSB;;;CTSB;CTSB	Cathepsin B	B4DL49	1	LRGQDHCGIESEV	Carbamidomethyl (C)	C	253	ILRGQDHCGIESEVV	1	1	1	1		1	84507	70969.9	69783	1095.78	3304.69	5514.37	0.000125506	22.7195	4.50586	0.00867311	Up
B4DL49_C93_M1	A0A024R374;A0A7I2V440;A0A7I2V668;A8K2H4;B4DL49;E9PHZ5;P07858	;CTSB;CTSB;;;CTSB;CTSB	Cathepsin B	B4DL49	1	REQWPQCPTIKEI	Carbamidomethyl (C)	C	93	AREQWPQCPTIKEIR	1	1	1		1	1	37300.7	38283.4	32572.9	10902.4	14138.8	18606.3	0.00164253	2.47796	1.30916	0.0242347	Up
B4DL66_C33_M1	B4DL66;Q9H832	;UBE2Z	Ubiquitin-conjugating enzyme E2 Z	B4DL66	1	ERTAPQCLLRIKR	Carbamidomethyl (C)	C	33	GERTAPQCLLRIKRD	1	1	1				26080.9	22709.4	29114.2	18496.5	13422.3	12262.7	0.013446	1.76329	0.818266	0.0739422	Up
B4DNE4_C149_M1	A0A023T695;A0A024RA87;A4GYY8;B4DNE4;B4DPQ6;B4DUD6;E7EPK1;E7ES33;G3V1Q4;Q16181;Q3LIE9;Q8TC62	;SEPTIN7;DKFZp686F17268;;;;SEPTIN7;SEPTIN7;SEPTIN7;SEPTIN7;Nbla02942;SEPT7	Septin;Septin;Septin-7 (Fragment);Septin;Septin;Septin;Septin;Septin;Septin;Septin-7;Septin;Septin	B4DNE4	1	TLTPEECQQFKKQ	Carbamidomethyl (C)	C	149	DTLTPEECQQFKKQI	1	1	1	1	1	1	24626.3	17542.8	22432.3	7963.77	6630.75	10331.2	0.00495434	2.59175	1.37393	0.0421922	Up
B4DPQ6_C151_M1	A0A023T695;A0A024RA87;A4GYY8;B4DNE4;B4DPQ6;B4DUD6;E7EPK1;E7ES33;G3V1Q4;Q16181;Q3LIE9;Q8TC62	;SEPTIN7;DKFZp686F17268;;;;SEPTIN7;SEPTIN7;SEPTIN7;SEPTIN7;Nbla02942;SEPT7	Septin;Septin;Septin-7 (Fragment);Septin;Septin;Septin;Septin;Septin;Septin;Septin-7;Septin;Septin	B4DPQ6	1	TLTPEECQQFKKQ	Carbamidomethyl (C)	C	151	DTLTPEECQQFKKQI	1	1	1	1	1	1	24626.3	17542.8	22432.3	7963.77	6630.75	10331.2	0.00495434	2.59175	1.37393	0.0421922	Up
B4DPW9_C116_M1	B4DPW9;P13797;Q53GY0	;PLS3;	Plastin-3;Plastin-3;Plastin-3 (Fragment)	B4DPW9	1	LENDPDCRHVIPM	Carbamidomethyl (C)	C	116	ALENDPDCRHVIPMN	1	1	1	1	1	1	57783.2	52703.4	51986.5	30528.8	25888.9	27880.2	0.000326486	1.92737	0.946632	0.0115412	Up
B4DPW9_C436_M1	B4DPW9;P13797;Q53GY0	;PLS3;	Plastin-3;Plastin-3;Plastin-3 (Fragment)	B4DPW9	1	MKKLENCNYAVEL	Carbamidomethyl (C)	C	436	NMKKLENCNYAVELG	1	1	1	1	1	1	38000.5	44642.7	32950.8	12502.8	10893	6250.04	0.00177584	3.89916	1.96316	0.0244043	Up
B4DT77_C175_M1	B2R657;B2R7L2;B4DHY4;B4DT77;B4DWU2;P20073;Q53HM8	;;;;;ANXA7;	Annexin;Annexin;Annexin;Annexin;Annexin;Annexin A7;Annexin (Fragment)	B4DT77	1	RLLVSMCQGNRDE	Carbamidomethyl (C)	C	175	ERLLVSMCQGNRDEN	1	1	1				74976.4	82957	78230.6	33107.8	27709.9	19781.7	0.0003268	2.9301	1.55095	0.0115412	Up
B4DTN0_C417_M1	A0A3B3IS71;B4DTN0;P06400	RB1;;RB1	RB transcriptional corepressor 1;cDNA FLJ51085, highly similar to Retinoblastoma-associated protein;Retinoblastoma-associated protein	B4DTN0	1	KAVGQGCVEIGSQ	Carbamidomethyl (C)	C	417	AKAVGQGCVEIGSQR	1		1	1			3632.39	3615.63	5088.44	1681.74	2107.01	2648.01	0.0249942	1.91656	0.93852	0.106743	Up
B4DTZ5_C140_M1	A0A7P0T8B3;A0A7P0TAT2;B4DTZ5;P09913;Q8IZ03	IFIT2;IFIT2;;IFIT2;IFIT2	Interferon induced protein with tetratricopeptide repeats 2 (Fragment);Interferon induced protein with tetratricopeptide repeats 2;cDNA FLJ60157, highly similar to Interferon-induced protein with tetratricopeptide repeats 2;Interferon-induced protein with tetratricopeptide repeats 2;Interferon-induced protein with tetratricopeptide repeats 2	B4DTZ5	1	ESPELDCEEGWTR	Carbamidomethyl (C)	C	140	IESPELDCEEGWTRL							86672.2	84766.5	57182.2	29825	23162	36826.6	0.0109342	2.5455	1.34795	0.0677918	Up
B4DUD6_C177_M1	A0A023T695;A0A024RA87;A4GYY8;B4DNE4;B4DPQ6;B4DUD6;E7EPK1;E7ES33;G3V1Q4;Q16181;Q3LIE9;Q8TC62	;SEPTIN7;DKFZp686F17268;;;;SEPTIN7;SEPTIN7;SEPTIN7;SEPTIN7;Nbla02942;SEPT7	Septin;Septin;Septin-7 (Fragment);Septin;Septin;Septin;Septin;Septin;Septin;Septin-7;Septin;Septin	B4DUD6	1	TLTPEECQQFKKQ	Carbamidomethyl (C)	C	177	DTLTPEECQQFKKQI	1	1	1	1	1	1	24626.3	17542.8	22432.3	7963.77	6630.75	10331.2	0.00495434	2.59175	1.37393	0.0421922	Up
B4DUQ1_C121_M1	A0A994J4E9;A0A994J6U9;B4DUQ1	HNRNPK	Heterogeneous nuclear ribonucleoprotein K	B4DUQ1	1	KGSDFDCELRLLI	Carbamidomethyl (C)	C	121	YKGSDFDCELRLLIH	1	1	1	1	1	1	239052	241848	214467	168188	143688	147909	0.00242573	1.51237	0.596814	0.0285651	Up
B4DUT7_C472_M1	A0A140VJK6;B4DUT7;P49915	;;GMPS	GMP synthase (glutamine-hydrolyzing);GMP synthase (glutamine-hydrolyzing);GMP synthase [glutamine-hydrolyzing]	B4DUT7	1	VGVQGDCRSYSYV	Carbamidomethyl (C)	C	472	TVGVQGDCRSYSYVC	1	1	1	1	1	1	7649.74	8770.94	9296.25	6666.79	3164.81	4536.95	0.0285213	1.78981	0.839805	0.113666	Up
B4DVJ0_C377_M1	A0A2U3TZU2;B4DE36;B4DVJ0;P06744	GPI;;;GPI	Glucose-6-phosphate isomerase	B4DVJ0	1	GTKMIPCDFLIPV	Carbamidomethyl (C)	C	377	QGTKMIPCDFLIPVQ	1	1	1	1			26659.3	25245	27584.5	13719.7	11537.5	8351.64	0.00084637	2.36512	1.24191	0.0157943	Up
B4DWN1_C131_M1	A0A384NPY7;A8K7T4;B4DWN1;Q12907	LMAN2;;;LMAN2	Epididymis secretory sperm binding protein;cDNA FLJ75774, highly similar to Homo sapiens lectin, mannose-binding 2 (LMAN2), mRNA;cDNA FLJ52285, highly similar to Vesicular integral-membrane protein VIP36;Vesicular integral-membrane protein VIP36	B4DWN1	1	WTELAGCTADFRN	Carbamidomethyl (C)	C	131	RWTELAGCTADFRNR	1	1	1	1	1	1	23732.2	30222.2	37737.6	19992.1	17761.2	19430.4	0.0485933	1.60347	0.681193	0.156149	Up
B4DWU2_C232_M1	B2R657;B2R7L2;B4DHY4;B4DT77;B4DWU2;P20073;Q53HM8	;;;;;ANXA7;	Annexin;Annexin;Annexin;Annexin;Annexin;Annexin A7;Annexin (Fragment)	B4DWU2	1	RLLVSMCQGNRDE	Carbamidomethyl (C)	C	232	ERLLVSMCQGNRDEN	1	1	1				74976.4	82957	78230.6	33107.8	27709.9	19781.7	0.0003268	2.9301	1.55095	0.0115412	Up
B4DWX3_C362_M1	B4DII5;B4DWX3;O60684	;;KPNA6	Importin subunit alpha;Importin subunit alpha;Importin subunit alpha-7	B4DWX3	1	SIRKEACWTISNI	Carbamidomethyl (C)	C	362	ESIRKEACWTISNIT	1	1	1				47595.7	52644.1	38258.1	35029.3	19142.2	24596	0.0338983	1.75831	0.814193	0.125829	Up
B4DZ08_C366_M1	A0A0K0K1H7;A0A7I2V3F1;A0A7I2V3U0;A0A7I2V586;A2A274;B2RBW5;B4DZ08;Q99798	HEL-S-284;ACO2;ACO2;ACO2;ACO2;;;ACO2	Aconitate hydratase, mitochondrial;Aconitate hydratase, mitochondrial;Aconitate hydratase, mitochondrial;Aconitate hydratase, mitochondrial;Aconitase 2;Aconitate hydratase, mitochondrial;Aconitate hydratase, mitochondrial;Aconitate hydratase, mitochondrial	B4DZ08	1	VGLIGSCTNSSYE	Carbamidomethyl (C)	C	366	RVGLIGSCTNSSYED	1	1	1	1		1	7051.84	7923.69	4295.35	3352.39	2008.54	1147.78	0.0284222	2.96078	1.56598	0.113666	Up
B5BTY4_C223_M1	A0A0D9SF53;A0A0D9SFB3;A0A0D9SG12;A0A2R8Y4A4;A0A2R8Y5G6;A0A2R8Y645;A0A2R8Y774;A0A2R8YCW1;A0A2R8YF78;A0A2R8YFR4;A0A2R8YFS5;A0A2U3TZJ9;B5BTY4;O00571;Q59GX6	DDX3X;DDX3X;DDX3X;DDX3X;DDX3X;DDX3X;DDX3X;DDX3X;DDX3X;DDX3X;DDX3X;DDX3X;DDX3X;DDX3X;	RNA helicase;RNA helicase;RNA helicase;RNA helicase;RNA helicase;RNA helicase;RNA helicase;RNA helicase;RNA helicase;RNA helicase;RNA helicase;RNA helicase;RNA helicase;ATP-dependent RNA helicase DDX3X;RNA helicase (Fragment)	B5BTY4	1	KRDLMACAQTGSG	Carbamidomethyl (C)	C	223	EKRDLMACAQTGSGK	1	1	1	1	1	1	468652	391040	499114	143476	171578	212358	0.00185706	2.57637	1.36534	0.0244043	Up
B5BUB1_C206_M1	A0A384MTR5;B5BUB1;Q9Y265	;RUVBL1;RUVBL1	RuvB-like helicase;RuvB-like helicase (Fragment);RuvB-like 1	B5BUB1	1	VKRQGRCDTYATE	Carbamidomethyl (C)	C	206	AVKRQGRCDTYATEF				1	1	1	12594.8	18285.3	16182.5	6001.39	7971.64	3762.28	0.00898079	2.65361	1.40795	0.0625597	Up
B5MCX3_C71_M1	A0A384N6H6;B5MCX3;Q15019	;SEPTIN2;SEPTIN2	Septin;Septin-2;Septin-2	B5MCX3	1	YGDAINCRDCFKT	Carbamidomethyl (C)	C	71	GYGDAINCRDCFKTI	1	1	1	1	1	1	149133	171130	145050	15366.6	64826.3	78515.6	0.00799259	2.93187	1.55182	0.0595832	Up
B7Z2A1_C260_M1	A0A7P0Z4B9;B7Z2A1;F5GY55;Q16531	DDB1;;DDB1;DDB1	DNA damage-binding protein 1	B7Z2A1	1	KQSTIVCHNRVDP	Carbamidomethyl (C)	C	260	IKQSTIVCHNRVDPH	1	1	1	1	1		5501.54	4772.14	7153.32	3308.66	3999.28	3895.15	0.0479681	1.55555	0.637429	0.154977	Up
B7Z4V2_C594_M1	A0A384P5G6;B7Z4V2;P38646;V9HW84	;;HSPA9;HEL-S-124m	Stress-70 protein, mitochondrial;Stress-70 protein, mitochondrial;Stress-70 protein, mitochondrial;Stress-70 protein, mitochondrial	B7Z4V2	1	QLPADECNKLKEE	Carbamidomethyl (C)	C	594	DQLPADECNKLKEEI	1	1	1	1	1	1	18606.3	24161.5	23903.5	13597.8	13867.7	15778.6	0.0156873	1.54174	0.624562	0.0812928	Up
B7Z556_C132_M1	B7Z556;B7Z8Q2;P02765	;;AHSG	Alpha-2-HS-glycoprotein	B7Z556	1	SVVYAKCDSSPDS	Carbamidomethyl (C)	C	132	FSVVYAKCDSSPDSA	1	1	1	1	1	1	18630.7	13015.5	20863.6	3148.49	7780.61	3529.7	0.0101492	3.63169	1.86064	0.0667536	Up
B7Z5W1_C54_M1	A0A087WY82;B7Z5W1;Q6FIB4;Q9Y5B2;Q9Y624	F11R;;F11R;;F11R	Junctional adhesion molecule A	B7Z5W1	1	NPVKLSCAYSGFS	Carbamidomethyl (C)	C	54	NNPVKLSCAYSGFSS	1	1	1				196327	172764	242134	6463.43	6644.58	5714.68	0.000633486	32.4728	5.02116	0.013437	Up
B7Z6N2_C316_M1	A0A0A0MS51;A0A0A0MT01;A0A384MEF1;A0A8V8TND7;B7Z6N2;B7Z992;B7Z9A0;P06396	GSN;GSN;;GSN;;;;GSN	Gelsolin	B7Z6N2	1	ALKSEDCFILDHG	Carbamidomethyl (C)	C	316	GALKSEDCFILDHGK	1	1	1	1			19045.3	23749.8	20873	10867.9	6458.65	9634.61	0.00297597	2.36147	1.23969	0.0313966	Up
B7Z7A4_C152_M1	B7Z7A4;O14530	;TXNDC9	Thioredoxin domain-containing protein 9	B7Z7A4	1	EKAPFLCERLHIK	Carbamidomethyl (C)	C	152	VEKAPFLCERLHIKV	1	1	1	1			16346.7	16314.4	9853.74	7601.86	3051.4	3001.51	0.0219779	3.11355	1.63856	0.0998345	Up
B7Z8G2_C178_M1	B7Z8G2;Q13451;Q2TA84;Q53GX4	;FKBP5;FKBP5;	peptidylprolyl isomerase;Peptidyl-prolyl cis-trans isomerase FKBP5;peptidylprolyl isomerase;peptidylprolyl isomerase (Fragment)	B7Z8G2	1	MQREEQCILYLGP	Carbamidomethyl (C)	C	178	KMQREEQCILYLGPR				1			22927	24300.3	30087.9	9156.63	4200.1	3738.66	0.00199569	4.52257	2.17714	0.0250209	Up
B7Z8Q2_C198_M1	B7Z556;B7Z8Q2;P02765	;;AHSG	Alpha-2-HS-glycoprotein	B7Z8Q2	1	SVVYAKCDSSPDS	Carbamidomethyl (C)	C	198	FSVVYAKCDSSPDSA	1	1	1	1	1	1	18630.7	13015.5	20863.6	3148.49	7780.61	3529.7	0.0101492	3.63169	1.86064	0.0667536	Up
B7Z992_C264_M1	A0A0A0MS51;A0A0A0MT01;A0A384MEF1;A0A8V8TND7;B7Z6N2;B7Z992;B7Z9A0;P06396	GSN;GSN;;GSN;;;;GSN	Gelsolin	B7Z992	1	ALKSEDCFILDHG	Carbamidomethyl (C)	C	264	GALKSEDCFILDHGK	1	1	1	1			19045.3	23749.8	20873	10867.9	6458.65	9634.61	0.00297597	2.36147	1.23969	0.0313966	Up
B7Z9A0_C304_M1	A0A0A0MS51;A0A0A0MT01;A0A384MEF1;A0A8V8TND7;B7Z6N2;B7Z992;B7Z9A0;P06396	GSN;GSN;;GSN;;;;GSN	Gelsolin	B7Z9A0	1	ALKSEDCFILDHG	Carbamidomethyl (C)	C	304	GALKSEDCFILDHGK	1	1	1	1			19045.3	23749.8	20873	10867.9	6458.65	9634.61	0.00297597	2.36147	1.23969	0.0313966	Up
B7Z9L0_C394_M1	B7Z9L0;P50991	;CCT4	T-complex protein 1 subunit delta	B7Z9L0	1	SGMESYCVRAFAD	Carbamidomethyl (C)	C	394	LSGMESYCVRAFADA	1	1	1	1	1	1	32690.1	23160	23631.6	11576.1	9056.8	14643.7	0.0135417	2.2531	1.17191	0.0740493	Up
B7ZAV4_C458_M1	A0A0A0MTI1;B7ZAV4;Q15392;Q3LIE7	DHCR24;;DHCR24;Nbla03646	24-dehydrocholesterol reductase;cDNA, FLJ79318, highly similar to 24-dehydrocholesterol reductase;Delta(24)-sterol reductase;Uncharacterized protein Nbla03646	B7ZAV4	1	LREKLGCQDAFPE	Carbamidomethyl (C)	C	458	KLREKLGCQDAFPEV							85164.6	90689.8	86696.6	44841	31087.2	34587.5	0.000337094	2.37569	1.24835	0.0115412	Up
B7ZB41_C330_M1	B7ZB41;Q6NUK1	;SLC25A24	cDNA, FLJ79405, highly similar to Homo sapiens solute carrier family 25, member 24, transcript variant 1, mRNA;Mitochondrial adenyl nucleotide antiporter SLC25A24	B7ZB41	1	YSGIYDCAKKILK	Carbamidomethyl (C)	C	330	QYSGIYDCAKKILKH	1	1	1	1	1	1	42715.1	37673.6	34784.9	12569.3	11133.6	14184	0.000484174	3.03993	1.60404	0.0121466	Up
B9EGI2_C723_M1	B9EGI2;Q6WCQ1	MPRIP	Myosin phosphatase Rho interacting protein;Myosin phosphatase Rho-interacting protein	B9EGI2	1	YVLQATCERGFAA	Carbamidomethyl (C)	C	723	GYVLQATCERGFAAM	1	1	1				251084	258905	275769	35945.7	101834	91775.6	0.00103904	3.42296	1.77524	0.0180119	Up
C9JA35_C58_M1	A0A024RCT1;A0A0A0MSV9;A0A0G2JH37;A0A0G2JKZ1;A0A1U9X8L5;A0A8V8TP24;A0A8V8TQC5;A2AB90;C9JA35;O15533	;TAPBP;TAPBP;TAPBP;;TAPBP;TAPBP;TAPBP;TAPBP;TAPBP	Tapasin	C9JA35	1	LTPAQNCPRALDG	Carbamidomethyl (C)	C	58	GLTPAQNCPRALDGA	1	1	1	1			68158.1	90622.3	70934.2	8633.48	3121	2934.41	0.000607721	15.6387	3.96705	0.0133036	Up
C9JIF9_C292_M1	C9JIF9;P13798	APEH	Acylamino-acid-releasing enzyme	C9JIF9	1	DLIGGKCELLSDD	Carbamidomethyl (C)	C	292	VDLIGGKCELLSDDS	1	1	1				63020.9	66740	109029	17253.7	24253.1	34807.4	0.0256087	3.12905	1.64572	0.108369	Up
C9JX88_C386_M1	A0A140VK70;C9JX88;P35998	;PSMC2;PSMC2	26S proteasome regulatory subunit 7	C9JX88	1	AEIRSVCTEAGMF	Carbamidomethyl (C)	C	386	GAEIRSVCTEAGMFA	1	1	1				73438.9	91224.2	96877.9	23874.6	12564.8	18794.5	0.000905406	4.73516	2.24341	0.0160353	Up
D0PNI1_C94_M1	D0PNI1;P63104	YWHAZ	14-3-3 protein zeta/delta	D0PNI1	1	TELRDICNDVLSL	Carbamidomethyl (C)	C	94	ETELRDICNDVLSLL	1	1	1	1		1	22449.1	39081.8	28740.2	10389.3	3121	6431.73	0.0113658	4.52668	2.17845	0.0697946	Up
D3DPU2_C416_M1	B2RDY9;D3DPU2	;CAP1	Adenylyl cyclase-associated protein	D3DPU2	1	INKTDGCHAYLSK	Carbamidomethyl (C)	C	416	SINKTDGCHAYLSKN	1	1	1	1	1		10952.6	13616.7	12223.1	3889.99	4076.01	2483.97	0.000670017	3.52081	1.81591	0.013838	Up
D3DPU2_C427_M1	B2RDY9;D3DPU2	;CAP1	Adenylyl cyclase-associated protein	D3DPU2	1	SKNSLDCEIVSAK	Carbamidomethyl (C)	C	427	LSKNSLDCEIVSAKS	1	1	1	1	1	1	58898	73481.3	90837.6	44771	50462.6	35050.4	0.039304	1.71331	0.776786	0.140108	Up
D9HTE9_C269_M1	D9HTE9;P53007;Q6LAP8	SLC25A1;SLC25A1;	Citrate transport protein;Tricarboxylate transport protein, mitochondrial;Citrate transport protein (Fragment)	D9HTE9	1	YRNTWDCGLQILK	Carbamidomethyl (C)	C	269	KYRNTWDCGLQILKK	1	1	1				51466.4	88501.6	80933.1	31137.3	22251.3	23047.6	0.0144451	2.89001	1.53107	0.0770781	Up
E5KBQ3_C156_M1	E5KBQ3;Q12933	TRAF2	TNF receptor-associated factor;TNF receptor-associated factor 2	E5KBQ3	1	RHLEHECPERSLS	Carbamidomethyl (C)	C	156	ERHLEHECPERSLSC	1	1		1			14090.5	10496.1	10536.5	3494.29	3640.7	2446.58	0.00242396	3.6657	1.87409	0.0285651	Up
E5RG17_C113_M1	A0A0D9SGD3;E5RG17;E5RGF2;Q6P1N9	TATDN1	Deoxyribonuclease TATDN1;Deoxyribonuclease TATDN1 (Fragment);Deoxyribonuclease TATDN1;Deoxyribonuclease TATDN1	E5RG17	1	VVAIGECGLDFDR	Carbamidomethyl (C)	C	113	KVVAIGECGLDFDRL	1	1	1				426904	542594	448494	352368	238843	205098	0.0220133	1.7807	0.832447	0.0998345	Up
E5RGF2_C59_M1	A0A0D9SGD3;E5RG17;E5RGF2;Q6P1N9	TATDN1	Deoxyribonuclease TATDN1;Deoxyribonuclease TATDN1 (Fragment);Deoxyribonuclease TATDN1;Deoxyribonuclease TATDN1	E5RGF2	1	VVAIGECGLDFDR	Carbamidomethyl (C)	C	59	KVVAIGECGLDFDRL	1	1	1				426904	542594	448494	352368	238843	205098	0.0220133	1.7807	0.832447	0.0998345	Up
E7EPK1_C204_M1	A0A023T695;A0A024RA87;A4GYY8;B4DNE4;B4DPQ6;B4DUD6;E7EPK1;E7ES33;G3V1Q4;Q16181;Q3LIE9;Q8TC62	;SEPTIN7;DKFZp686F17268;;;;SEPTIN7;SEPTIN7;SEPTIN7;SEPTIN7;Nbla02942;SEPT7	Septin;Septin;Septin-7 (Fragment);Septin;Septin;Septin;Septin;Septin;Septin;Septin-7;Septin;Septin	E7EPK1	1	TLTPEECQQFKKQ	Carbamidomethyl (C)	C	204	DTLTPEECQQFKKQI	1	1	1	1	1	1	24626.3	17542.8	22432.3	7963.77	6630.75	10331.2	0.00495434	2.59175	1.37393	0.0421922	Up
E7ES33_C184_M1	A0A023T695;A0A024RA87;A4GYY8;B4DNE4;B4DPQ6;B4DUD6;E7EPK1;E7ES33;G3V1Q4;Q16181;Q3LIE9;Q8TC62	;SEPTIN7;DKFZp686F17268;;;;SEPTIN7;SEPTIN7;SEPTIN7;SEPTIN7;Nbla02942;SEPT7	Septin;Septin;Septin-7 (Fragment);Septin;Septin;Septin;Septin;Septin;Septin;Septin-7;Septin;Septin	E7ES33	1	TLTPEECQQFKKQ	Carbamidomethyl (C)	C	184	DTLTPEECQQFKKQI	1	1	1	1	1	1	24626.3	17542.8	22432.3	7963.77	6630.75	10331.2	0.00495434	2.59175	1.37393	0.0421922	Up
E9KL35_C138_M1	E9KL35;P63244	;RACK1	Small ribosomal subunit protein RACK1	E9KL35	1	WNTLGVCKYTVQD	Carbamidomethyl (C)	C	138	LWNTLGVCKYTVQDE	1	1	1	1	1	1	51887.5	49541	49841.3	32832.1	36734.7	28564.6	0.00200753	1.5415	0.624337	0.0250209	Up
E9KL35_C249_M1	E9KL35;P63244	;RACK1	Small ribosomal subunit protein RACK1	E9KL35	1	PNRYWLCAATGPS	Carbamidomethyl (C)	C	249	SPNRYWLCAATGPSI	1	1	1	1	1	1	56883.9	74643.3	66715.6	27890.8	34897	54392.6	0.0459176	1.69177	0.758538	0.151946	Up
E9KL44_C322_M1	E9KL44;H0YFD6;P40939	;HADHA;HADHA	enoyl-CoA hydratase;enoyl-CoA hydratase;Trifunctional enzyme subunit alpha, mitochondrial	E9KL44	1	SDAGYLCESQKFG	Carbamidomethyl (C)	C	322	GSDAGYLCESQKFGE	1	1	1	1	1	1	12671	16435.4	20320.3	6303.23	903.941	5136.07	0.0108749	4.00436	2.00157	0.0677918	Up
E9PHI4_C536_M1	A0A146IHP0;A4D2Q0;A7MCZ7;E9PHI4;O94901	SUN1;UNC84A;UNC84A;SUN1;SUN1	SUN domain-containing protein 1;Unc-84 homolog A (C. elegans);UNC84A protein;Sad1 and UNC84 domain containing 1;SUN domain-containing protein 1	E9PHI4	1	RHVKTGCETVDAV	Carbamidomethyl (C)	C	536	WRHVKTGCETVDAVQ	1	1	1		1		108675	156317	193464	59521.6	61916.4	19838.2	0.0196797	3.24511	1.69827	0.0937327	Up
E9PHZ5_C351_M1	A0A024R374;A0A7I2V440;A0A7I2V668;A8K2H4;B4DL49;E9PHZ5;P07858	;CTSB;CTSB;;;CTSB;CTSB	Cathepsin B	E9PHZ5	1	LRGQDHCGIESEV	Carbamidomethyl (C)	C	351	ILRGQDHCGIESEVV	1	1	1	1		1	84507	70969.9	69783	1095.78	3304.69	5514.37	0.000125506	22.7195	4.50586	0.00867311	Up
E9PHZ5_C93_M1	A0A024R374;A0A7I2V440;A0A7I2V668;A8K2H4;B4DL49;E9PHZ5;P07858	;CTSB;CTSB;;;CTSB;CTSB	Cathepsin B	E9PHZ5	1	REQWPQCPTIKEI	Carbamidomethyl (C)	C	93	AREQWPQCPTIKEIR	1	1	1		1	1	37300.7	38283.4	32572.9	10902.4	14138.8	18606.3	0.00164253	2.47796	1.30916	0.0242347	Up
E9PMT1_C109_M1	E9PMT1;P49662	CASP4	Caspase 4 (Fragment);Caspase-4	E9PMT1	1	TDALKLCPHEEFL	Carbamidomethyl (C)	C	109	STDALKLCPHEEFLR	1	1	1			1	6525.48	8601.23	6401.97	4048.13	3739.29	4978.29	0.0221638	1.68645	0.753986	0.100251	Up
E9PMV1_C872_M1	E9PMV1	PLEC	Plectin	E9PMV1	1	VHKGDECQLVGPA	Carbamidomethyl (C)	C	872	TVHKGDECQLVGPAQ	1	1	1		1		9825.87	19421.5	20403.4	4204.19	1722.44	3056.2	0.017105	5.5273	2.46657	0.0855248	Up
F4NBV6_C188_M1	F4NBV6	HLA-B	MHC class I antigen (Fragment)	F4NBV6	1	AYLEGECMEWLRR	Carbamidomethyl (C)	C	188	RAYLEGECMEWLRRY	1	1	1				1.0723e+06	1.21986e+06	1.03648e+06	562358	848034	666110	0.0142711	1.60301	0.680779	0.0766287	Up
F5GY55_C260_M1	A0A7P0Z4B9;B7Z2A1;F5GY55;Q16531	DDB1;;DDB1;DDB1	DNA damage-binding protein 1	F5GY55	1	KQSTIVCHNRVDP	Carbamidomethyl (C)	C	260	IKQSTIVCHNRVDPN	1	1	1	1	1		5501.54	4772.14	7153.32	3308.66	3999.28	3895.15	0.0479681	1.55555	0.637429	0.154977	Up
F6KPG5_C265_M1	F6KPG5;P02768	;ALB	Albumin (Fragment);Albumin	F6KPG5	1	DLAKYICENQDSI	Carbamidomethyl (C)	C	265	ADLAKYICENQDSIS	1	1	1	1	1	1	46986.2	66942.8	59614.8	21178.3	31653.2	4805.96	0.0166231	3.01095	1.59022	0.0842255	Up
F8VPD4_C183_M1	F8VPD4;P27708	CAD	CAD protein;Multifunctional protein CAD	F8VPD4	1	RILALDCGLKYNQ	Carbamidomethyl (C)	C	183	PRILALDCGLKYNQI	1	1	1	1	1		26680.1	33165	26235.2	7366.84	9014.25	3029.89	0.001486	4.43462	2.14881	0.023172	Up
F8VWS0_C119_M1	A8K4Z4;F8VWS0;P05388;Q53HW2;Q6NSF2	;RPLP0;RPLP0;;RPLP0	60S acidic ribosomal protein P0;60S acidic ribosomal protein P0;Large ribosomal subunit protein uL10;60S acidic ribosomal protein P0 (Fragment);Large ribosomal subunit protein uL10	F8VWS0	1	AGAIAPCEVTVPA	Carbamidomethyl (C)	C	119	RAGAIAPCEVTVPAQ	1	1	1	1	1	1	16889.2	17882.2	13694.1	12473.6	6971.66	3252.33	0.0441036	2.13528	1.09442	0.14949	Up
F8W1R7_C2_M1	F8W1R7;G3V1V0;P60660	MYL6	Myosin light chain 6;Myosin light polypeptide 6;Myosin light polypeptide 6	F8W1R7	1	_____MCDFTEDQ	Carbamidomethyl (C)	C	2	______MCDFTEDQT	1	1	1	1	1	1	89484.5	113408	103817	33905.8	67821.6	57560.5	0.0158171	1.92551	0.945239	0.0815944	Up
F8W7C6_C54_M1	F8W7C6	RPL10	Large ribosomal subunit protein uL16	F8W7C6	1	INKMLSCAGADRL	Carbamidomethyl (C)	C	54	RINKMLSCAGADRLQ	1	1	1	1	1	1	13228.6	16156.5	13481.3	5756.29	10595.2	8113.21	0.0218324	1.75217	0.809147	0.0998095	Up
G3V1Q4_C168_M1	A0A023T695;A0A024RA87;A4GYY8;B4DNE4;B4DPQ6;B4DUD6;E7EPK1;E7ES33;G3V1Q4;Q16181;Q3LIE9;Q8TC62	;SEPTIN7;DKFZp686F17268;;;;SEPTIN7;SEPTIN7;SEPTIN7;SEPTIN7;Nbla02942;SEPT7	Septin;Septin;Septin-7 (Fragment);Septin;Septin;Septin;Septin;Septin;Septin;Septin-7;Septin;Septin	G3V1Q4	1	TLTPEECQQFKKQ	Carbamidomethyl (C)	C	168	DTLTPEECQQFKKQI	1	1	1	1	1	1	24626.3	17542.8	22432.3	7963.77	6630.75	10331.2	0.00495434	2.59175	1.37393	0.0421922	Up
G3V1V0_C2_M1	F8W1R7;G3V1V0;P60660	MYL6	Myosin light chain 6;Myosin light polypeptide 6;Myosin light polypeptide 6	G3V1V0	1	_____MCDFTEDQ	Carbamidomethyl (C)	C	2	______MCDFTEDQT	1	1	1	1	1	1	89484.5	113408	103817	33905.8	67821.6	57560.5	0.0158171	1.92551	0.945239	0.0815944	Up
G3XAI2_C318_M1	A0A7I2V4J9;G3XAI2;P07942	LAMB1	Laminin subunit beta 1;Laminin subunit beta 1;Laminin subunit beta-1	G3XAI2	1	SEDPFGCKSCACN	Carbamidomethyl (C)	C	318	SSEDPFGCKSCACNP	1	1	1	1	1	1	23519.9	21023.1	26379.2	2907.42	5271.01	9177.35	0.00172969	4.08637	2.03082	0.0244043	Up
G5CJS3_C258_M1	G5CJS3	HLA-A	MHC class I anti (Fragment)	G5CJS3	1	EEQRYTCHMQHEG	Carbamidomethyl (C)	C	258	GEEQRYTCHMQHEGL	1	1	1	1	1	1	54276.4	67966.4	56386.8	24831.8	22892.1	19292.7	0.0012226	2.66546	1.41438	0.019977	Up
G8JLB6_C22_M1	A0A384MEJ3;G8JLB6;P31943	;HNRNPH1;HNRNPH1	Epididymis secretory sperm binding protein;Heterogeneous nuclear ribonucleoprotein H1;Heterogeneous nuclear ribonucleoprotein H	G8JLB6	1	RGLPWSCSADEVQ	Carbamidomethyl (C)	C	22	VRGLPWSCSADEVQR	1	1	1	1	1	1	404034	384176	372748	155061	136540	111924	8.27092e-05	2.87704	1.52459	0.00797536	Up
H0Y987_C249_M1	A0A494C0G1;A0A8V8TLT8;A0A8V8TMH7;B3KN28;H0Y987;O95394	PGM3;PGM3;PGM3;;PGM3;PGM3	Phosphoacetylglucosamine mutase	H0Y987	1	GKLNHLCGADFVK	Carbamidomethyl (C)	C	249	KGKLNHLCGADFVKS	1		1				82222.8	61053.6	101971	31576.4	21601.3	12022.6	0.0101561	3.76145	1.91129	0.0667536	Up
H0YFD6_C322_M1	E9KL44;H0YFD6;P40939	;HADHA;HADHA	enoyl-CoA hydratase;enoyl-CoA hydratase;Trifunctional enzyme subunit alpha, mitochondrial	H0YFD6	1	SDAGYLCESQKFG	Carbamidomethyl (C)	C	322	GSDAGYLCESQKFGE	1	1	1	1	1	1	12671	16435.4	20320.3	6303.23	903.941	5136.07	0.0108749	4.00436	2.00157	0.0677918	Up
H3BRG4_C192_M1	H3BRG4;P22695	UQCRC2	Ubiquinol-cytochrome c reductase core protein 2;Cytochrome b-c1 complex subunit 2, mitochondrial	H3BRG4	1	LANPLYCPDYRIG	Carbamidomethyl (C)	C	192	ALANPLYCPDYRIGK	1	1	1	1	1	1	84773.8	107988	84666.8	69084	43693.1	62057.9	0.0343319	1.5868	0.666124	0.126887	Up
H9ZYJ2_C73_M1	H9ZYJ2;P10599	TXN	Thioredoxin	H9ZYJ2	1	SECEVKCMPTFQF	Carbamidomethyl (C)	C	73	ASECEVKCMPTFQFF	1	1	1	1	1	1	13388.4	18582.4	16671.4	8528.13	9833.6	7585.21	0.0101645	1.87468	0.906644	0.0667536	Up
I4AY87_C81_M1	I4AY87;P14174	MIF	Macrophage migration inhibitory factor (Fragment);Macrophage migration inhibitory factor	I4AY87	1	SYSKLLCGLLAER	Carbamidomethyl (C)	C	81	RSYSKLLCGLLAERL	1	1	1	1	1	1	216848	221940	218135	61253.3	64716.5	49931.9	4.4752e-06	3.7346	1.90095	0.00300967	Up
K7EJJ5_C459_M1	A0A087WVQ6;A0A8V8TQ14;A0A8V8TR47;A0A8V8TRF0;K7EJJ5;Q00610	CLTC	Clathrin heavy chain;Clathrin heavy chain;Clathrin heavy chain;Clathrin heavy chain;Clathrin heavy chain;Clathrin heavy chain 1	K7EJJ5	1	KEDKLECSEELGD	Carbamidomethyl (C)	C	459	LKEDKLECSEELGDL	1	1	1	1	1		97935.6	142646	117894	75123.2	68414.4	56725.6	0.0196751	1.79002	0.839979	0.0937327	Up
K7EJJ5_C870_M1	A0A087WVQ6;A0A8V8TQ14;A0A8V8TR47;A0A8V8TRF0;K7EJJ5;Q00610	CLTC	Clathrin heavy chain;Clathrin heavy chain;Clathrin heavy chain;Clathrin heavy chain;Clathrin heavy chain;Clathrin heavy chain 1	K7EJJ5	1	ARIHEGCEEPATH	Carbamidomethyl (C)	C	870	EARIHEGCEEPATHN	1	1	1	1		1	7323.48	8873.33	8510.14	2303.32	3865.01	898.935	0.00382685	3.49597	1.80569	0.0370233	Up
M9PAD3_C100_M1	M9PAD3	HLA-C	MHC class I antigen (Fragment)	M9PAD3	1	LQRMYGCEMGPDG	Carbamidomethyl (C)	C	100	TLQRMYGCEMGPDGR	1	1	1	1	1	1	101858	97266.6	93689.4	29414.4	29326.7	30297.1	9.03455e-06	3.28863	1.71749	0.00353553	Up
N0E4C7_C109_M1	N0E4C7;P67870;Q5SRQ3;Q5SRQ6	CSNK2B	Casein kinase II subunit beta	N0E4C7	1	QGDFGYCPRVYCE	Carbamidomethyl (C)	C	109	QQGDFGYCPRVYCEN	1	1	1	1	1	1	28082.8	29888.2	30449.6	10104.3	20570.5	22959.7	0.0445457	1.64858	0.721221	0.149764	Up
O00116_C565_M1	O00116	AGPS	Alkyldihydroxyacetonephosphate synthase, peroxisomal	O00116	1	FAPFSTCRVTQTY	Carbamidomethyl (C)	C	565	QFAPFSTCRVTQTYD	1	1	1	1			27751.1	18298.8	18261.1	6198.44	4447.77	2934.41	0.00682807	4.7355	2.24352	0.0544325	Up
O00232_C255_M1	A0A0S2Z489;O00232	PSMD12	Proteasome (Prosome, macropain) 26S subunit, non-ATPase, 12, isoform CRA_a (Fragment);26S proteasome non-ATPase regulatory subunit 12	O00232	1	AIYDTPCIQAESE	Carbamidomethyl (C)	C	255	RAIYDTPCIQAESEK	1	1	1	1	1	1	16380.6	27279.1	25622.8	8658.22	12535.8	14829.4	0.0446683	1.92327	0.94356	0.149845	Up
O00299_C223_M1	O00299;Q53FB0;Q5SRT3	CLIC1;;CLIC1	Chloride intracellular channel protein 1;Chloride intracellular channel protein (Fragment);Chloride intracellular channel protein	O00299	1	EEFASTCPDDEEI	Carbamidomethyl (C)	C	223	REEFASTCPDDEEIE	1	1	1	1	1		21343.1	30878.6	27224.1	16855.8	6040.94	16666.9	0.0425141	2.00805	1.00579	0.147098	Up
O00299_C24_M1	O00299;Q53FB0;Q5SRT3	CLIC1;;CLIC1	Chloride intracellular channel protein 1;Chloride intracellular channel protein (Fragment);Chloride intracellular channel protein	O00299	1	GAKIGNCPFSQRL	Carbamidomethyl (C)	C	24	DGAKIGNCPFSQRLF	1	1	1	1	1	1	92813.2	85741.6	82645.8	30725	12908.3	15349.9	0.000442218	4.42839	2.14678	0.0118899	Up
O00410_C733_M1	O00410	IPO5	Importin-5	O00410	1	MPLLLECARVRGP	Carbamidomethyl (C)	C	733	SMPLLLECARVRGPE	1	1	1		1	1	31140.4	29288.8	23000.4	13093.3	9996.06	9887.26	0.00328416	2.52996	1.33912	0.0340894	Up
O00483_C44_M1	O00483	NDUFA4	Cytochrome c oxidase subunit NDUFA4	O00483	1	LFNPDVCWDRNNP	Carbamidomethyl (C)	C	44	ALFNPDVCWDRNNPE	1	1	1	1	1		404614	493211	488862	145107	131846	20938.3	0.00174503	4.65502	2.21879	0.0244043	Up
O00571_C223_M1	A0A0D9SF53;A0A0D9SFB3;A0A0D9SG12;A0A2R8Y4A4;A0A2R8Y5G6;A0A2R8Y645;A0A2R8Y774;A0A2R8YCW1;A0A2R8YF78;A0A2R8YFR4;A0A2R8YFS5;A0A2U3TZJ9;B5BTY4;O00571;Q59GX6	DDX3X;DDX3X;DDX3X;DDX3X;DDX3X;DDX3X;DDX3X;DDX3X;DDX3X;DDX3X;DDX3X;DDX3X;DDX3X;DDX3X;	RNA helicase;RNA helicase;RNA helicase;RNA helicase;RNA helicase;RNA helicase;RNA helicase;RNA helicase;RNA helicase;RNA helicase;RNA helicase;RNA helicase;RNA helicase;ATP-dependent RNA helicase DDX3X;RNA helicase (Fragment)	O00571	1	KRDLMACAQTGSG	Carbamidomethyl (C)	C	223	EKRDLMACAQTGSGK	1	1	1	1	1	1	468652	391040	499114	143476	171578	212358	0.00185706	2.57637	1.36534	0.0244043	Up
O14530_C135_M1	B7Z7A4;O14530	;TXNDC9	Thioredoxin domain-containing protein 9	O14530	1	EKAPFLCERLHIK	Carbamidomethyl (C)	C	135	VEKAPFLCERLHIKV	1	1	1	1			16346.7	16314.4	9853.74	7601.86	3051.4	3001.51	0.0219779	3.11355	1.63856	0.0998345	Up
O14879_C39_M1	A0A7P0T855;O14879;Q5T765	IFIT3	Interferon induced protein with tetratricopeptide repeats 3;Interferon-induced protein with tetratricopeptide repeats 3;Interferon-induced protein with tetratricopeptide repeats 3, isoform CRA_a	O14879	1	DLEDRVCNQIEFL	Carbamidomethyl (C)	C	39	RDLEDRVCNQIEFLN			1				41149.8	28101.9	40397.1	26736.7	20804.8	13468.9	0.0469144	1.79722	0.845765	0.153903	Up
O14980_C164_M1	O14980	XPO1	Exportin-1	O14980	1	RTSESLCQNNMVI	Carbamidomethyl (C)	C	164	SRTSESLCQNNMVIL	1	1	1	1			19824.6	30498.6	21478.2	11820.5	5702.05	3309.04	0.015221	3.44676	1.78524	0.0794798	Up
O15533_C115_M1	A0A024RCT1;A0A0A0MSV9;A0A0G2JH37;A0A0G2JKZ1;A0A1U9X8L5;A0A8V8TP24;A0A8V8TQC5;A2AB90;C9JA35;O15533	;TAPBP;TAPBP;TAPBP;;TAPBP;TAPBP;TAPBP;TAPBP;TAPBP	Tapasin	O15533	1	LTPAQNCPRALDG	Carbamidomethyl (C)	C	115	GLTPAQNCPRALDGA	1	1	1	1			68158.1	90622.3	70934.2	8633.48	3121	2934.41	0.000607721	15.6387	3.96705	0.0133036	Up
O43172_C342_M1	B2R7V4;O43172;Q59EL4;Q5T1M7;Q6IAP9	;PRPF4;;PRPF4;PRPF4	cDNA, FLJ93619, highly similar to Homo sapiens PRP4 pre-mRNA processing factor 4 homolog (yeast) (PRPF4), mRNA;U4/U6 small nuclear ribonucleoprotein Prp4;PRPF4 protein variant (Fragment);60 kDa U4/U6 snRNP-specific spliceosomal protein;PRPF4 protein	O43172	1	RFLGTTCYDRSWR	Carbamidomethyl (C)	C	342	GRFLGTTCYDRSWRL	1	1	1	1	1	1	24759.4	18464	19215.5	7319.99	11483.5	15212.9	0.0350415	1.83556	0.876216	0.128674	Up
O43175_C295_M1	A0A286YF22;A0A2C9F2M7;O43175	PHGDH	D-3-phosphoglycerate dehydrogenase	O43175	1	KEAQSRCGEEIAV	Carbamidomethyl (C)	C	295	TKEAQSRCGEEIAVQ	1	1		1	1	1	24315.9	36161.6	15421.7	4802.87	5247.24	842.247	0.0246061	6.96812	2.80077	0.106637	Up
O43390_C292_M1	O43390	HNRNPR	Heterogeneous nuclear ribonucleoprotein R	O43390	1	KKNRGFCFLEYED	Carbamidomethyl (C)	C	292	KKKNRGFCFLEYEDH	1	1	1	1	1	1	25668	25672.3	30626.2	3821.56	14636.9	8773.74	0.00669611	3.00991	1.58972	0.05367	Up
O43390_C99_M1	O43390	HNRNPR	Heterogeneous nuclear ribonucleoprotein R	O43390	1	NKSAFLCGVMKTY	Carbamidomethyl (C)	C	99	QNKSAFLCGVMKTYR	1	1	1	1			237274	281359	232846	64258.4	41110	19933.3	0.000484726	5.99736	2.58433	0.0121466	Up
O43707_C499_M1	A0A0S2Z3G9;O43707	ACTN4	Alpha-actinin-4 (Fragment);Alpha-actinin-4	O43707	1	TRCQKICDQWDAL	Carbamidomethyl (C)	C	499	NTRCQKICDQWDALG	1	1	1	1	1	1	93001.8	103444	91225.4	7572.4	6258.18	17722.8	8.42059e-05	9.11697	3.18855	0.00797536	Up
O43707_C793_M1	A0A0S2Z3G9;O43707	ACTN4	Alpha-actinin-4 (Fragment);Alpha-actinin-4	O43707	1	PEEFKACLISLGY	Carbamidomethyl (C)	C	793	GPEEFKACLISLGYD	1	1	1	1			42858.8	42229.3	51177.2	19755.6	17073.7	13474.2	0.00109728	2.70886	1.43769	0.0187914	Up
O43776_C359_M1	O43776	NARS1	Asparagine--tRNA ligase, cytoplasmic	O43776	1	RLEDLVCDVVDRI	Carbamidomethyl (C)	C	359	NRLEDLVCDVVDRIL	1	1	1	1		1	130715	115334	89054.5	51286.6	14802.1	17736.3	0.0076931	3.99766	1.99915	0.0585121	Up
O60684_C357_M1	B4DII5;B4DWX3;O60684	;;KPNA6	Importin subunit alpha;Importin subunit alpha;Importin subunit alpha-7	O60684	1	SIRKEACWTISNI	Carbamidomethyl (C)	C	357	ESIRKEACWTISNIT	1	1	1				47595.7	52644.1	38258.1	35029.3	19142.2	24596	0.0338983	1.75831	0.814193	0.125829	Up
O75225_C139_M1	B3KW79;O75225;Q9H3G5	;CPVL;CPVL	Carboxypeptidase;Carboxypeptidase (Fragment);Probable serine carboxypeptidase CPVL	O75225	1	YYNFLRCTEPEDQ	Carbamidomethyl (C)	C	139	NYYNFLRCTEPEDQL	1	1	1	1	1	1	67847.7	90951.1	78352.1	15122.2	35991.3	40366.9	0.00908627	2.59237	1.37427	0.0625597	Up
O75369_C1081_M1	O75369	FLNB	Filamin-B	O75369	1	LTVEGPCEAKIEC	Carbamidomethyl (C)	C	1081	GLTVEGPCEAKIECS	1	1	1	1	1	1	66374.5	66695.8	66337.9	26694.3	29769	11288.5	0.00154978	2.94322	1.55739	0.023948	Up
O75369_C2501_M1	O75369	FLNB	Filamin-B	O75369	1	RSSTETCYSAIPK	Carbamidomethyl (C)	C	2501	TRSSTETCYSAIPKA	1	1	1	1	1	1	153311	98649.5	177166	53748.9	74434.1	62215.8	0.0295096	2.25383	1.17238	0.116036	Up
O75369_C604_M1	O75369	FLNB	Filamin-B	O75369	1	DQNDGSCDVKYWP	Carbamidomethyl (C)	C	604	NDQNDGSCDVKYWPK	1	1	1	1	1	1	30654.9	48041.4	42666.7	9125.31	12271.4	9591.3	0.00451352	3.91645	1.96955	0.0414069	Up
O75369_C706_M1	O75369	FLNB	Filamin-B	O75369	1	MDGTYACSYTPVK	Carbamidomethyl (C)	C	706	RMDGTYACSYTPVKA	1	1	1	1	1	1	124100	131746	121994	20722.4	27390	38860.4	8.97582e-05	4.34435	2.11914	0.00797536	Up
O75369_C991_M1	O75369	FLNB	Filamin-B	O75369	1	SRKVVPCLVTPVT	Carbamidomethyl (C)	C	991	PSRKVVPCLVTPVTG	1	1	1	1	1	1	68182.1	54801.5	49341.2	22774.3	17152.7	15139.4	0.00294719	3.1294	1.64589	0.0313966	Up
O75390_C101_M1	B4DJV2;O75390	CS	Citrate synthase;Citrate synthase, mitochondrial	O75390	1	GFSIPECQKLLPK	Carbamidomethyl (C)	C	101	RGFSIPECQKLLPKA	1	1	1	1	1	1	43783.1	50010.2	40050.3	28677.8	32819.7	27256	0.010938	1.50804	0.592674	0.0677918	Up
O75643_C1278_M1	O75643	SNRNP200	U5 small nuclear ribonucleoprotein 200 kDa helicase	O75643	1	SDRWLSCETQLPV	Carbamidomethyl (C)	C	1278	VSDRWLSCETQLPVS	1	1	1	1			61982.5	41946.8	63927.3	22667.6	14569.4	10019.3	0.0071636	3.55205	1.82865	0.0561094	Up
O75718_C84_M1	B3KME2;O75718;Q8NB01	;CRTAP;	cDNA FLJ10772 fis, clone NT2RP4000243, highly similar to Cartilage-associated protein;Cartilage-associated protein;cDNA FLJ34453 fis, clone HLUNG2002429, highly similar to Homo sapiens cartilage-associated protein	O75718	1	RDSEAFCHRNCSA	Carbamidomethyl (C)	C	84	LRDSEAFCHRNCSAA	1	1	1	1		1	9787.63	12552.2	13743.3	5298.3	2383.64	6494.6	0.012491	2.54527	1.34782	0.0734247	Up
O94901_C499_M1	A0A146IHP0;A4D2Q0;A7MCZ7;E9PHI4;O94901	SUN1;UNC84A;UNC84A;SUN1;SUN1	SUN domain-containing protein 1;Unc-84 homolog A (C. elegans);UNC84A protein;Sad1 and UNC84 domain containing 1;SUN domain-containing protein 1	O94901	1	RHVKTGCETVDAV	Carbamidomethyl (C)	C	499	WRHVKTGCETVDAVQ	1	1	1		1		108675	156317	193464	59521.6	61916.4	19838.2	0.0196797	3.24511	1.69827	0.0937327	Up
O95302_C271_M1	A0A090N8P3;B3KQQ0;O95302	FKBP9;;FKBP9	peptidylprolyl isomerase;peptidylprolyl isomerase;Peptidyl-prolyl cis-trans isomerase FKBP9	O95302	1	KVVPENCERISQS	Carbamidomethyl (C)	C	271	NKVVPENCERISQSG	1	1	1	1	1	1	58146.1	64854.3	84951.2	12540.7	44541.4	20924.7	0.0257965	2.66582	1.41458	0.108625	Up
O95394_C249_M1	A0A494C0G1;A0A8V8TLT8;A0A8V8TMH7;B3KN28;H0Y987;O95394	PGM3;PGM3;PGM3;;PGM3;PGM3	Phosphoacetylglucosamine mutase	O95394	1	GKLNHLCGADFVK	Carbamidomethyl (C)	C	249	KGKLNHLCGADFVKS	1		1				82222.8	61053.6	101971	31576.4	21601.3	12022.6	0.0101561	3.76145	1.91129	0.0667536	Up
O95782_C941_M1	O95782	AP2A1	AP-2 complex subunit alpha-1	O95782	1	KALQVGCLLRLEP	Carbamidomethyl (C)	C	941	TKALQVGCLLRLEPN	1	1	1		1	1	9543.33	12579.9	11853.7	7957.53	7270.75	6142.36	0.0164839	1.58989	0.668924	0.0839663	Up
P00338_C163_M1	P00338;V9HWB9	LDHA;HEL-S-133P	L-lactate dehydrogenase A chain;L-lactate dehydrogenase	P00338	1	RVIGSGCNLDSAR	Carbamidomethyl (C)	C	163	NRVIGSGCNLDSARF	1	1	1	1	1	1	1.36085e+06	1.31555e+06	1.27196e+06	602258	842610	564551	0.00205776	1.96493	0.974476	0.0250974	Up
P00505_C106_M1	B3KUZ8;P00505	;GOT2	Aspartate aminotransferase;Aspartate aminotransferase, mitochondrial	P00505	1	GGLAEFCKASAEL	Carbamidomethyl (C)	C	106	IGGLAEFCKASAELA	1	1	1	1	1	1	112911	125220	158563	71858	84070.3	62250.1	0.016682	1.81821	0.862519	0.0842297	Up
P00558_C50_M1	P00558;V9HWF4	PGK1;HEL-S-68p	Phosphoglycerate kinase 1;Phosphoglycerate kinase	P00558	1	VPSIKFCLDNGAK	Carbamidomethyl (C)	C	50	AVPSIKFCLDNGAKS	1	1	1	1	1	1	22412.6	24427.9	19801.2	13438.4	16939.9	8033.7	0.0320754	1.73491	0.794864	0.120484	Up
P02765_C132_M1	B7Z556;B7Z8Q2;P02765	;;AHSG	Alpha-2-HS-glycoprotein	P02765	1	SVVYAKCDSSPDS	Carbamidomethyl (C)	C	132	FSVVYAKCDSSPDSA	1	1	1	1	1	1	18630.7	13015.5	20863.6	3148.49	7780.61	3529.7	0.0101492	3.63169	1.86064	0.0667536	Up
P02768_C289_M1	F6KPG5;P02768	;ALB	Albumin (Fragment);Albumin	P02768	1	DLAKYICENQDSI	Carbamidomethyl (C)	C	289	ADLAKYICENQDSIS	1	1	1	1	1	1	46986.2	66942.8	59614.8	21178.3	31653.2	4805.96	0.0166231	3.01095	1.59022	0.0842255	Up
P04181_C150_M1	A0A140VJQ4;P04181	;OAT	Ornithine aminotransferase;Ornithine aminotransferase, mitochondrial	P04181	1	EAGETACKLARKW	Carbamidomethyl (C)	C	150	VEAGETACKLARKWG	1	1	1	1			13222.5	12515.5	13920.3	6101.76	4447.77	2934.41	0.000952483	2.94115	1.55638	0.0166807	Up
P04406_C152_M2	P04406;V9HVZ4	GAPDH;HEL-S-162eP	Glyceraldehyde-3-phosphate dehydrogenase	P04406	2	IISNASCTTNCLA	Carbamidomethyl (C)	C	152	KIISNASCTTNCLAP	1	1	1	1	1	1	1.05482e+06	786386	1.2202e+06	1013.78	1244.48	3460.62	0.00128808	535.316	9.06425	0.0202709	Up
P04406_C156_M2	P04406;V9HVZ4	GAPDH;HEL-S-162eP	Glyceraldehyde-3-phosphate dehydrogenase	P04406	2	ASCTTNCLAPLAK	Carbamidomethyl (C)	C	156	NASCTTNCLAPLAKV	1	1	1	1	1	1	1.05482e+06	786386	1.2202e+06	1013.78	1244.48	3460.62	0.00128808	535.316	9.06425	0.0202709	Up
P04843_C545_M1	P04843;Q53EP4	RPN1;	Dolichyl-diphosphooligosaccharide--protein glycosyltransferase subunit 1;Dolichyl-diphosphooligosaccharide--protein glycosyltransferase subunit 1 (Fragment)	P04843	1	TEGSDLCDRVSEM	Carbamidomethyl (C)	C	545	KTEGSDLCDRVSEMQ	1	1	1	1	1	1	38094.9	35134.3	40673.6	22382.4	5560.67	17414.4	0.0120596	2.51122	1.32839	0.072125	Up
P04899_C140_M1	B3KX51;P04899;Q96C71	;GNAI2;GNAI2	Guanine nucleotide-binding protein G(i) subunit alpha-2	P04899	1	DHGVQACFGRSRE	Carbamidomethyl (C)	C	140	ADHGVQACFGRSREY	1	1	1	1			6622.69	5222.97	11971.9	965.817	1125.78	1037.04	0.0284986	7.61276	2.92842	0.113666	Up
P05023_C428_M1	P05023	ATP1A1	Sodium/potassium-transporting ATPase subunit alpha-1	P05023	1	SRIAGLCNRAVFQ	Carbamidomethyl (C)	C	428	LSRIAGLCNRAVFQA	1	1	1	1	1	1	104598	212817	241769	26912.8	49275	58907.5	0.0298658	4.13917	2.04934	0.116036	Up
P05023_C663_M1	P05023	ATP1A1	Sodium/potassium-transporting ATPase subunit alpha-1	P05023	1	PRDAKACVVHGSD	Carbamidomethyl (C)	C	663	NPRDAKACVVHGSDL	1	1	1	1	1	1	10253.2	14365.9	11896	4611.45	2060.59	5290.49	0.00613627	3.05245	1.60997	0.0501403	Up
P05026_C213_M1	A3KLL5;P05026;Q6LEU2	ATP1B1	Sodium/potassium-transporting ATPase subunit beta;Sodium/potassium-transporting ATPase subunit beta-1;Sodium/potassium-transporting ATPase subunit beta (Fragment)	P05026	1	NVLPVQCTGKRDE	Carbamidomethyl (C)	C	213	PNVLPVQCTGKRDED	1	1	1			1	141571	136270	136491	59063.6	49370	35287.7	0.000223066	2.88289	1.52751	0.0115412	Up
P05141_C257_M1	P05141	SLC25A5	ADP/ATP translocase 2	P05141	1	YTGTLDCWRKIAR	Carbamidomethyl (C)	C	257	MYTGTLDCWRKIARD	1	1	1	1	1	1	11673.2	21384.8	15727.9	3184.25	4720.08	1761.08	0.0114135	5.04747	2.33556	0.0697946	Up
P05388_C119_M1	A8K4Z4;F8VWS0;P05388;Q53HW2;Q6NSF2	;RPLP0;RPLP0;;RPLP0	60S acidic ribosomal protein P0;60S acidic ribosomal protein P0;Large ribosomal subunit protein uL10;60S acidic ribosomal protein P0 (Fragment);Large ribosomal subunit protein uL10	P05388	1	AGAIAPCEVTVPA	Carbamidomethyl (C)	C	119	RAGAIAPCEVTVPAQ	1	1	1	1	1	1	16889.2	17882.2	13694.1	12473.6	6971.66	3252.33	0.0441036	2.13528	1.09442	0.14949	Up
P06396_C331_M1	A0A0A0MS51;A0A0A0MT01;A0A384MEF1;A0A8V8TND7;B7Z6N2;B7Z992;B7Z9A0;P06396	GSN;GSN;;GSN;;;;GSN	Gelsolin	P06396	1	ALKSEDCFILDHG	Carbamidomethyl (C)	C	331	GALKSEDCFILDHGK	1	1	1	1			19045.3	23749.8	20873	10867.9	6458.65	9634.61	0.00297597	2.36147	1.23969	0.0313966	Up
P06400_C438_M1	A0A3B3IS71;B4DTN0;P06400	RB1;;RB1	RB transcriptional corepressor 1;cDNA FLJ51085, highly similar to Retinoblastoma-associated protein;Retinoblastoma-associated protein	P06400	1	KAVGQGCVEIGSQ	Carbamidomethyl (C)	C	438	AKAVGQGCVEIGSQR	1		1	1			3632.39	3615.63	5088.44	1681.74	2107.01	2648.01	0.0249942	1.91656	0.93852	0.106743	Up
P06744_C404_M1	A0A2U3TZU2;B4DE36;B4DVJ0;P06744	GPI;;;GPI	Glucose-6-phosphate isomerase	P06744	1	GTKMIPCDFLIPV	Carbamidomethyl (C)	C	404	QGTKMIPCDFLIPVQ	1	1	1	1			26659.3	25245	27584.5	13719.7	11537.5	8351.64	0.00084637	2.36512	1.24191	0.0157943	Up
P07355_C133_M1	A0A024R5Z7;P07355;V9HW65	ANXA2;ANXA2;HEL-S-270	Annexin;Annexin A2;Annexin	P07355	1	SLIEIICSRTNQE	Carbamidomethyl (C)	C	133	DSLIEIICSRTNQEL	1	1	1	1	1		14448.4	14147.7	17847.3	9956.17	10359.2	9590.57	0.0102788	1.55298	0.635042	0.0668162	Up
P07437_C12_M1	A0A384NYT8;P07437;Q5SU16	;TUBB;TUBB	Tubulin beta chain (Fragment);Tubulin beta chain;Tubulin beta chain	P07437	1	HIQAGQCGNQIGA	Carbamidomethyl (C)	C	12	VHIQAGQCGNQIGAK	1	1	1	1	1	1	85105.3	84736.9	62922.3	3754.42	7349.02	8435.77	0.000680756	11.9127	3.57443	0.013838	Up
P07737_C128_M1	P07737	PFN1	Profilin-1	P07737	1	GLINKKCYEMASH	Carbamidomethyl (C)	C	128	GGLINKKCYEMASHL	1	1	1	1	1	1	261349	351307	348454	87891	111905	91535.8	0.00184237	3.29902	1.72204	0.0244043	Up
P07858_C319_M1	A0A024R374;A0A7I2V440;A0A7I2V668;A8K2H4;B4DL49;E9PHZ5;P07858	;CTSB;CTSB;;;CTSB;CTSB	Cathepsin B	P07858	1	LRGQDHCGIESEV	Carbamidomethyl (C)	C	319	ILRGQDHCGIESEVV	1	1	1	1		1	84507	70969.9	69783	1095.78	3304.69	5514.37	0.000125506	22.7195	4.50586	0.00867311	Up
P07858_C93_M1	A0A024R374;A0A7I2V440;A0A7I2V668;A8K2H4;B4DL49;E9PHZ5;P07858	;CTSB;CTSB;;;CTSB;CTSB	Cathepsin B	P07858	1	REQWPQCPTIKEI	Carbamidomethyl (C)	C	93	AREQWPQCPTIKEIR	1	1	1		1	1	37300.7	38283.4	32572.9	10902.4	14138.8	18606.3	0.00164253	2.47796	1.30916	0.0242347	Up
P07942_C455_M1	A0A7I2V4J9;G3XAI2;P07942	LAMB1	Laminin subunit beta 1;Laminin subunit beta 1;Laminin subunit beta-1	P07942	1	SEDPFGCKSCACN	Carbamidomethyl (C)	C	455	SSEDPFGCKSCACNP	1	1	1	1	1	1	23519.9	21023.1	26379.2	2907.42	5271.01	9177.35	0.00172969	4.08637	2.03082	0.0244043	Up
P08133_C552_M1	A0A0S2Z2Z6;P08133	ANXA6	Annexin (Fragment);Annexin A6	P08133	1	RFMTILCTRSYPH	Carbamidomethyl (C)	C	552	TRFMTILCTRSYPHL				1			19849	21761.6	23643.9	7836.67	4157.26	3391.62	0.000694224	4.24129	2.0845	0.0139457	Up
P08559_C261_M1	P08559;Q5JPU2	PDHA1	Pyruvate dehydrogenase E1 component subunit alpha, somatic form, mitochondrial;Pyruvate dehydrogenase E1 component subunit alpha	P08559	1	DGMDILCVREATR	Carbamidomethyl (C)	C	261	VDGMDILCVREATRF	1	1	1	1	1	1	15710.1	19255.2	15540.5	11238.2	9396.39	5250.04	0.0186867	1.95119	0.964355	0.0920683	Up
P08582_C369_M1	P08582	MELTF	Melanotransferrin	P08582	1	PPYLRWCVLSTPE	Carbamidomethyl (C)	C	369	LPPYLRWCVLSTPEI							61958.2	68219.5	47217	35817.3	26874.6	26580.6	0.0132396	1.98711	0.990674	0.073794	Up
P08670_C328_M1	P08670;V9HWE1	VIM;HEL113	Vimentin	P08670	1	QVQSLTCEVDALK	Carbamidomethyl (C)	C	328	RQVQSLTCEVDALKG	1	1	1	1	1	1	283366	357302	335614	229193	154488	159774	0.0114247	1.79644	0.84514	0.0697946	Up
P09104_C357_M1	P09104;Q6FHV6	ENO2	Gamma-enolase;phosphopyruvate hydratase	P09104	1	TEAIQACKLAQEN	Carbamidomethyl (C)	C	357	VTEAIQACKLAQENG	1	1	1	1	1	1	298737	266402	352462	43568.2	91896.6	55308.4	0.00112411	4.80991	2.26601	0.0187914	Up
P09211_C48_M1	P09211;V9HWE9	GSTP1;HEL-S-22	Glutathione S-transferase P;Glutathione S-transferase	P09211	1	GSLKASCLYGQLP	Carbamidomethyl (C)	C	48	EGSLKASCLYGQLPK	1	1	1	1	1	1	263063	300545	258074	95464.7	104993	104335	0.000233417	2.69587	1.43075	0.0115412	Up
P09486_C289_M1	B2RDL6;P09486	;SPARC	SPARC	P09486	1	LDEWAGCFGIKQK	Carbamidomethyl (C)	C	289	ALDEWAGCFGIKQKD				1	1	1	52401.5	29180.5	34191.8	6653.79	7033.32	7059.36	0.0109138	5.58041	2.48037	0.0677918	Up
P09622_C306_M1	A0A024R713;B4DFL1;P09622	;;DLD	Dihydrolipoyl dehydrogenase;Dihydrolipoyl dehydrogenase;Dihydrolipoyl dehydrogenase, mitochondrial	P09622	1	KAEVITCDVLLVC	Carbamidomethyl (C)	C	306	GKAEVITCDVLLVCI	0.819831		0.8449	0.729606			6603.64	6822	8851.69	1097.3	1153.07	1037.04	0.000906238	6.77654	2.76055	0.0160353	Up
P09913_C140_M1	A0A7P0T8B3;A0A7P0TAT2;B4DTZ5;P09913;Q8IZ03	IFIT2;IFIT2;;IFIT2;IFIT2	Interferon induced protein with tetratricopeptide repeats 2 (Fragment);Interferon induced protein with tetratricopeptide repeats 2;cDNA FLJ60157, highly similar to Interferon-induced protein with tetratricopeptide repeats 2;Interferon-induced protein with tetratricopeptide repeats 2;Interferon-induced protein with tetratricopeptide repeats 2	P09913	1	ESPELDCEEGWTR	Carbamidomethyl (C)	C	140	IESPELDCEEGWTRL							86672.2	84766.5	57182.2	29825	23162	36826.6	0.0109342	2.5455	1.34795	0.0677918	Up
P09936_C152_M1	P09936;V9HW74	UCHL1;HEL-117	Ubiquitin carboxyl-terminal hydrolase isozyme L1;Ubiquitin carboxyl-terminal hydrolase	P09936	1	VAQEGQCRVDDKV	Carbamidomethyl (C)	C	152	AVAQEGQCRVDDKVN	1	1	1	1	1	1	73745.9	75666.9	81996.8	916.227	4216.06	843.992	1.03529e-05	38.7214	5.27506	0.00353553	Up
P0DPH7_C347_M1	P0DPH7;P0DPH8;Q1ZYQ1	TUBA3C;TUBA3D;TUBA2	Tubulin alpha-3C chain;Tubulin alpha-3D chain;Tubulin alpha chain	P0DPH7	1	IQFVDWCPTGFKV	Carbamidomethyl (C)	C	347	TIQFVDWCPTGFKVG	1	1	1	1	1	1	102365	122004	122062	10346.8	11855.4	9942.5	9.10802e-05	10.7773	3.42992	0.00797536	Up
P0DPH8_C347_M1	P0DPH7;P0DPH8;Q1ZYQ1	TUBA3C;TUBA3D;TUBA2	Tubulin alpha-3C chain;Tubulin alpha-3D chain;Tubulin alpha chain	P0DPH8	1	IQFVDWCPTGFKV	Carbamidomethyl (C)	C	347	TIQFVDWCPTGFKVG	1	1	1	1	1	1	102365	122004	122062	10346.8	11855.4	9942.5	9.10802e-05	10.7773	3.42992	0.00797536	Up
P10515_C291_M1	A0A7P0TAG1;A0A7P0TAX2;A0A7P0TBE2;B4DJX1;P10515;Q86YI5	DLAT;DLAT;DLAT;;DLAT;DLAT	Dihydrolipoamide acetyltransferase component of pyruvate dehydrogenase complex;Acetyltransferase component of pyruvate dehydrogenase complex;Acetyltransferase component of pyruvate dehydrogenase complex;Acetyltransferase component of pyruvate dehydrogenase complex;Dihydrolipoyllysine-residue acetyltransferase component of pyruvate dehydrogenase complex, mitochondrial;Acetyltransferase component o…	P10515	1	PLGTPLCIIVEKE	Carbamidomethyl (C)	C	291	VPLGTPLCIIVEKEA	1	1	1	1	1	1	35200.1	86595.8	66023.3	15809.4	8357.01	15350.1	0.0308556	4.75293	2.24882	0.117998	Up
P10599_C73_M1	H9ZYJ2;P10599	TXN	Thioredoxin	P10599	1	SECEVKCMPTFQF	Carbamidomethyl (C)	C	73	ASECEVKCMPTFQFF	1	1	1	1	1	1	13388.4	18582.4	16671.4	8528.13	9833.6	7585.21	0.0101645	1.87468	0.906644	0.0667536	Up
P10620_C50_M1	P10620;Q6LET6	MGST1	Microsomal glutathione S-transferase 1;Microsomal glutathione S-transferase 1 (Fragment)	P10620	1	FANPEDCVAFGKG	Carbamidomethyl (C)	C	50	VFANPEDCVAFGKGE	1	1	1	1	1	1	77781.3	115492	115668	15295.2	16826.3	75748.5	0.0466061	2.86401	1.51804	0.153481	Up
P10809_C237_M1	A0A024R3X4;P10809	HSPD1	60 kDa heat shock protein, mitochondrial (Fragment);60 kDa heat shock protein, mitochondrial	P10809	1	TSKGQKCEFQDAY	Carbamidomethyl (C)	C	237	NTSKGQKCEFQDAYV	1	1	1	1	1	1	62684.5	67905.1	69188	26309.6	25685.3	25111.1	3.50676e-05	2.59095	1.37348	0.00516767	Up
P11047_C351_M1	P11047	LAMC1	Laminin subunit gamma-1	P11047	1	NGRSQECYFDPEL	Carbamidomethyl (C)	C	351	CNGRSQECYFDPELY	1	1	1	1	1	1	26670.1	27534.6	32017.7	13822.8	8900.36	15046.5	0.00297805	2.28285	1.19083	0.0313966	Up
P11177_C263_M1	A0A384MDR8;P11177	;PDHB	Pyruvate dehydrogenase E1 component subunit beta;Pyruvate dehydrogenase E1 component subunit beta, mitochondrial	P11177	1	SKEGVECEVINMR	Carbamidomethyl (C)	C	263	LSKEGVECEVINMRT	1	1	1				346345	391790	361754	34909.6	43157.6	41148.4	1.76289e-05	9.22605	3.20571	0.00376266	Up
P11413_C232_M1	A0A384NL00;A8K8D9;P11413	;;G6PD	Glucose-6-phosphate 1-dehydrogenase	P11413	1	NRDNIACVILTFK	Carbamidomethyl (C)	C	232	WNRDNIACVILTFKE				1	1		25768.5	33599.7	34862.3	10017.6	15629.2	9665.2	0.00464651	2.66851	1.41603	0.0414069	Up
P11717_C1042_M1	P11717	IGF2R	Cation-independent mannose-6-phosphate receptor	P11717	1	FIVRFVCNDDVYS	Carbamidomethyl (C)	C	1042	AFIVRFVCNDDVYSG	1	1	1	1	1	1	31446.2	43508.4	30012.1	17449	13289.8	11604.4	0.010663	2.47895	1.30973	0.0677918	Up
P11717_C134_M1	P11717	IGF2R	Cation-independent mannose-6-phosphate receptor	P11717	1	SSIAFLCGKTLGT	Carbamidomethyl (C)	C	134	QSSIAFLCGKTLGTP	1	1	1				57771.2	69628.9	44209.6	16283	15116.1	13473	0.00462909	3.82441	1.93524	0.0414069	Up
P12004_C162_M1	P12004;Q6FHF5;Q6FI35	PCNA	Proliferating cell nuclear antigen;Proliferating cell nuclear antigen (Fragment);Proliferating cell nuclear antigen	P12004	1	DAVVISCAKDGVK	Carbamidomethyl (C)	C	162	GDAVVISCAKDGVKF	1	1	1	1	1	1	188054	228572	229889	20523.4	7831.4	8686.05	0.000143666	17.4541	4.12549	0.00908556	Up
P13796_C336_M1	P13796;Q53FI1;V9HWJ7	LCP1;;HEL-S-37	Plastin-2;L-plastin variant (Fragment);Epididymis secretory protein Li 37	P13796	1	DIQRAECMLQQAE	Carbamidomethyl (C)	C	336	DDIQRAECMLQQAER	1	1	1	1	1	1	40585.3	31741	35433.5	12871.9	26854.3	13467.3	0.0254946	2.02581	1.0185	0.108154	Up
P13797_C143_M1	B4DPW9;P13797;Q53GY0	;PLS3;	Plastin-3;Plastin-3;Plastin-3 (Fragment)	P13797	1	LENDPDCRHVIPM	Carbamidomethyl (C)	C	143	ALENDPDCRHVIPMN	1	1	1	1	1	1	57783.2	52703.4	51986.5	30528.8	25888.9	27880.2	0.000326486	1.92737	0.946632	0.0115412	Up
P13797_C463_M1	B4DPW9;P13797;Q53GY0	;PLS3;	Plastin-3;Plastin-3;Plastin-3 (Fragment)	P13797	1	MKKLENCNYAVEL	Carbamidomethyl (C)	C	463	NMKKLENCNYAVELG	1	1	1	1	1	1	38000.5	44642.7	32950.8	12502.8	10893	6250.04	0.00177584	3.89916	1.96316	0.0244043	Up
P13798_C292_M1	C9JIF9;P13798	APEH	Acylamino-acid-releasing enzyme	P13798	1	DLIGGKCELLSDD	Carbamidomethyl (C)	C	292	VDLIGGKCELLSDDS	1	1	1				63020.9	66740	109029	17253.7	24253.1	34807.4	0.0256087	3.12905	1.64572	0.108369	Up
P14174_C81_M1	I4AY87;P14174	MIF	Macrophage migration inhibitory factor (Fragment);Macrophage migration inhibitory factor	P14174	1	SYSKLLCGLLAER	Carbamidomethyl (C)	C	81	RSYSKLLCGLLAERL	1	1	1	1	1	1	216848	221940	218135	61253.3	64716.5	49931.9	4.4752e-06	3.7346	1.90095	0.00300967	Up
P14618_C358_M1	P14618;V9HWB8	PKM;HEL-S-30	Pyruvate kinase PKM;Pyruvate kinase	P14618	1	VLDGADCIMLSGE	Carbamidomethyl (C)	C	358	AVLDGADCIMLSGET	1	1	1	1			13832.8	13201.8	12093.8	2139.86	2230.83	2648.01	3.59749e-05	5.57487	2.47894	0.00516767	Up
P14618_C474_M1	P14618;V9HWB8	PKM;HEL-S-30	Pyruvate kinase PKM;Pyruvate kinase	P14618	1	GIFPVLCKDPVQE	Carbamidomethyl (C)	C	474	RGIFPVLCKDPVQEA	1	1	1	1	1	1	139094	144107	154408	41982.7	56621.1	43344.6	0.000109647	3.08287	1.62427	0.00867311	Up
P15924_C482_M1	P15924	DSP	Desmoplakin	P15924	1	VHKGDECILKDNN	Carbamidomethyl (C)	C	482	IVHKGDECILKDNNE	1	1	1	1			39944.9	17608	37259.5	14406.5	3685.56	4295.51	0.0371323	4.23504	2.08238	0.135042	Up
P16615_C364_M1	A0A0S2Z3L2;P16615	ATP2A2	Sarcoplasmic/endoplasmic reticulum calcium ATPase 2 (Fragment);Sarcoplasmic/endoplasmic reticulum calcium ATPase 2	P16615	1	TNQMSVCRMFILD	Carbamidomethyl (C)	C	364	TTNQMSVCRMFILDR	1	1	1	1		1	19668.7	14303.4	21243.5	8002.29	4389.67	5619.35	0.00621176	3.0656	1.61617	0.0505076	Up
P17987_C385_M1	P17987	TCP1	T-complex protein 1 subunit alpha	P17987	1	GANDFMCDEMERS	Carbamidomethyl (C)	C	385	RGANDFMCDEMERSL	1	1	1	1	1	1	79686.3	91035.7	73883.3	22265.4	24225.7	25636.1	0.000361231	3.3913	1.76184	0.0115412	Up
P20073_C327_M1	B2R657;B2R7L2;B4DHY4;B4DT77;B4DWU2;P20073;Q53HM8	;;;;;ANXA7;	Annexin;Annexin;Annexin;Annexin;Annexin;Annexin A7;Annexin (Fragment)	P20073	1	RLLVSMCQGNRDE	Carbamidomethyl (C)	C	327	ERLLVSMCQGNRDEN	1	1	1				74976.4	82957	78230.6	33107.8	27709.9	19781.7	0.0003268	2.9301	1.55095	0.0115412	Up
P20648_C716_M1	A0A384MR29;P20648;Q658V6	;ATP4A;DKFZp666G172	Sodium/potassium-transporting ATPase subunit alpha;Potassium-transporting ATPase alpha chain 1;Sodium/potassium-transporting ATPase subunit alpha (Fragment)	P20648	1	LVIVESCQRLGAI	Carbamidomethyl (C)	C	716	KLVIVESCQRLGAIV	1	1	1	1	1		30718.1	27252.4	27819.7	4518.5	10223.6	4362.78	0.000546398	4.4905	2.16688	0.0127805	Up
P21333_C1157_M1	P21333	FLNA	Filamin-A	P21333	1	KAHVVPCFDASKV	Carbamidomethyl (C)	C	1157	FKAHVVPCFDASKVK	1	1	1	1	1	1	51301.9	43251	39619.7	13045.8	14339.6	5730.39	0.00152468	4.05162	2.0185	0.0236671	Up
P21333_C1410_M1	P21333	FLNA	Filamin-A	P21333	1	DNKDGSCSVEYIP	Carbamidomethyl (C)	C	1410	MDNKDGSCSVEYIPY				1	1	1	21910.4	19649.5	21965.5	6957.97	4795.43	2083.22	0.000495548	4.59111	2.19884	0.0121748	Up
P21333_C53_M1	P21333	FLNA	Filamin-A	P21333	1	NTFTRWCNEHLKC	Carbamidomethyl (C)	C	53	QNTFTRWCNEHLKCV	1	1	1	1	1	1	32240	31718.9	33197.8	19427.2	12476.9	26252.1	0.0313779	1.67061	0.740379	0.119727	Up
P21333_C717_M1	P21333	FLNA	Filamin-A	P21333	1	VQDNEGCPVEALV	Carbamidomethyl (C)	C	717	QVQDNEGCPVEALVK	1	1	1	1	1	1	48187.5	65518	55205.9	9542.12	3427.63	9850.64	0.000867682	7.40178	2.88787	0.0159406	Up
P21399_C118_M1	P21399;V9HWB7	ACO1;HEL60	Cytoplasmic aconitate hydratase	P21399	1	EKINPVCPADLVI	Carbamidomethyl (C)	C	118	PEKINPVCPADLVID				1	1		10543	17554.2	15084.3	5658.99	730.165	6955.88	0.0236216	3.23577	1.69411	0.10382	Up
P21980_C10_M1	P21980;V9HWG3	TGM2;HEL-S-45	Protein-glutamine gamma-glutamyltransferase 2	P21980	1	ELVLERCDLELET	Carbamidomethyl (C)	C	10	EELVLERCDLELETN							34802.3	46387.9	36233.5	11460.3	19787.4	28379.9	0.0341679	1.96928	0.977672	0.126555	Up
P21980_C554_M1	P21980;V9HWG3	TGM2;HEL-S-45	Protein-glutamine gamma-glutamyltransferase 2	P21980	1	YEKYRDCLTESNL	Carbamidomethyl (C)	C	554	LYEKYRDCLTESNLI							68532.8	80736.8	65026.6	36244.9	31315.2	21002.8	0.00305429	2.41971	1.27483	0.0319951	Up
P22102_C298_M1	P22102;Q3B7A7;Q59HH3	GART;GART;	Trifunctional purine biosynthetic protein adenosine-3;Trifunctional purine biosynthetic protein adenosine-3;Trifunctional purine biosynthetic protein adenosine-3 (Fragment)	P22102	1	RFGDPECQVILPL	Carbamidomethyl (C)	C	298	CRFGDPECQVILPLL	1	1	1	1	1	1	9996.44	12643.3	11095.2	2242.5	1689.23	695.023	0.000404192	7.29127	2.86617	0.0116976	Up
P22234_C185_M1	P22234	PAICS	Bifunctional phosphoribosylaminoimidazole carboxylase/phosphoribosylaminoimidazole succinocarboxamide synthetase	P22234	1	SWLPQNCTLVDMK	Carbamidomethyl (C)	C	185	KSWLPQNCTLVDMKI	1	1	1	1			33750.7	29022	11445.8	7880.12	2312.83	3240.68	0.0443742	5.52483	2.46593	0.149764	Up
P22570_C152_M1	B4DDI9;P22570;Q6GSK2	;FDXR;FDXR	NADPH:adrenodoxin oxidoreductase, mitochondrial;NADPH:adrenodoxin oxidoreductase, mitochondrial;NADPH:adrenodoxin oxidoreductase, mitochondrial	P22570	1	EELPGVCSARAFV	Carbamidomethyl (C)	C	152	GEELPGVCSARAFVG	1	1	1			1	78693.6	79392.4	67153.8	31221	26307.3	44484.9	0.00363569	2.20794	1.1427	0.036625	Up
P22695_C192_M1	H3BRG4;P22695	UQCRC2	Ubiquinol-cytochrome c reductase core protein 2;Cytochrome b-c1 complex subunit 2, mitochondrial	P22695	1	LANPLYCPDYRIG	Carbamidomethyl (C)	C	192	ALANPLYCPDYRIGK	1	1	1	1	1	1	84773.8	107988	84666.8	69084	43693.1	62057.9	0.0343319	1.5868	0.666124	0.126887	Up
P23396_C97_M1	P23396	RPS3	Small ribosomal subunit protein uS3	P23396	1	VATRGLCAIAQAE	Carbamidomethyl (C)	C	97	KVATRGLCAIAQAES	1	1	1	1	1	1	78374.9	80680.2	76869.6	46307.7	52975.7	41236.1	0.000882905	1.67895	0.747557	0.0160353	Up
P24752_C196_M1	A0A140VJX1;A0A5F9ZHL1;P24752	;ACAT1;ACAT1	Acetyl-CoA acetyltransferase, mitochondrial;Acetyl-CoA acetyltransferase, mitochondrial;Acetyl-CoA acetyltransferase, mitochondrial	P24752	1	KIHMGSCAENTAK	Carbamidomethyl (C)	C	196	NKIHMGSCAENTAKK	1	1	1	1	1		8149.82	7096.88	9110.63	4870.6	2832.08	2184.32	0.00840104	2.46357	1.30075	0.060912	Up
P27708_C183_M1	F8VPD4;P27708	CAD	CAD protein;Multifunctional protein CAD	P27708	1	RILALDCGLKYNQ	Carbamidomethyl (C)	C	183	PRILALDCGLKYNQI	1	1	1	1	1		26680.1	33165	26235.2	7366.84	9014.25	3029.89	0.001486	4.43462	2.14881	0.023172	Up
P27797_C105_M1	P27797;Q53G71;V9HW88	CALR;;HEL-S-99n	Calreticulin;Calreticulin (Fragment);Calreticulin	P27797	1	HEQNIDCGGGYVK	Carbamidomethyl (C)	C	105	KHEQNIDCGGGYVKL	1	1	1	1	1	1	106968	134405	130104	2637.98	37701.9	37641.9	0.00248694	4.76364	2.25206	0.028769	Up
P27824_C360_M1	A0A7P0T937;A0A7P0TAE9;A0A7P0TB65;P27824	CANX	Calnexin	P27824	1	QIANPRCESAPGC	Carbamidomethyl (C)	C	360	PQIANPRCESAPGCG	0.997924	0.999065	0.999294				30705.4	37174.8	42370.6	23223.5	21847.1	21568.3	0.0130559	1.65445	0.726354	0.073574	Up
P30041_C91_M1	P30041;V9HWC7	PRDX6;HEL-S-128m	Peroxiredoxin-6	P30041	1	DINAYNCEEPTEK	Carbamidomethyl (C)	C	91	KDINAYNCEEPTEKL	1	1	1	1	1	1	114429	83963.5	87250.2	45255.8	49478.7	70335	0.0314931	1.73044	0.791141	0.119898	Up
P30050_C141_M1	P30050	RPL12	Large ribosomal subunit protein uL11	P30050	1	TAQSVGCNVDGRH	Carbamidomethyl (C)	C	141	GTAQSVGCNVDGRHP	1	1	1	1	1	1	72321.7	85704.4	67363.8	44655.7	40816.7	33365.5	0.00516455	1.89662	0.923429	0.043548	Up
P30520_C182_M1	A0A024R5Q7;P30520	ADSS;ADSS2	Adenylosuccinate synthetase isozyme 2	P30520	1	RSGLRMCDLVSDF	Carbamidomethyl (C)	C	182	ARSGLRMCDLVSDFD	1	1	1	1	1	1	24541.3	36555.2	27503.9	9878.29	13547	10288.9	0.00852001	2.62799	1.39396	0.0609132	Up
P31040_C536_M1	P31040	SDHA	Succinate dehydrogenase [ubiquinone] flavoprotein subunit, mitochondrial	P31040	1	SVLQEGCGKISKL	Carbamidomethyl (C)	C	536	GSVLQEGCGKISKLY	1	1	1	1	1	1	84268.5	56194	116942	34093.4	20142.8	8574.98	0.0271102	4.09807	2.03494	0.112493	Up
P31939_C434_M1	P31939;V9HWH7	ATIC;HEL-S-70p	Bifunctional purine biosynthesis protein ATIC	P31939	1	TQSNSVCYAKNGQ	Carbamidomethyl (C)	C	434	YTQSNSVCYAKNGQV	1	1	1	1		1	6752.22	7666.16	6002.34	2594.56	3544.49	3607.39	0.00362541	2.0952	1.06709	0.036625	Up
P31943_C22_M1	A0A384MEJ3;G8JLB6;P31943	;HNRNPH1;HNRNPH1	Epididymis secretory sperm binding protein;Heterogeneous nuclear ribonucleoprotein H1;Heterogeneous nuclear ribonucleoprotein H	P31943	1	RGLPWSCSADEVQ	Carbamidomethyl (C)	C	22	VRGLPWSCSADEVQR	1	1	1	1	1	1	404034	384176	372748	155061	136540	111924	8.27092e-05	2.87704	1.52459	0.00797536	Up
P31947_C38_M1	P31947	SFN	14-3-3 protein sigma	P31947	1	KGEELSCEERNLL	Carbamidomethyl (C)	C	38	EKGEELSCEERNLLS	1	1	1	1	1	1	75017.7	52956.3	55647.8	37555.1	16886.8	33854.5	0.02798	2.07961	1.05631	0.113666	Up
P33316_C222_M1	P33316	DUT	Deoxyuridine 5'-triphosphate nucleotidohydrolase, mitochondrial	P33316	1	RIAQLICERIFYP	Carbamidomethyl (C)	C	222	DRIAQLICERIFYPE	1	1	1	1	1	1	48352.8	55278.4	49170.6	18468.3	18033.7	15017.3	0.000158072	2.96592	1.56848	0.00963955	Up
P35579_C172_M1	A0A8I5KWT8;P35579	MYH9	Myosin-9	P35579	1	EDQSILCTGESGA	Carbamidomethyl (C)	C	172	REDQSILCTGESGAG	1	1	1	1	1	1	491516	423147	408211	83354.3	180343	212206	0.00370724	2.77971	1.47494	0.0367595	Up
P35998_C389_M1	A0A140VK70;C9JX88;P35998	;PSMC2;PSMC2	26S proteasome regulatory subunit 7	P35998	1	AEIRSVCTEAGMF	Carbamidomethyl (C)	C	389	GAEIRSVCTEAGMFA	1	1	1				73438.9	91224.2	96877.9	23874.6	12564.8	18794.5	0.000905406	4.73516	2.24341	0.0160353	Up
P36578_C208_M1	P36578;Q59GY2	RPL4;	Large ribosomal subunit protein uL4;Large ribosomal subunit protein uL4 (Fragment)	P36578	1	IQRRGPCIIYNED	Carbamidomethyl (C)	C	208	RIQRRGPCIIYNEDN	1	1	1	1	1	1	82427.3	110603	114262	47051.6	47650.2	44347.5	0.00516391	2.20995	1.14402	0.043548	Up
P37837_C250_M1	A0A140VK56;P37837	;TALDO1	Transaldolase	P37837	1	IKALAGCDFLTIS	Carbamidomethyl (C)	C	250	EIKALAGCDFLTISP	1	1	1	1	1	1	75099.1	84126.9	83021.1	32703.9	38438.1	31987.1	0.000187515	2.34897	1.23203	0.0108536	Up
P38646_C608_M1	A0A384P5G6;B7Z4V2;P38646;V9HW84	;;HSPA9;HEL-S-124m	Stress-70 protein, mitochondrial;Stress-70 protein, mitochondrial;Stress-70 protein, mitochondrial;Stress-70 protein, mitochondrial	P38646	1	QLPADECNKLKEE	Carbamidomethyl (C)	C	608	DQLPADECNKLKEEI	1	1	1	1	1	1	18606.3	24161.5	23903.5	13597.8	13867.7	15778.6	0.0156873	1.54174	0.624562	0.0812928	Up
P39656_C145_M1	A0A0C4DGS1;P39656	DDOST	Dolichyl-diphosphooligosaccharide--protein glycosyltransferase 48 kDa subunit	P39656	1	RELGSECGIEFDE	Carbamidomethyl (C)	C	145	LRELGSECGIEFDEE	1	1	1	1	1	1	73406.7	74023.4	64308.2	26171.3	22491.3	13912.4	0.000490843	3.38375	1.75862	0.0121466	Up
P40926_C93_M1	A0A024R4K3;P40926;Q0QF37;Q6FHZ0;Q75MT9	;MDH2;MDH2;MDH2;MDH2	Malate dehydrogenase;Malate dehydrogenase, mitochondrial;Malate dehydrogenase (Fragment);Malate dehydrogenase;Malate dehydrogenase (Fragment)	P40926	1	PDCLKGCDVVVIP	Carbamidomethyl (C)	C	93	LPDCLKGCDVVVIPA	1	1	1	1	1	1	87362.6	111263	114859	65868.3	61320.9	70368.3	0.012784	1.5868	0.666121	0.0734247	Up
P40939_C322_M1	E9KL44;H0YFD6;P40939	;HADHA;HADHA	enoyl-CoA hydratase;enoyl-CoA hydratase;Trifunctional enzyme subunit alpha, mitochondrial	P40939	1	SDAGYLCESQKFG	Carbamidomethyl (C)	C	322	GSDAGYLCESQKFGE	1	1	1	1	1	1	12671	16435.4	20320.3	6303.23	903.941	5136.07	0.0108749	4.00436	2.00157	0.0677918	Up
P41252_C433_M1	A0A804HJN6;A0A804HL54;P41252;Q59G75	IARS1;IARS1;IARS1;	isoleucine--tRNA ligase;isoleucine--tRNA ligase;Isoleucine--tRNA ligase, cytoplasmic;isoleucine--tRNA ligase (Fragment)	P41252	1	LRNNDLCYWVPEL	Carbamidomethyl (C)	C	433	LLRNNDLCYWVPELV	1	1	1				102013	127952	107766	22653.6	42180.4	28452	0.00112803	3.62037	1.85614	0.0187914	Up
P42166_C341_M1	P42166	TMPO	Lamina-associated polypeptide 2, isoform alpha	P42166	1	SGIQPLCPERSHI	Carbamidomethyl (C)	C	341	KSGIQPLCPERSHIS	1	1	1		1	1	649547	853224	728874	61319.2	274369	293137	0.00493051	3.54892	1.82738	0.0421922	Up
P42166_C684_M1	P42166	TMPO	Lamina-associated polypeptide 2, isoform alpha	P42166	1	LFGGEVCKVIKKR	Carbamidomethyl (C)	C	684	TLFGGEVCKVIKKRG	1	1	1	1	1		78773.4	68210.9	70952.3	33807.9	37466.8	15434.6	0.00433861	2.51341	1.32965	0.0404818	Up
P42285_C399_M1	P42285	MTREX	Exosome RNA helicase MTR4	P42285	1	SFSKKDCEAYALQ	Carbamidomethyl (C)	C	399	FSFSKKDCEAYALQM	1	1	1				268821	324159	301426	18515.3	49787.5	12233	0.000164974	11.1057	3.47323	0.00988398	Up
P43243_C806_M1	A0A0R4J2E8;A8MXP9;P43243	MATR3	Matrin-3;Matrin 3;Matrin-3	P43243	1	GFYCKLCSLFYTN	Carbamidomethyl (C)	C	806	TGFYCKLCSLFYTNE	1	1	1	1	1	1	98487.3	116775	133091	41879.3	22271.5	19080.4	0.00197311	4.18537	2.06535	0.0250209	Up
P43246_C199_M1	P43246	MSH2	DNA mismatch repair protein Msh2	P43246	1	QIGPKECVLPGGE	Carbamidomethyl (C)	C	199	IQIGPKECVLPGGET	1	1	1	1	1	1	52735	57977.7	55449.3	25817.5	38862.6	32355.9	0.00475022	1.71237	0.775998	0.0418093	Up
P43490_C39_M1	A0A7P0T9I9;P43490	NAMPT	Nicotinamide phosphoribosyltransferase	P43490	1	VYSYFECREKKTE	Carbamidomethyl (C)	C	39	KVYSYFECREKKTEN	1	1	1	1	1	1	30988.2	32235.9	34058.2	16948.4	15506.4	20023.8	0.00073853	1.85375	0.890449	0.0145439	Up
P43490_C397_M1	A0A7P0T9I9;P43490	NAMPT	Nicotinamide phosphoribosyltransferase	P43490	1	TRDLLNCSFKCSY	Carbamidomethyl (C)	C	397	LTRDLLNCSFKCSYV	1	1	1	1	1	1	28105.6	20433.5	20515.8	13145	11593.1	13402.4	0.0167531	1.81054	0.856419	0.0842297	Up
P45880_C47_M1	A0A024QZT0;A0A0A0MR02;P45880	VDAC2	Voltage-dependent anion-selective channel protein 2;Voltage-dependent anion-selective channel protein 2 (Fragment);Voltage-dependent anion-selective channel protein 2	P45880	1	DVKTKSCSGVEFS	Carbamidomethyl (C)	C	47	LDVKTKSCSGVEFST	1	1	1	1	1	1	9828.61	19219.8	13700.2	4814.04	6593.59	7095.65	0.0452576	2.31033	1.2081	0.150659	Up
P45880_C76_M1	A0A024QZT0;A0A0A0MR02;P45880	VDAC2	Voltage-dependent anion-selective channel protein 2;Voltage-dependent anion-selective channel protein 2 (Fragment);Voltage-dependent anion-selective channel protein 2	P45880	1	ETKYKWCEYGLTF	Carbamidomethyl (C)	C	76	LETKYKWCEYGLTFT	1	1	1	1	1	1	43719.7	51555	42961.2	13158.1	22089.1	19673.5	0.00191803	2.51701	1.33171	0.0249052	Up
P45974_C838_M1	A0A140VJZ1;P45974	;USP5	Ubiquitin carboxyl-terminal hydrolase;Ubiquitin carboxyl-terminal hydrolase 5	P45974	1	YNDQKVCASEKPP	Carbamidomethyl (C)	C	838	IYNDQKVCASEKPPK	1	1	1				16356.8	14697.3	13241.4	10855.9	9377.59	9119.45	0.00901453	1.50906	0.593652	0.0625597	Up
P46060_C141_M1	P46060	RANGAP1	Ran GTPase-activating protein 1	P46060	1	LLKSSACFTLQEL	Carbamidomethyl (C)	C	141	ALLKSSACFTLQELK	1	1	1	1	1		29454.9	40064.4	29242	19222.9	22791.1	19019.1	0.0291063	1.61816	0.694355	0.115311	Up
P48444_C441_M1	B0YIW5;B0YIW6;P48444;Q6MZV5	ARCN1;ARCN1;ARCN1;DKFZp686M09245	Coatomer subunit delta	P48444	1	RNTLEWCLPVIDA	Carbamidomethyl (C)	C	441	RRNTLEWCLPVIDAK	1	1	1	1			15291.6	25070.6	26249.3	5915.2	3694.96	2389.61	0.00735534	5.55107	2.47276	0.0564986	Up
P48637_C422_M1	A0A2R8Y430;P48637;V9HWJ1	GSS;GSS;HEL-S-64p	Glutathione synthetase	P48637	1	PARVVQCISELGI	Carbamidomethyl (C)	C	422	SPARVVQCISELGIF				1	1	1	10384.5	11370	10486.1	6680.72	5491.35	4136.17	0.00265881	1.97695	0.983276	0.0299263	Up
P48643_C429_M1	P48643;V9HW37	CCT5;HEL-S-69	T-complex protein 1 subunit epsilon	P48643	1	GAAEISCALAVSQ	Carbamidomethyl (C)	C	429	GGAAEISCALAVSQE				1			18250.9	14449.4	12487.6	4241.53	5458.34	2828.63	0.00420605	3.60681	1.85072	0.0398433	Up
P48735_C418_M1	P48735;Q53GL5	IDH2;	Isocitrate dehydrogenase [NADP], mitochondrial;Isocitrate dehydrogenase [NADP], mitochondrial (Fragment)	P48735	1	TKDLAGCIHGLSN	Carbamidomethyl (C)	C	418	MTKDLAGCIHGLSNV	1	1	1	1			101778	116702	56609.7	3558.53	3711.91	2446.58	0.00806998	28.3101	4.82325	0.0596515	Up
P49327_C223_M1	P49327	FASN	Fatty acid synthase	P49327	1	TAGNGYCRSEGVV	Carbamidomethyl (C)	C	223	DTAGNGYCRSEGVVA	1	1	1	1	1	1	11763	10227.8	6921.56	5202.06	1989.74	5644.93	0.0432282	2.25232	1.17141	0.148313	Up
P49327_C2273_M1	P49327	FASN	Fatty acid synthase	P49327	1	PTYGLQCTRAAPL	Carbamidomethyl (C)	C	2273	IPTYGLQCTRAAPLD	1	1	1	1	1	1	59301.6	53066.9	79974.8	18127.1	34113.4	15985.8	0.0141277	2.81919	1.49528	0.0762949	Up
P49368_C173_M1	B3KX11;P49368;Q59H77	;CCT3;	T-complex protein 1 subunit gamma;T-complex protein 1 subunit gamma;T-complex protein 1 subunit gamma (Fragment)	P49368	1	RWSSLACNIALDA	Carbamidomethyl (C)	C	173	SRWSSLACNIALDAV	1	1	1	1			80273.2	99653.3	78025.8	21984.6	12287.5	18927	0.000783302	4.84881	2.27763	0.015028	Up
P49662_C109_M1	E9PMT1;P49662	CASP4	Caspase 4 (Fragment);Caspase-4	P49662	1	TDALKLCPHEEFL	Carbamidomethyl (C)	C	109	STDALKLCPHEEFLR	1	1	1			1	6525.48	8601.23	6401.97	4048.13	3739.29	4978.29	0.0221638	1.68645	0.753986	0.100251	Up
P49721_C46_M1	A0A140VJS6;P49721	;PSMB2	Proteasome subunit beta;Proteasome subunit beta type-2	P49721	1	EKILLLCVGEAGD	Carbamidomethyl (C)	C	46	SEKILLLCVGEAGDT				1	1	1	3591.88	5520.82	6748.04	1874.75	790.891	1773.59	0.0178553	3.57286	1.83708	0.0884992	Up
P49903_C71_M1	P49903;Q5T5U6	SEPHS1	Selenide, water dikinase 1;Selenophosphate synthetase 1 (Fragment)	P49903	1	GIGMDTCVIPLRH	Carbamidomethyl (C)	C	71	LGIGMDTCVIPLRHG	1	1	1	1			8744.05	10235.9	7018.36	6600.06	5390.78	4275.59	0.0473857	1.59828	0.676518	0.154217	Up
P49915_C523_M1	A0A140VJK6;B4DUT7;P49915	;;GMPS	GMP synthase (glutamine-hydrolyzing);GMP synthase (glutamine-hydrolyzing);GMP synthase [glutamine-hydrolyzing]	P49915	1	VGVQGDCRSYSYV	Carbamidomethyl (C)	C	523	TVGVQGDCRSYSYVC	1	1	1	1	1	1	7649.74	8770.94	9296.25	6666.79	3164.81	4536.95	0.0285213	1.78981	0.839805	0.113666	Up
P50991_C450_M1	B7Z9L0;P50991	;CCT4	T-complex protein 1 subunit delta	P50991	1	SGMESYCVRAFAD	Carbamidomethyl (C)	C	450	LSGMESYCVRAFADA	1	1	1	1	1	1	32690.1	23160	23631.6	11576.1	9056.8	14643.7	0.0135417	2.2531	1.17191	0.0740493	Up
P51148_C64_M1	P51148	RAB5C	Ras-related protein Rab-5C	P51148	1	FLTQTVCLDDTTV	Carbamidomethyl (C)	C	64	AFLTQTVCLDDTTVK				1	1		7149.77	9304.17	9732.16	5191.13	1830.47	3411.44	0.0139583	2.50992	1.32764	0.0755432	Up
P51991_C196_M1	A0A384NL63;A0A7I2V2R3;A0A7I2V5D8;P51991	HNRPA3;HNRNPA3;HNRNPA3;HNRNPA3	Epididymis secretory sperm binding protein;Heterogeneous nuclear ribonucleoprotein A3;Heterogeneous nuclear ribonucleoprotein A3;Heterogeneous nuclear ribonucleoprotein A3	P51991	1	TINGHNCEVKKAL	Carbamidomethyl (C)	C	196	HTINGHNCEVKKALS	1	1	1	1	1	1	20102.6	21125.5	26057.1	13318	9476.7	12360.4	0.00785032	1.91395	0.936557	0.0591806	Up
P52788_C237_M1	P52788	SMS	Spermine synthase	P52788	1	KYMRKTCGDVLDN	Carbamidomethyl (C)	C	237	KKYMRKTCGDVLDNL	1	1	1				26101.1	32374.3	37173.3	11394.3	9786.02	17463	0.00871512	2.47517	1.30753	0.0616193	Up
P53007_C262_M1	D9HTE9;P53007;Q6LAP8	SLC25A1;SLC25A1;	Citrate transport protein;Tricarboxylate transport protein, mitochondrial;Citrate transport protein (Fragment)	P53007	1	YRNTWDCGLQILK	Carbamidomethyl (C)	C	262	KYRNTWDCGLQILKK	1	1	1				51466.4	88501.6	80933.1	31137.3	22251.3	23047.6	0.0144451	2.89001	1.53107	0.0770781	Up
P54136_C369_M1	P54136	RARS1	Arginine--tRNA ligase, cytoplasmic	P54136	1	IVFVPGCSIPLTI	Carbamidomethyl (C)	C	369	KIVFVPGCSIPLTIV	1	1	1	1		1	3557.83	5609.33	6076.5	390.556	1406.08	967.724	0.00735117	5.51435	2.46319	0.0564986	Up
P55072_C105_M1	A0A7P0TAW3;P55072	VCP	Transitional endoplasmic reticulum ATPase	P55072	1	VISIQPCPDVKYG	Carbamidomethyl (C)	C	105	DVISIQPCPDVKYGK	1	1	1	1	1	1	60251.4	65730.8	60029.8	36369	36445.7	33589.9	0.000220726	1.74816	0.805836	0.0115412	Up
P55145_C117_M1	A8K878;P55145	;MANF	cDNA FLJ77177, highly similar to Homo sapiens arginine-rich, mutated in early stage tumors (ARMET), mRNA;Mesencephalic astrocyte-derived neurotrophic factor	P55145	1	KKDSQICELKYDK	Carbamidomethyl (C)	C	117	KKKDSQICELKYDKQ	1	1	1	1	1	1	585342	563515	527355	197340	150706	122487	0.000129525	3.56237	1.83284	0.00867311	Up
P60174_C42_M1	P60174;V9HWK1	TPI1;HEL-S-49	Triosephosphate isomerase	P60174	1	ADTEVVCAPPTAY	Carbamidomethyl (C)	C	42	PADTEVVCAPPTAYI	1	1	1	1	1	1	63100.3	69956.3	60063.6	17508.9	8652.4	8226.29	0.000230448	5.61598	2.48954	0.0115412	Up
P60660_C2_M1	F8W1R7;G3V1V0;P60660	MYL6	Myosin light chain 6;Myosin light polypeptide 6;Myosin light polypeptide 6	P60660	1	_____MCDFTEDQ	Carbamidomethyl (C)	C	2	______MCDFTEDQT	1	1	1	1	1	1	89484.5	113408	103817	33905.8	67821.6	57560.5	0.0158171	1.92551	0.945239	0.0815944	Up
P60709_C285_M1	P60709;Q1KLZ0;Q53G76;Q53GK6	ACTB;PS1TP5BP1;;	Actin, cytoplasmic 1;HCG15971, isoform CRA_a;Beta actin variant (Fragment);Beta actin variant (Fragment)	P60709	1	FNSIMKCDVDIRK	Carbamidomethyl (C)	C	285	TFNSIMKCDVDIRKD	1	1	1	1	1	1	53120.9	50942.2	55072.4	22109.9	20185.8	23676.6	3.78307e-05	2.41216	1.27032	0.00516767	Up
P60981_C23_M1	P60981;V9HWA6	DSTN;HEL32	Destrin	P60981	1	DMKVRKCSTPEEI	Carbamidomethyl (C)	C	23	YDMKVRKCSTPEEIK	1	1	1	1	1		40031.4	31015.1	40087.1	7367.75	7932.31	4596.77	0.000672762	5.58549	2.48168	0.013838	Up
P61158_C189_M1	P61158	ACTR3	Actin-related protein 3	P61158	1	GYVIGSCIKHIPI	Carbamidomethyl (C)	C	189	EGYVIGSCIKHIPIA				1	1		10965.1	19312.6	18012	5232.73	4086.7	9408.11	0.0321409	2.57853	1.36655	0.120484	Up
P61586_C16_M1	A0A024R324;B4DKN9;P61586	RHOA;;RHOA	Transforming protein RhoA	P61586	1	IVGDGACGKTCLL	Carbamidomethyl (C)	C	16	VIVGDGACGKTCLLI	1	1	1	1	1	1	53631.8	59345	50817.4	22994.6	24781.6	24314.3	0.000284053	2.27207	1.184	0.0115412	Up
P62241_C71_M1	P62241;Q5JR94	RPS8	Small ribosomal subunit protein eS8;40S ribosomal protein S8	P62241	1	FSWGSECCTRKTR	Carbamidomethyl (C)	C	71	NFSWGSECCTRKTRI	0.5	0.5	0.99908	0.5	0.454291	0.5	28306.6	20297.1	16459.9	8286.18	11830.1	10015.6	0.0328464	2.15929	1.11056	0.122859	Up
P62280_C116_M1	P62280	RPS11	Small ribosomal subunit protein uS17	P62280	1	SVHLSPCFRDVQI	Carbamidomethyl (C)	C	116	MSVHLSPCFRDVQIG	1	1	1		1		98152	165029	106725	35756.9	12893.9	3489.3	0.0101289	7.09447	2.8267	0.0667536	Up
P62316_C63_M1	P62316	SNRPD2	Small nuclear ribonucleoprotein Sm D2	P62316	1	KAFDRHCNMVLEN	Carbamidomethyl (C)	C	63	VKAFDRHCNMVLENV	1	1	1	1	1		77653.8	70309.9	62025.3	10255.7	13179.1	4596.77	0.00030188	7.49118	2.90519	0.0115412	Up
P62424_C199_M1	P62424	RPL7A	Large ribosomal subunit protein eL8	P62424	1	LVHRKTCTTVAFT	Carbamidomethyl (C)	C	199	RLVHRKTCTTVAFTQ	1	1	1	1	1	1	24574.9	36897	22976.2	11581.4	17167.1	14821.5	0.043794	1.93822	0.954729	0.14949	Up
P62701_C181_M1	B2R491;P62701;Q96IR1	RPS4X	40S ribosomal protein S4;Small ribosomal subunit protein eS4, X isoform;RPS4X protein (Fragment)	P62701	1	FDTGNLCMVTGGA	Carbamidomethyl (C)	C	181	KFDTGNLCMVTGGAN	1	1	1	1	1	1	17436.6	19071.4	22778.6	8702.85	5086.69	12546.1	0.0147108	2.25119	1.17069	0.0775269	Up
P62714_C251_M1	A0A140VJS0;B3KRM2;P62714;Q5U0I7;Q8WZ56	;;PPP2CB;;	Serine/threonine-protein phosphatase;Serine/threonine-protein phosphatase;Serine/threonine-protein phosphatase 2A catalytic subunit beta isoform;Serine/threonine-protein phosphatase;Serine/threonine-protein phosphatase	P62714	1	MEGYNWCHDRNVV	Carbamidomethyl (C)	C	251	VMEGYNWCHDRNVVT	1	1	1				95190.4	145619	102312	67047.6	59454.7	57947.2	0.0298149	1.86025	0.895496	0.116036	Up
P62714_C266_M1	A0A140VJS0;B3KRM2;P62714;Q5U0I7;Q8WZ56	;;PPP2CB;;	Serine/threonine-protein phosphatase;Serine/threonine-protein phosphatase;Serine/threonine-protein phosphatase 2A catalytic subunit beta isoform;Serine/threonine-protein phosphatase;Serine/threonine-protein phosphatase	P62714	1	FSAPNYCYRCGNQ	Carbamidomethyl (C)	C	266	IFSAPNYCYRCGNQA	1	1	1	1		1	12140.4	13527.7	9617.65	2630.15	3930.29	6876.98	0.0127929	2.62593	1.39283	0.0734247	Up
P62937_C161_M1	A8K486;P62937;V9HWF5	;PPIA;HEL-S-69p	Peptidyl-prolyl cis-trans isomerase;Peptidyl-prolyl cis-trans isomerase A;Peptidyl-prolyl cis-trans isomerase	P62937	1	KITIADCGQLE__	Carbamidomethyl (C)	C	161	KKITIADCGQLE___	1	1	1	1	1	1	312635	340413	523754	170199	193579	138779	0.0299348	2.34163	1.22751	0.116036	Up
P63000_C157_M1	A0A994J6T1;A4D2P0;A4D2P1;P63000	RAC1	Ras-related C3 botulinum toxin substrate 1	P63000	1	AVKYLECSALTQR	Carbamidomethyl (C)	C	157	GAVKYLECSALTQRG	1	1	1	1	1	1	155231	163454	140587	67031.1	92086.4	74629.7	0.00166769	1.96482	0.974397	0.0242347	Up
P63010_C391_M1	A0A140VJE8;A8K0G3;A8K916;P63010	AP2B1;;;AP2B1	AP complex subunit beta;AP complex subunit beta;AP complex subunit beta;AP-2 complex subunit beta	P63010	1	EQSAERCVSTLLD	Carbamidomethyl (C)	C	391	VEQSAERCVSTLLDL	1	1	1	1			5567.01	6930.88	6434.56	1869.95	1979.61	1742.98	0.00038865	3.38531	1.75929	0.0115412	Up
P63104_C94_M1	D0PNI1;P63104	YWHAZ	14-3-3 protein zeta/delta	P63104	1	TELRDICNDVLSL	Carbamidomethyl (C)	C	94	ETELRDICNDVLSLL	1	1	1	1		1	22449.1	39081.8	28740.2	10389.3	3121	6431.73	0.0113658	4.52668	2.17845	0.0697946	Up
P63151_C262_M1	A0A140VJT0;P63151;Q56VW8	;PPP2R2A;	Serine/threonine-protein phosphatase 2A 55 kDa regulatory subunit B;Serine/threonine-protein phosphatase 2A 55 kDa regulatory subunit B alpha isoform;Serine/threonine-protein phosphatase 2A 55 kDa regulatory subunit B	P63151	1	MRASALCDRHSKL	Carbamidomethyl (C)	C	262	DMRASALCDRHSKLF	1	1	1				34940	45512	64653.3	16884.2	8625.09	15684	0.0187911	3.52255	1.81662	0.0920683	Up
P63244_C138_M1	E9KL35;P63244	;RACK1	Small ribosomal subunit protein RACK1	P63244	1	WNTLGVCKYTVQD	Carbamidomethyl (C)	C	138	LWNTLGVCKYTVQDE	1	1	1	1	1	1	51887.5	49541	49841.3	32832.1	36734.7	28564.6	0.00200753	1.5415	0.624337	0.0250209	Up
P63244_C249_M1	E9KL35;P63244	;RACK1	Small ribosomal subunit protein RACK1	P63244	1	PNRYWLCAATGPS	Carbamidomethyl (C)	C	249	SPNRYWLCAATGPSI	1	1	1	1	1	1	56883.9	74643.3	66715.6	27890.8	34897	54392.6	0.0459176	1.69177	0.758538	0.151946	Up
P67870_C109_M1	N0E4C7;P67870;Q5SRQ3;Q5SRQ6	CSNK2B	Casein kinase II subunit beta	P67870	1	QGDFGYCPRVYCE	Carbamidomethyl (C)	C	109	QQGDFGYCPRVYCEN	1	1	1	1	1	1	28082.8	29888.2	30449.6	10104.3	20570.5	22959.7	0.0445457	1.64858	0.721221	0.149764	Up
P68363_C295_M1	B3KPS3;B3KT06;P68363	;;TUBA1B	Tubulin alpha chain;Tubulin alpha chain;Tubulin alpha-1B chain	P68363	1	AEITNACFEPANQ	Carbamidomethyl (C)	C	295	VAEITNACFEPANQM	1	1	1	1			62811.8	62652	57166.7	1407.83	1202.92	2351.64	6.16916e-06	36.8029	5.20175	0.00300967	Up
P68363_C347_M1	B3KPS3;B3KT06;P68363	;;TUBA1B	Tubulin alpha chain;Tubulin alpha chain;Tubulin alpha-1B chain	P68363	1	IQFVDWCPTGFKV	Carbamidomethyl (C)	C	347	SIQFVDWCPTGFKVG	1	1	1	1	1	1	329981	372595	361513	31064.3	38024.5	33661.8	1.57121e-05	10.356	3.3724	0.00376266	Up
P78417_C192_M1	B2R983;P78417;V9HWG9	;GSTO1;HEL-S-21	Glutathione S-transferase omega;Glutathione S-transferase omega-1;Glutathione S-transferase omega	P78417	1	AMKLNECVDHTPK	Carbamidomethyl (C)	C	192	EAMKLNECVDHTPKL	1	1	1	1	1		12598.7	14099.4	11815.8	5047.35	3546.44	3209.31	0.000528602	3.26303	1.70621	0.0126236	Up
P78527_C1742_M1	P78527	PRKDC	DNA-dependent protein kinase catalytic subunit	P78527	1	FNNYVDCMKKFLD	Carbamidomethyl (C)	C	1742	RFNNYVDCMKKFLDA	1	1	1	1			7708.58	8602.1	12235	4973.82	2915.43	2383.68	0.0187453	2.77873	1.47443	0.0920683	Up
P82932_C105_M1	P82932	MRPS6	Small ribosomal subunit protein bS6m	P82932	1	TQELKECEGIVPV	Carbamidomethyl (C)	C	105	LTQELKECEGIVPVP	1	1	1	1		1	30558	30908.2	22288.7	6158.02	1856.12	11548.5	0.00575323	4.28137	2.09807	0.0480374	Up
Q00610_C459_M1	A0A087WVQ6;A0A8V8TQ14;A0A8V8TR47;A0A8V8TRF0;K7EJJ5;Q00610	CLTC	Clathrin heavy chain;Clathrin heavy chain;Clathrin heavy chain;Clathrin heavy chain;Clathrin heavy chain;Clathrin heavy chain 1	Q00610	1	KEDKLECSEELGD	Carbamidomethyl (C)	C	459	LKEDKLECSEELGDL	1	1	1	1	1		97935.6	142646	117894	75123.2	68414.4	56725.6	0.0196751	1.79002	0.839979	0.0937327	Up
Q00610_C870_M1	A0A087WVQ6;A0A8V8TQ14;A0A8V8TR47;A0A8V8TRF0;K7EJJ5;Q00610	CLTC	Clathrin heavy chain;Clathrin heavy chain;Clathrin heavy chain;Clathrin heavy chain;Clathrin heavy chain;Clathrin heavy chain 1	Q00610	1	ARIHEGCEEPATH	Carbamidomethyl (C)	C	870	EARIHEGCEEPATHN	1	1	1	1		1	7323.48	8873.33	8510.14	2303.32	3865.01	898.935	0.00382685	3.49597	1.80569	0.0370233	Up
Q00839_C594_M1	B3KX72;Q00839	;HNRNPU	cDNA FLJ44920 fis, clone BRAMY3011501, highly similar to Heterogeneous nuclear ribonucleoprotein U;Heterogeneous nuclear ribonucleoprotein U	Q00839	1	AQRRKMCLFAGFQ	Carbamidomethyl (C)	C	594	AAQRRKMCLFAGFQR	1	1	1	1	1	1	35089.1	44172	39099.6	9131.67	9938.5	5677.49	0.000443112	4.7827	2.25783	0.0118899	Up
Q00839_C607_M1	B3KX72;Q00839	;HNRNPU	cDNA FLJ44920 fis, clone BRAMY3011501, highly similar to Heterogeneous nuclear ribonucleoprotein U;Heterogeneous nuclear ribonucleoprotein U	Q00839	1	RKAVVVCPKDEDY	Carbamidomethyl (C)	C	607	QRKAVVVCPKDEDYK	1	1	1	1	1	1	25140.7	28635.6	35684.1	6720.95	12698.2	18971.5	0.0223718	2.33027	1.2205	0.100431	Up
Q01082_C1389_M1	B2ZZ89;Q01082	SPTBN1	Spectrin beta chain;Spectrin beta chain, non-erythrocytic 1	Q01082	1	ELFTQSCADLDKW	Carbamidomethyl (C)	C	1389	AELFTQSCADLDKWL	1	1	1				21633.5	30284.5	29933.5	17354.6	12957.2	9329.15	0.0183464	2.06482	1.04602	0.0906701	Up
Q01082_C964_M1	B2ZZ89;Q01082	SPTBN1	Spectrin beta chain;Spectrin beta chain, non-erythrocytic 1	Q01082	1	QNYHLECNETKSW	Carbamidomethyl (C)	C	964	IQNYHLECNETKSWI				1		1	17418.3	21627.7	12457.9	4404.52	4431.38	2203.66	0.00802585	4.6654	2.222	0.0595832	Up
Q02388_C1048_M1	Q02388	COL7A1	Collagen alpha-1(VII) chain	Q02388	1	VTQTPVCPRGLAD	Carbamidomethyl (C)	C	1048	SVTQTPVCPRGLADV		1					23208.2	28510.2	20394.9	13304.3	14075.6	7835.2	0.0163115	2.0478	1.03407	0.0835139	Up
Q05639_C411_M1	A0A2U3TZH3;A0A9L9PYI8;Q05639	EEF1A2	Elongation factor 1-alpha;Elongation factor 1-alpha 2;Elongation factor 1-alpha 2	Q05639	1	VPGKPMCVESFSQ	Carbamidomethyl (C)	C	411	MVPGKPMCVESFSQY	1	1	1	1	1	1	42578.9	41286.8	32309.1	3657.08	5083.32	1292.35	0.000489103	11.5796	3.53351	0.0121466	Up
Q06AH7_C503_M1	Q06AH7	TF	Serotransferrin	Q06AH7	1	EFFSEGCAPGSKK	Carbamidomethyl (C)	C	503	DEFFSEGCAPGSKKD	1	1	1	1	1	1	86341.5	111924	103543	5653.3	11451.5	3334.32	0.000289296	14.7662	3.88423	0.0115412	Up
Q06AH7_C67_M1	Q06AH7	TF	Serotransferrin	Q06AH7	1	KASYLDCIRAIAA	Carbamidomethyl (C)	C	67	KKASYLDCIRAIAAN	1	1	1				25156.3	20388.1	23077.9	16027.2	8704.93	16502.4	0.0337352	1.6642	0.734825	0.125633	Up
Q08211_C1029_M1	Q08211	DHX9	ATP-dependent RNA helicase A	Q08211	1	HKSSVNCPFSSQD	Carbamidomethyl (C)	C	1029	IHKSSVNCPFSSQDM	1	1	1	1	1	1	54405.7	69463.5	54436.6	28160	35499.8	31430	0.00701043	1.87513	0.906991	0.0555466	Up
Q08945_C200_M1	Q08945	SSRP1	FACT complex subunit SSRP1	Q08945	1	ATGDAICIFRELQ	Carbamidomethyl (C)	C	200	QATGDAICIFRELQC	1	1	1	1	1		14325.5	26274	30193.1	7058.08	4848.29	3594.52	0.0194681	4.567	2.19125	0.0937327	Up
Q08J23_C502_M1	Q08J23	NSUN2	RNA cytosine C(5)-methyltransferase NSUN2	Q08J23	1	SKKDGVCGPPPSK	Carbamidomethyl (C)	C	502	GSKKDGVCGPPPSKK	1	1	1	1	1		9230.75	7949.15	6569.43	4654.11	3474.75	2529.14	0.011381	2.22831	1.15595	0.0697946	Up
Q09666_C2806_M1	Q09666	AHNAK	Neuroblast differentiation-associated protein AHNAK	Q09666	1	PKVDVECPDVNIE	Carbamidomethyl (C)	C	2806	GPKVDVECPDVNIEG	1	1	1	1	1	1	17364.9	25239.3	37845.2	8391.75	3858.61	3722.31	0.0251286	5.03669	2.33248	0.107134	Up
Q0JRZ9_C86_M1	Q0JRZ9	FCHO2	F-BAR domain only protein 2	Q0JRZ9	1	TEKLANCHLDLVR	Carbamidomethyl (C)	C	86	STEKLANCHLDLVRK	1	1	1			1	121831	86775.7	123495	32580.6	10872.5	2155.79	0.003125	7.28151	2.86424	0.0326357	Up
Q0QF37_C72_M1	A0A024R4K3;P40926;Q0QF37;Q6FHZ0;Q75MT9	;MDH2;MDH2;MDH2;MDH2	Malate dehydrogenase;Malate dehydrogenase, mitochondrial;Malate dehydrogenase (Fragment);Malate dehydrogenase;Malate dehydrogenase (Fragment)	Q0QF37	1	PDCLKGCDVVVIP	Carbamidomethyl (C)	C	72	LPDCLKGCDVVVIPA	1	1	1	1	1	1	87362.6	111263	114859	65868.3	61320.9	70368.3	0.012784	1.5868	0.666121	0.0734247	Up
Q12907_C202_M1	A0A384NPY7;A8K7T4;B4DWN1;Q12907	LMAN2;;;LMAN2	Epididymis secretory sperm binding protein;cDNA FLJ75774, highly similar to Homo sapiens lectin, mannose-binding 2 (LMAN2), mRNA;cDNA FLJ52285, highly similar to Vesicular integral-membrane protein VIP36;Vesicular integral-membrane protein VIP36	Q12907	1	WTELAGCTADFRN	Carbamidomethyl (C)	C	202	RWTELAGCTADFRNR	1	1	1	1	1	1	23732.2	30222.2	37737.6	19992.1	17761.2	19430.4	0.0485933	1.60347	0.681193	0.156149	Up
Q12933_C156_M1	E5KBQ3;Q12933	TRAF2	TNF receptor-associated factor;TNF receptor-associated factor 2	Q12933	1	RHLEHECPERSLS	Carbamidomethyl (C)	C	156	ERHLEHECPERSLSC	1	1		1			14090.5	10496.1	10536.5	3494.29	3640.7	2446.58	0.00242396	3.6657	1.87409	0.0285651	Up
Q13011_C187_M1	A0A384MR44;Q13011	;ECH1	Epididymis secretory sperm binding protein;Delta(3,5)-Delta(2,4)-dienoyl-CoA isomerase, mitochondrial	Q13011	1	ACDIRYCAQDAFF	Carbamidomethyl (C)	C	187	TACDIRYCAQDAFFQ	1	1	1	1	1	1	112111	147093	151210	32053.2	48903.4	52746.8	0.00270306	3.06958	1.61804	0.0299263	Up
Q13185_C177_M1	A4D177;Q13185	CBX3	Chromobox homolog 3 (HP1 gamma homolog, Drosophila);Chromobox protein homolog 3	Q13185	1	RLTWHSCPEDEAQ	Carbamidomethyl (C)	C	177	ERLTWHSCPEDEAQ_	1	1	1	1	1	1	37786.5	49388.2	41015.2	25458.1	13877.6	11445.9	0.0095782	2.52434	1.33591	0.0649877	Up
Q13242_C138_M1	A0A9L9PX63;A0A9L9PY11;Q13242	SRSF9	Serine and arginine rich splicing factor 9;Serine and arginine rich splicing factor 9;Serine/arginine-rich splicing factor 9	Q13242	1	REAGDVCYADVQK	Carbamidomethyl (C)	C	138	MREAGDVCYADVQKD	1	1	1	1	1	1	28669.5	23153.2	23243.1	7630.68	11039.2	4133.47	0.00297877	3.29187	1.71891	0.0313966	Up
Q13451_C215_M1	B7Z8G2;Q13451;Q2TA84;Q53GX4	;FKBP5;FKBP5;	peptidylprolyl isomerase;Peptidyl-prolyl cis-trans isomerase FKBP5;peptidylprolyl isomerase;peptidylprolyl isomerase (Fragment)	Q13451	1	MQREEQCILYLGP	Carbamidomethyl (C)	C	215	KMQREEQCILYLGPR				1			22927	24300.3	30087.9	9156.63	4200.1	3738.66	0.00199569	4.52257	2.17714	0.0250209	Up
Q13813_C2120_M1	A0A0D9SF54;A0A0D9SFF6;A0A384P5S9;A0A994J6W3;Q13813	SPTAN1;SPTAN1;;SPTAN1;SPTAN1	Spectrin alpha, non-erythrocytic 1;Spectrin alpha, non-erythrocytic 1;Epididymis secretory sperm binding protein;Spectrin alpha, non-erythrocytic 1;Spectrin alpha chain, non-erythrocytic 1	Q13813	1	LTDPVRCNSLEEI	Carbamidomethyl (C)	C	2120	DLTDPVRCNSLEEIK	1	1	1	1	1	1	277725	249539	353865	96764.2	124858	77519.3	0.00469237	2.94553	1.55853	0.0414069	Up
Q14202_C498_M1	A6NHB5;Q14202	ZMYM3	Zinc finger MYM-type containing 3;Zinc finger MYM-type protein 3	Q14202	1	NTRVYPCVWCKTL	Carbamidomethyl (C)	C	498	KNTRVYPCVWCKTLC	0.87967	0.825693	0.0551342	0.5	0.209281	0.5	89976.4	113529	80473.4	61302.2	34692.6	63801.9	0.0377534	1.77713	0.829548	0.136536	Up
Q14204_C2712_M1	Q14204	DYNC1H1	Cytoplasmic dynein 1 heavy chain 1	Q14204	1	IQFVGACNPPTDP	Carbamidomethyl (C)	C	2712	RIQFVGACNPPTDPG	1	1	1	1			15759.5	29462	24285.8	11473.7	5479.02	3195.32	0.0248133	3.44983	1.78653	0.106743	Up
Q14222_C176_M1	Q14222	EEF1A	EEF1A protein (Fragment)	Q14222	1	VPSKPMCVESFSD	Carbamidomethyl (C)	C	176	MVPSKPMCVESFSDY	1	1	1		1	1	13631.2	25962.4	16267.8	7001.94	4828.18	5750.04	0.0283945	3.17753	1.66791	0.113666	Up
Q14315_C712_M1	Q14315	FLNC	Filamin-C	Q14315	1	AQDADGCPIDIKV	Carbamidomethyl (C)	C	712	YAQDADGCPIDIKVI							144534	175550	227693	98611.7	121465	113018	0.0466845	1.64451	0.717658	0.153591	Up
Q14651_C166_M1	Q14651	PLS1	Plastin-1	Q14651	1	ADGILLCKMINLS	Carbamidomethyl (C)	C	166	LADGILLCKMINLSE	1	1	1				93424	102912	84182.7	45050.8	50761.7	47804.1	0.00127885	1.95324	0.965872	0.0202709	Up
Q14696_C180_M1	Q14696	MESD	LRP chaperone MESD	Q14696	1	LVGQDRCADVTLE	Carbamidomethyl (C)	C	180	FLVGQDRCADVTLEG	1	1	1	1	1		89301.7	106823	105449	24920.7	14817.7	7640.11	0.000356137	6.3652	2.67021	0.0115412	Up
Q15019_C111_M1	A0A384N6H6;B5MCX3;Q15019	;SEPTIN2;SEPTIN2	Septin;Septin-2;Septin-2	Q15019	1	YGDAINCRDCFKT	Carbamidomethyl (C)	C	111	GYGDAINCRDCFKTI	1	1	1	1	1	1	149133	171130	145050	15366.6	64826.3	78515.6	0.00799259	2.93187	1.55182	0.0595832	Up
Q15046_C496_M1	Q15046	KARS1	Lysine--tRNA ligase	Q15046	1	VMKKEICNAYTEL	Carbamidomethyl (C)	C	496	FVMKKEICNAYTELN	1	1	1	1	1		55505.5	61354.8	25599.3	9807.69	4780.69	5267.97	0.0217188	7.17451	2.84288	0.099423	Up
Q15185_C40_M1	A0A087WYT3;B3KUY2;Q15185	PTGES3	Prostaglandin E synthase 3	Q15185	1	SKLTFSCLGGSDN	Carbamidomethyl (C)	C	40	KSKLTFSCLGGSDNF	1	1	1	1	1	1	92417.3	118457	106467	65535.7	62241.4	51886	0.00587847	1.76631	0.820739	0.0486067	Up
Q15366_C54_M1	A0A384N6B9;Q15366	;PCBP2	Epididymis secretory sperm binding protein;Poly(rC)-binding protein 2	Q15366	1	NISEGNCPERIIT	Carbamidomethyl (C)	C	54	INISEGNCPERIITL	1	1	1	1	1	1	195959	140280	120504	56042.7	94220.2	76119	0.0378478	2.01758	1.01263	0.136536	Up
Q15392_C499_M1	A0A0A0MTI1;B7ZAV4;Q15392;Q3LIE7	DHCR24;;DHCR24;Nbla03646	24-dehydrocholesterol reductase;cDNA, FLJ79318, highly similar to 24-dehydrocholesterol reductase;Delta(24)-sterol reductase;Uncharacterized protein Nbla03646	Q15392	1	LREKLGCQDAFPE	Carbamidomethyl (C)	C	499	KLREKLGCQDAFPEV							85164.6	90689.8	86696.6	44841	31087.2	34587.5	0.000337094	2.37569	1.24835	0.0115412	Up
Q15738_C86_M1	A0A384NPZ7;Q15738	;NSDHL	Epididymis secretory sperm binding protein;Sterol-4-alpha-carboxylate 3-dehydrogenase, decarboxylating	Q15738	1	FFLGDLCSRQDLY	Carbamidomethyl (C)	C	86	RFFLGDLCSRQDLYP	1	1	1	1	1	1	9051.51	9133.39	9680.36	1337.51	4125.74	4912.81	0.00613723	2.68553	1.42521	0.0501403	Up
Q16181_C204_M1	A0A023T695;A0A024RA87;A4GYY8;B4DNE4;B4DPQ6;B4DUD6;E7EPK1;E7ES33;G3V1Q4;Q16181;Q3LIE9;Q8TC62	;SEPTIN7;DKFZp686F17268;;;;SEPTIN7;SEPTIN7;SEPTIN7;SEPTIN7;Nbla02942;SEPT7	Septin;Septin;Septin-7 (Fragment);Septin;Septin;Septin;Septin;Septin;Septin;Septin-7;Septin;Septin	Q16181	1	TLTPEECQQFKKQ	Carbamidomethyl (C)	C	204	DTLTPEECQQFKKQI	1	1	1	1	1	1	24626.3	17542.8	22432.3	7963.77	6630.75	10331.2	0.00495434	2.59175	1.37393	0.0421922	Up
Q16527_C25_M1	A0A024RBB5;Q16527	CSRP2	Cysteine and glycine-rich protein 2, isoform CRA_a;Cysteine and glycine-rich protein 2	Q16527	1	HAEEVQCDGRSFH	Carbamidomethyl (C)	C	25	YHAEEVQCDGRSFHR	1	1	1				50281.3	73959.7	54605.9	36828.9	23767.6	21164.6	0.0208273	2.18743	1.12924	0.0973654	Up
Q16531_C260_M1	A0A7P0Z4B9;B7Z2A1;F5GY55;Q16531	DDB1;;DDB1;DDB1	DNA damage-binding protein 1	Q16531	1	KQSTIVCHNRVDP	Carbamidomethyl (C)	C	260	IKQSTIVCHNRVDPN	1	1	1	1	1		5501.54	4772.14	7153.32	3308.66	3999.28	3895.15	0.0479681	1.55555	0.637429	0.154977	Up
Q16658_C61_M1	A0A384MEG1;Q16658	;FSCN1	Fascin	Q16658	1	AGSAAVCLRSHLG	Carbamidomethyl (C)	C	61	EAGSAAVCLRSHLGR				1			18152.1	17048.2	23362.6	8213.97	11683.3	5800.11	0.0133663	2.27895	1.18837	0.0738366	Up
Q16658_C89_M1	A0A384MEG1;Q16658	;FSCN1	Fascin	Q16658	1	EVPGPDCRFLIVA	Carbamidomethyl (C)	C	89	REVPGPDCRFLIVAH				1	1	1	38742.6	44038.3	42127.7	12703.6	8888.86	9819.12	8.56357e-05	3.97651	1.9915	0.00797536	Up
Q1KLZ0_C285_M1	P60709;Q1KLZ0;Q53G76;Q53GK6	ACTB;PS1TP5BP1;;	Actin, cytoplasmic 1;HCG15971, isoform CRA_a;Beta actin variant (Fragment);Beta actin variant (Fragment)	Q1KLZ0	1	FNSIMKCDVDIRK	Carbamidomethyl (C)	C	285	TFNSIMKCDVDIRKD	1	1	1	1	1	1	53120.9	50942.2	55072.4	22109.9	20185.8	23676.6	3.78307e-05	2.41216	1.27032	0.00516767	Up
Q1KMD3_C518_M1	Q1KMD3	HNRNPUL2	Heterogeneous nuclear ribonucleoprotein U-like protein 2	Q1KMD3	1	VQQASQCLSKLVQ	Carbamidomethyl (C)	C	518	LVQQASQCLSKLVQI	1	1	1				30371.3	30596.1	21822.3	15900.2	13583.6	9581.86	0.0131297	2.11924	1.08355	0.073794	Up
Q1ZYQ1_C347_M1	P0DPH7;P0DPH8;Q1ZYQ1	TUBA3C;TUBA3D;TUBA2	Tubulin alpha-3C chain;Tubulin alpha-3D chain;Tubulin alpha chain	Q1ZYQ1	1	IQFVDWCPTGFKV	Carbamidomethyl (C)	C	347	TIQFVDWCPTGFKVG	1	1	1	1	1	1	102365	122004	122062	10346.8	11855.4	9942.5	9.10802e-05	10.7773	3.42992	0.00797536	Up
Q2TA84_C215_M1	B7Z8G2;Q13451;Q2TA84;Q53GX4	;FKBP5;FKBP5;	peptidylprolyl isomerase;Peptidyl-prolyl cis-trans isomerase FKBP5;peptidylprolyl isomerase;peptidylprolyl isomerase (Fragment)	Q2TA84	1	MQREEQCILYLGP	Carbamidomethyl (C)	C	215	KMQREEQCILYLGPR				1			22927	24300.3	30087.9	9156.63	4200.1	3738.66	0.00199569	4.52257	2.17714	0.0250209	Up
Q32Q12_C285_M1	Q32Q12	NME1-NME2	Nucleoside diphosphate kinase	Q32Q12	1	LVDYKSCAHDWVY	Carbamidomethyl (C)	C	285	ELVDYKSCAHDWVYE	1	1	1	1	1	1	96441.2	109556	100880	45463.9	56060.6	45422.7	0.000522065	2.08835	1.06236	0.0126236	Up
Q3B7A7_C298_M1	P22102;Q3B7A7;Q59HH3	GART;GART;	Trifunctional purine biosynthetic protein adenosine-3;Trifunctional purine biosynthetic protein adenosine-3;Trifunctional purine biosynthetic protein adenosine-3 (Fragment)	Q3B7A7	1	RFGDPECQVILPL	Carbamidomethyl (C)	C	298	CRFGDPECQVILPLL	1	1	1	1	1	1	9996.44	12643.3	11095.2	2242.5	1689.23	695.023	0.000404192	7.29127	2.86617	0.0116976	Up
Q3LIE7_C410_M1	A0A0A0MTI1;B7ZAV4;Q15392;Q3LIE7	DHCR24;;DHCR24;Nbla03646	24-dehydrocholesterol reductase;cDNA, FLJ79318, highly similar to 24-dehydrocholesterol reductase;Delta(24)-sterol reductase;Uncharacterized protein Nbla03646	Q3LIE7	1	LREKLGCQDAFPE	Carbamidomethyl (C)	C	410	KLREKLGCQDAFPEV							85164.6	90689.8	86696.6	44841	31087.2	34587.5	0.000337094	2.37569	1.24835	0.0115412	Up
Q3LIE9_C185_M1	A0A023T695;A0A024RA87;A4GYY8;B4DNE4;B4DPQ6;B4DUD6;E7EPK1;E7ES33;G3V1Q4;Q16181;Q3LIE9;Q8TC62	;SEPTIN7;DKFZp686F17268;;;;SEPTIN7;SEPTIN7;SEPTIN7;SEPTIN7;Nbla02942;SEPT7	Septin;Septin;Septin-7 (Fragment);Septin;Septin;Septin;Septin;Septin;Septin;Septin-7;Septin;Septin	Q3LIE9	1	TLTPEECQQFKKQ	Carbamidomethyl (C)	C	185	DTLTPEECQQFKKQI	1	1	1	1	1	1	24626.3	17542.8	22432.3	7963.77	6630.75	10331.2	0.00495434	2.59175	1.37393	0.0421922	Up
Q3YBR2_C227_M1	Q3YBR2	TBRG1	Transforming growth factor beta regulator 1	Q3YBR2	1	IYASMKCPDQKCL	Carbamidomethyl (C)	C	227	RIYASMKCPDQKCLY	1	1	1	1	1	1	129017	123577	117551	60150	57499.5	55164.9	5.34192e-05	2.14186	1.09887	0.00701641	Up
Q53EP4_C545_M1	P04843;Q53EP4	RPN1;	Dolichyl-diphosphooligosaccharide--protein glycosyltransferase subunit 1;Dolichyl-diphosphooligosaccharide--protein glycosyltransferase subunit 1 (Fragment)	Q53EP4	1	TEGSDLCDRVSEM	Carbamidomethyl (C)	C	545	KTEGSDLCDRVSEMQ	1	1	1	1	1	1	38094.9	35134.3	40673.6	22382.4	5560.67	17414.4	0.0120596	2.51122	1.32839	0.072125	Up
Q53FB0_C223_M1	O00299;Q53FB0;Q5SRT3	CLIC1;;CLIC1	Chloride intracellular channel protein 1;Chloride intracellular channel protein (Fragment);Chloride intracellular channel protein	Q53FB0	1	EEFASTCPDDEEI	Carbamidomethyl (C)	C	223	REEFASTCPDDEEIE	1	1	1	1	1		21343.1	30878.6	27224.1	16855.8	6040.94	16666.9	0.0425141	2.00805	1.00579	0.147098	Up
Q53FB0_C24_M1	O00299;Q53FB0;Q5SRT3	CLIC1;;CLIC1	Chloride intracellular channel protein 1;Chloride intracellular channel protein (Fragment);Chloride intracellular channel protein	Q53FB0	1	GAKIGNCPFSQRL	Carbamidomethyl (C)	C	24	DGAKIGNCPFSQRLF	1	1	1	1	1	1	92813.2	85741.6	82645.8	30725	12908.3	15349.9	0.000442218	4.42839	2.14678	0.0118899	Up
Q53FI1_C336_M1	P13796;Q53FI1;V9HWJ7	LCP1;;HEL-S-37	Plastin-2;L-plastin variant (Fragment);Epididymis secretory protein Li 37	Q53FI1	1	DIQRAECMLQQAE	Carbamidomethyl (C)	C	336	DDIQRAECMLQQAER	1	1	1	1	1	1	40585.3	31741	35433.5	12871.9	26854.3	13467.3	0.0254946	2.02581	1.0185	0.108154	Up
Q53G71_C94_M1	P27797;Q53G71;V9HW88	CALR;;HEL-S-99n	Calreticulin;Calreticulin (Fragment);Calreticulin	Q53G71	1	HEQNIDCGGGYVK	Carbamidomethyl (C)	C	94	KHEQNIDCGGGYVKL	1	1	1	1	1	1	106968	134405	130104	2637.98	37701.9	37641.9	0.00248694	4.76364	2.25206	0.028769	Up
Q53G76_C285_M1	P60709;Q1KLZ0;Q53G76;Q53GK6	ACTB;PS1TP5BP1;;	Actin, cytoplasmic 1;HCG15971, isoform CRA_a;Beta actin variant (Fragment);Beta actin variant (Fragment)	Q53G76	1	FNSIMKCDVDIRK	Carbamidomethyl (C)	C	285	TFNSIMKCDVDIRKD	1	1	1	1	1	1	53120.9	50942.2	55072.4	22109.9	20185.8	23676.6	3.78307e-05	2.41216	1.27032	0.00516767	Up
Q53GK6_C285_M1	P60709;Q1KLZ0;Q53G76;Q53GK6	ACTB;PS1TP5BP1;;	Actin, cytoplasmic 1;HCG15971, isoform CRA_a;Beta actin variant (Fragment);Beta actin variant (Fragment)	Q53GK6	1	FNSIMKCDVDIRK	Carbamidomethyl (C)	C	285	TFNSIMKCDVDIRKD	1	1	1	1	1	1	53120.9	50942.2	55072.4	22109.9	20185.8	23676.6	3.78307e-05	2.41216	1.27032	0.00516767	Up
Q53GL5_C418_M1	P48735;Q53GL5	IDH2;	Isocitrate dehydrogenase [NADP], mitochondrial;Isocitrate dehydrogenase [NADP], mitochondrial (Fragment)	Q53GL5	1	TKDLAGCIHGLSN	Carbamidomethyl (C)	C	418	MTKDLAGCIHGLSNV	1	1	1	1			101778	116702	56609.7	3558.53	3711.91	2446.58	0.00806998	28.3101	4.82325	0.0596515	Up
Q53GX4_C215_M1	B7Z8G2;Q13451;Q2TA84;Q53GX4	;FKBP5;FKBP5;	peptidylprolyl isomerase;Peptidyl-prolyl cis-trans isomerase FKBP5;peptidylprolyl isomerase;peptidylprolyl isomerase (Fragment)	Q53GX4	1	MQREEQCILYLGP	Carbamidomethyl (C)	C	215	KMQREEQCILYLGPR				1			22927	24300.3	30087.9	9156.63	4200.1	3738.66	0.00199569	4.52257	2.17714	0.0250209	Up
Q53GY0_C143_M1	B4DPW9;P13797;Q53GY0	;PLS3;	Plastin-3;Plastin-3;Plastin-3 (Fragment)	Q53GY0	1	LENDPDCRHVIPM	Carbamidomethyl (C)	C	143	ALENDPDCRHVIPMN	1	1	1	1	1	1	57783.2	52703.4	51986.5	30528.8	25888.9	27880.2	0.000326486	1.92737	0.946632	0.0115412	Up
Q53GY0_C463_M1	B4DPW9;P13797;Q53GY0	;PLS3;	Plastin-3;Plastin-3;Plastin-3 (Fragment)	Q53GY0	1	MKKLENCNYAVEL	Carbamidomethyl (C)	C	463	NMKKLENCNYAVELG	1	1	1	1	1	1	38000.5	44642.7	32950.8	12502.8	10893	6250.04	0.00177584	3.89916	1.96316	0.0244043	Up
Q53HM8_C305_M1	B2R657;B2R7L2;B4DHY4;B4DT77;B4DWU2;P20073;Q53HM8	;;;;;ANXA7;	Annexin;Annexin;Annexin;Annexin;Annexin;Annexin A7;Annexin (Fragment)	Q53HM8	1	RLLVSMCQGNRDE	Carbamidomethyl (C)	C	305	ERLLVSMCQGNRDEN	1	1	1				74976.4	82957	78230.6	33107.8	27709.9	19781.7	0.0003268	2.9301	1.55095	0.0115412	Up
Q53HW2_C119_M1	A8K4Z4;F8VWS0;P05388;Q53HW2;Q6NSF2	;RPLP0;RPLP0;;RPLP0	60S acidic ribosomal protein P0;60S acidic ribosomal protein P0;Large ribosomal subunit protein uL10;60S acidic ribosomal protein P0 (Fragment);Large ribosomal subunit protein uL10	Q53HW2	1	AGAIAPCEVTVPA	Carbamidomethyl (C)	C	119	RAGAIAPCEVTVPAQ	1	1	1	1	1	1	16889.2	17882.2	13694.1	12473.6	6971.66	3252.33	0.0441036	2.13528	1.09442	0.14949	Up
Q548N1_C70_M1	Q548N1;Q9UK41	VPS28	Vacuolar protein sorting-associated protein 28 homolog	Q548N1	1	SEYTAACSRLLVQ	Carbamidomethyl (C)	C	70	PSEYTAACSRLLVQY		0.849572	0.538559		0.5		9224.37	12360.8	9382.56	5114.4	1251.74	1846.05	0.00856005	3.77094	1.91492	0.0609132	Up
Q56VL3_C106_M1	Q56VL3	OCIAD2	OCIA domain-containing protein 2	Q56VL3	1	VSYIGVCQSKFHF	Carbamidomethyl (C)	C	106	KVSYIGVCQSKFHFF	1	1	1		1	1	115897	103690	108354	11115.1	16792.7	86957.4	0.0449385	2.85501	1.5135	0.150437	Up
Q56VW8_C262_M1	A0A140VJT0;P63151;Q56VW8	;PPP2R2A;	Serine/threonine-protein phosphatase 2A 55 kDa regulatory subunit B;Serine/threonine-protein phosphatase 2A 55 kDa regulatory subunit B alpha isoform;Serine/threonine-protein phosphatase 2A 55 kDa regulatory subunit B	Q56VW8	1	MRASALCDRHSKL	Carbamidomethyl (C)	C	262	DMRASALCDRHSKLF	1	1	1				34940	45512	64653.3	16884.2	8625.09	15684	0.0187911	3.52255	1.81662	0.0920683	Up
Q597H1_C289_M1	A0A7I2ST14;B3KU62;Q597H1;Q92597	NDRG1;;TRG14;NDRG1	Protein NDRG1 (Fragment);Protein NDRG1;Protein NDRG1;Protein NDRG1	Q597H1	1	LLKMADCGGLPQI	Carbamidomethyl (C)	C	289	TLLKMADCGGLPQIS	1	1	1		1	1	99595.7	117481	80276.3	48123.1	23060.1	38582.2	0.00856304	2.70898	1.43775	0.0609132	Up
Q59EL4_C357_M1	B2R7V4;O43172;Q59EL4;Q5T1M7;Q6IAP9	;PRPF4;;PRPF4;PRPF4	cDNA, FLJ93619, highly similar to Homo sapiens PRP4 pre-mRNA processing factor 4 homolog (yeast) (PRPF4), mRNA;U4/U6 small nuclear ribonucleoprotein Prp4;PRPF4 protein variant (Fragment);60 kDa U4/U6 snRNP-specific spliceosomal protein;PRPF4 protein	Q59EL4	1	RFLGTTCYDRSWR	Carbamidomethyl (C)	C	357	GRFLGTTCYDRSWRL	1	1	1	1	1	1	24759.4	18464	19215.5	7319.99	11483.5	15212.9	0.0350415	1.83556	0.876216	0.128674	Up
Q59G75_C450_M1	A0A804HJN6;A0A804HL54;P41252;Q59G75	IARS1;IARS1;IARS1;	isoleucine--tRNA ligase;isoleucine--tRNA ligase;Isoleucine--tRNA ligase, cytoplasmic;isoleucine--tRNA ligase (Fragment)	Q59G75	1	LRNNDLCYWVPEL	Carbamidomethyl (C)	C	450	LLRNNDLCYWVPELV	1	1	1				102013	127952	107766	22653.6	42180.4	28452	0.00112803	3.62037	1.85614	0.0187914	Up
Q59GB4_C560_M1	A0A1C7CYX9;Q59GB4	DPYSL2;	Dihydropyrimidinase-related protein 2;Dihydropyrimidinase-related protein 2 (Fragment)	Q59GB4	1	LYDGPVCEVSVTP	Carbamidomethyl (C)	C	560	GLYDGPVCEVSVTPK	1	1	1		1		23161.9	27427.4	24280.4	7896.44	5283.67	3814.27	0.000383203	4.40556	2.13932	0.0115412	Up
Q59GX6_C235_M1	A0A0D9SF53;A0A0D9SFB3;A0A0D9SG12;A0A2R8Y4A4;A0A2R8Y5G6;A0A2R8Y645;A0A2R8Y774;A0A2R8YCW1;A0A2R8YF78;A0A2R8YFR4;A0A2R8YFS5;A0A2U3TZJ9;B5BTY4;O00571;Q59GX6	DDX3X;DDX3X;DDX3X;DDX3X;DDX3X;DDX3X;DDX3X;DDX3X;DDX3X;DDX3X;DDX3X;DDX3X;DDX3X;DDX3X;	RNA helicase;RNA helicase;RNA helicase;RNA helicase;RNA helicase;RNA helicase;RNA helicase;RNA helicase;RNA helicase;RNA helicase;RNA helicase;RNA helicase;RNA helicase;ATP-dependent RNA helicase DDX3X;RNA helicase (Fragment)	Q59GX6	1	KRDLMACAQTGSG	Carbamidomethyl (C)	C	235	EKRDLMACAQTGSGK	1	1	1	1	1	1	468652	391040	499114	143476	171578	212358	0.00185706	2.57637	1.36534	0.0244043	Up
Q59GY2_C222_M1	P36578;Q59GY2	RPL4;	Large ribosomal subunit protein uL4;Large ribosomal subunit protein uL4 (Fragment)	Q59GY2	1	IQRRGPCIIYNED	Carbamidomethyl (C)	C	222	RIQRRGPCIIYNEDN	1	1	1	1	1	1	82427.3	110603	114262	47051.6	47650.2	44347.5	0.00516391	2.20995	1.14402	0.043548	Up
Q59H77_C205_M1	B3KX11;P49368;Q59H77	;CCT3;	T-complex protein 1 subunit gamma;T-complex protein 1 subunit gamma;T-complex protein 1 subunit gamma (Fragment)	Q59H77	1	RWSSLACNIALDA	Carbamidomethyl (C)	C	205	SRWSSLACNIALDAV	1	1	1	1			80273.2	99653.3	78025.8	21984.6	12287.5	18927	0.000783302	4.84881	2.27763	0.015028	Up
Q59HH3_C334_M1	P22102;Q3B7A7;Q59HH3	GART;GART;	Trifunctional purine biosynthetic protein adenosine-3;Trifunctional purine biosynthetic protein adenosine-3;Trifunctional purine biosynthetic protein adenosine-3 (Fragment)	Q59HH3	1	RFGDPECQVILPL	Carbamidomethyl (C)	C	334	CRFGDPECQVILPLL	1	1	1	1	1	1	9996.44	12643.3	11095.2	2242.5	1689.23	695.023	0.000404192	7.29127	2.86617	0.0116976	Up
Q5EIC0_C163_M1	Q5EIC0	HLA-B	MHC class I antigen (Fragment)	Q5EIC0	1	AYLEGECVELLRR	Carbamidomethyl (C)	C	163	RAYLEGECVELLRRY	1	1	1				132423	138994	120409	85242.6	83236.3	56321.1	0.00671072	1.743	0.801572	0.05367	Up
Q5JPU2_C289_M1	P08559;Q5JPU2	PDHA1	Pyruvate dehydrogenase E1 component subunit alpha, somatic form, mitochondrial;Pyruvate dehydrogenase E1 component subunit alpha	Q5JPU2	1	DGMDILCVREATR	Carbamidomethyl (C)	C	289	VDGMDILCVREATRF	1	1	1	1	1	1	15710.1	19255.2	15540.5	11238.2	9396.39	5250.04	0.0186867	1.95119	0.964355	0.0920683	Up
Q5JR94_C71_M1	P62241;Q5JR94	RPS8	Small ribosomal subunit protein eS8;40S ribosomal protein S8	Q5JR94	1	FSWGSECCTRKTR	Carbamidomethyl (C)	C	71	NFSWGSECCTRKTRI	0.5	0.5	0.99908	0.5	0.454291	0.5	28306.6	20297.1	16459.9	8286.18	11830.1	10015.6	0.0328464	2.15929	1.11056	0.122859	Up
Q5SRQ3_C109_M1	N0E4C7;P67870;Q5SRQ3;Q5SRQ6	CSNK2B	Casein kinase II subunit beta	Q5SRQ3	1	QGDFGYCPRVYCE	Carbamidomethyl (C)	C	109	QQGDFGYCPRVYCEN	1	1	1	1	1	1	28082.8	29888.2	30449.6	10104.3	20570.5	22959.7	0.0445457	1.64858	0.721221	0.149764	Up
Q5SRQ6_C128_M1	N0E4C7;P67870;Q5SRQ3;Q5SRQ6	CSNK2B	Casein kinase II subunit beta	Q5SRQ6	1	QGDFGYCPRVYCE	Carbamidomethyl (C)	C	128	QQGDFGYCPRVYCEN	1	1	1	1	1	1	28082.8	29888.2	30449.6	10104.3	20570.5	22959.7	0.0445457	1.64858	0.721221	0.149764	Up
Q5SRT3_C223_M1	O00299;Q53FB0;Q5SRT3	CLIC1;;CLIC1	Chloride intracellular channel protein 1;Chloride intracellular channel protein (Fragment);Chloride intracellular channel protein	Q5SRT3	1	EEFASTCPDDEEI	Carbamidomethyl (C)	C	223	REEFASTCPDDEEIE	1	1	1	1	1		21343.1	30878.6	27224.1	16855.8	6040.94	16666.9	0.0425141	2.00805	1.00579	0.147098	Up
Q5SRT3_C24_M1	O00299;Q53FB0;Q5SRT3	CLIC1;;CLIC1	Chloride intracellular channel protein 1;Chloride intracellular channel protein (Fragment);Chloride intracellular channel protein	Q5SRT3	1	GAKIGNCPFSQRL	Carbamidomethyl (C)	C	24	DGAKIGNCPFSQRLF	1	1	1	1	1	1	92813.2	85741.6	82645.8	30725	12908.3	15349.9	0.000442218	4.42839	2.14678	0.0118899	Up
Q5SU16_C12_M1	A0A384NYT8;P07437;Q5SU16	;TUBB;TUBB	Tubulin beta chain (Fragment);Tubulin beta chain;Tubulin beta chain	Q5SU16	1	HIQAGQCGNQIGA	Carbamidomethyl (C)	C	12	VHIQAGQCGNQIGAK	1	1	1	1	1	1	85105.3	84736.9	62922.3	3754.42	7349.02	8435.77	0.000680756	11.9127	3.57443	0.013838	Up
Q5T1M7_C341_M1	B2R7V4;O43172;Q59EL4;Q5T1M7;Q6IAP9	;PRPF4;;PRPF4;PRPF4	cDNA, FLJ93619, highly similar to Homo sapiens PRP4 pre-mRNA processing factor 4 homolog (yeast) (PRPF4), mRNA;U4/U6 small nuclear ribonucleoprotein Prp4;PRPF4 protein variant (Fragment);60 kDa U4/U6 snRNP-specific spliceosomal protein;PRPF4 protein	Q5T1M7	1	RFLGTTCYDRSWR	Carbamidomethyl (C)	C	341	GRFLGTTCYDRSWRL	1	1	1	1	1	1	24759.4	18464	19215.5	7319.99	11483.5	15212.9	0.0350415	1.83556	0.876216	0.128674	Up
Q5T5U6_C71_M1	P49903;Q5T5U6	SEPHS1	Selenide, water dikinase 1;Selenophosphate synthetase 1 (Fragment)	Q5T5U6	1	GIGMDTCVIPLRH	Carbamidomethyl (C)	C	71	LGIGMDTCVIPLRHG	1	1	1	1			8744.05	10235.9	7018.36	6600.06	5390.78	4275.59	0.0473857	1.59828	0.676518	0.154217	Up
Q5T765_C39_M1	A0A7P0T855;O14879;Q5T765	IFIT3	Interferon induced protein with tetratricopeptide repeats 3;Interferon-induced protein with tetratricopeptide repeats 3;Interferon-induced protein with tetratricopeptide repeats 3, isoform CRA_a	Q5T765	1	DLEDRVCNQIEFL	Carbamidomethyl (C)	C	39	RDLEDRVCNQIEFLN			1				41149.8	28101.9	40397.1	26736.7	20804.8	13468.9	0.0469144	1.79722	0.845765	0.153903	Up
Q5U0I7_C251_M1	A0A140VJS0;B3KRM2;P62714;Q5U0I7;Q8WZ56	;;PPP2CB;;	Serine/threonine-protein phosphatase;Serine/threonine-protein phosphatase;Serine/threonine-protein phosphatase 2A catalytic subunit beta isoform;Serine/threonine-protein phosphatase;Serine/threonine-protein phosphatase	Q5U0I7	1	MEGYNWCHDRNVV	Carbamidomethyl (C)	C	251	VMEGYNWCHDRNVVT	1	1	1				95190.4	145619	102312	67047.6	59454.7	57947.2	0.0298149	1.86025	0.895496	0.116036	Up
Q5U0I7_C266_M1	A0A140VJS0;B3KRM2;P62714;Q5U0I7;Q8WZ56	;;PPP2CB;;	Serine/threonine-protein phosphatase;Serine/threonine-protein phosphatase;Serine/threonine-protein phosphatase 2A catalytic subunit beta isoform;Serine/threonine-protein phosphatase;Serine/threonine-protein phosphatase	Q5U0I7	1	FSAPNYCYRCGNQ	Carbamidomethyl (C)	C	266	IFSAPNYCYRCGNQA	1	1	1	1		1	12140.4	13527.7	9617.65	2630.15	3930.29	6876.98	0.0127929	2.62593	1.39283	0.0734247	Up
Q658V6_C685_M1	A0A384MR29;P20648;Q658V6	;ATP4A;DKFZp666G172	Sodium/potassium-transporting ATPase subunit alpha;Potassium-transporting ATPase alpha chain 1;Sodium/potassium-transporting ATPase subunit alpha (Fragment)	Q658V6	1	LVIVESCQRLGAI	Carbamidomethyl (C)	C	685	KLVIVESCQRLGAIV	1	1	1	1	1		30718.1	27252.4	27819.7	4518.5	10223.6	4362.78	0.000546398	4.4905	2.16688	0.0127805	Up
Q6FHF5_C162_M1	P12004;Q6FHF5;Q6FI35	PCNA	Proliferating cell nuclear antigen;Proliferating cell nuclear antigen (Fragment);Proliferating cell nuclear antigen	Q6FHF5	1	DAVVISCAKDGVK	Carbamidomethyl (C)	C	162	GDAVVISCAKDGVKF	1	1	1	1	1	1	188054	228572	229889	20523.4	7831.4	8686.05	0.000143666	17.4541	4.12549	0.00908556	Up
Q6FHV6_C357_M1	P09104;Q6FHV6	ENO2	Gamma-enolase;phosphopyruvate hydratase	Q6FHV6	1	TEAIQACKLAQEN	Carbamidomethyl (C)	C	357	VTEAIQACKLAQENG	1	1	1	1	1	1	298737	266402	352462	43568.2	91896.6	55308.4	0.00112411	4.80991	2.26601	0.0187914	Up
Q6FHZ0_C93_M1	A0A024R4K3;P40926;Q0QF37;Q6FHZ0;Q75MT9	;MDH2;MDH2;MDH2;MDH2	Malate dehydrogenase;Malate dehydrogenase, mitochondrial;Malate dehydrogenase (Fragment);Malate dehydrogenase;Malate dehydrogenase (Fragment)	Q6FHZ0	1	PDCLKGCDVVVIP	Carbamidomethyl (C)	C	93	LPDCLKGCDVVVIPA	1	1	1	1	1	1	87362.6	111263	114859	65868.3	61320.9	70368.3	0.012784	1.5868	0.666121	0.0734247	Up
Q6FI35_C162_M1	P12004;Q6FHF5;Q6FI35	PCNA	Proliferating cell nuclear antigen;Proliferating cell nuclear antigen (Fragment);Proliferating cell nuclear antigen	Q6FI35	1	DAVVISCAKDGVK	Carbamidomethyl (C)	C	162	GDAVVISCAKDGVKF	1	1	1	1	1	1	188054	228572	229889	20523.4	7831.4	8686.05	0.000143666	17.4541	4.12549	0.00908556	Up
Q6FIB4_C50_M1	A0A087WY82;B7Z5W1;Q6FIB4;Q9Y5B2;Q9Y624	F11R;;F11R;;F11R	Junctional adhesion molecule A	Q6FIB4	1	NPVKLSCAYSGFS	Carbamidomethyl (C)	C	50	NNPVKLSCAYSGFSS	1	1	1				196327	172764	242134	6463.43	6644.58	5714.68	0.000633486	32.4728	5.02116	0.013437	Up
Q6FIC5_C35_M1	Q6FIC5;Q9Y696	CLIC4	Chloride intracellular channel protein;Chloride intracellular channel protein 4	Q6FIC5	1	GESIGNCPFSQRL	Carbamidomethyl (C)	C	35	DGESIGNCPFSQRLF	1	1	1	1	1	1	124246	141093	38603	9291.16	13971.4	7224.21	0.045605	9.96967	3.31755	0.151249	Up
Q6GSK2_C152_M1	B4DDI9;P22570;Q6GSK2	;FDXR;FDXR	NADPH:adrenodoxin oxidoreductase, mitochondrial;NADPH:adrenodoxin oxidoreductase, mitochondrial;NADPH:adrenodoxin oxidoreductase, mitochondrial	Q6GSK2	1	EELPGVCSARAFV	Carbamidomethyl (C)	C	152	GEELPGVCSARAFVG	1	1	1			1	78693.6	79392.4	67153.8	31221	26307.3	44484.9	0.00363569	2.20794	1.1427	0.036625	Up
Q6IAP9_C341_M1	B2R7V4;O43172;Q59EL4;Q5T1M7;Q6IAP9	;PRPF4;;PRPF4;PRPF4	cDNA, FLJ93619, highly similar to Homo sapiens PRP4 pre-mRNA processing factor 4 homolog (yeast) (PRPF4), mRNA;U4/U6 small nuclear ribonucleoprotein Prp4;PRPF4 protein variant (Fragment);60 kDa U4/U6 snRNP-specific spliceosomal protein;PRPF4 protein	Q6IAP9	1	RFLGTTCYDRSWR	Carbamidomethyl (C)	C	341	GRFLGTTCYDRSWRL	1	1	1	1	1	1	24759.4	18464	19215.5	7319.99	11483.5	15212.9	0.0350415	1.83556	0.876216	0.128674	Up
Q6LAP8_C269_M1	D9HTE9;P53007;Q6LAP8	SLC25A1;SLC25A1;	Citrate transport protein;Tricarboxylate transport protein, mitochondrial;Citrate transport protein (Fragment)	Q6LAP8	1	YRNTWDCGLQILK	Carbamidomethyl (C)	C	269	KYRNTWDCGLQILKK	1	1	1				51466.4	88501.6	80933.1	31137.3	22251.3	23047.6	0.0144451	2.89001	1.53107	0.0770781	Up
Q6LET6_C50_M1	P10620;Q6LET6	MGST1	Microsomal glutathione S-transferase 1;Microsomal glutathione S-transferase 1 (Fragment)	Q6LET6	1	FANPEDCVAFGKG	Carbamidomethyl (C)	C	50	VFANPEDCVAFGKGE	1	1	1	1	1	1	77781.3	115492	115668	15295.2	16826.3	75748.5	0.0466061	2.86401	1.51804	0.153481	Up
Q6LEU2_C213_M1	A3KLL5;P05026;Q6LEU2	ATP1B1	Sodium/potassium-transporting ATPase subunit beta;Sodium/potassium-transporting ATPase subunit beta-1;Sodium/potassium-transporting ATPase subunit beta (Fragment)	Q6LEU2	1	NVLPVQCTGKRDE	Carbamidomethyl (C)	C	213	PNVLPVQCTGKRDED	1	1	1			1	141571	136270	136491	59063.6	49370	35287.7	0.000223066	2.88289	1.52751	0.0115412	Up
Q6MZV5_C482_M1	B0YIW5;B0YIW6;P48444;Q6MZV5	ARCN1;ARCN1;ARCN1;DKFZp686M09245	Coatomer subunit delta	Q6MZV5	1	RNTLEWCLPVIDA	Carbamidomethyl (C)	C	482	RRNTLEWCLPVIDAK	1	1	1	1			15291.6	25070.6	26249.3	5915.2	3694.96	2389.61	0.00735534	5.55107	2.47276	0.0564986	Up
Q6NSF2_C118_M1	A8K4Z4;F8VWS0;P05388;Q53HW2;Q6NSF2	;RPLP0;RPLP0;;RPLP0	60S acidic ribosomal protein P0;60S acidic ribosomal protein P0;Large ribosomal subunit protein uL10;60S acidic ribosomal protein P0 (Fragment);Large ribosomal subunit protein uL10	Q6NSF2	1	AGAIAPCEVTVPA	Carbamidomethyl (C)	C	118	RAGAIAPCEVTVPAQ	1	1	1	1	1	1	16889.2	17882.2	13694.1	12473.6	6971.66	3252.33	0.0441036	2.13528	1.09442	0.14949	Up
Q6NUK1_C330_M1	B7ZB41;Q6NUK1	;SLC25A24	cDNA, FLJ79405, highly similar to Homo sapiens solute carrier family 25, member 24, transcript variant 1, mRNA;Mitochondrial adenyl nucleotide antiporter SLC25A24	Q6NUK1	1	YSGIYDCAKKILK	Carbamidomethyl (C)	C	330	QYSGIYDCAKKILKH	1	1	1	1	1	1	42715.1	37673.6	34784.9	12569.3	11133.6	14184	0.000484174	3.03993	1.60404	0.0121466	Up
Q6NYC8_C611_M1	A0A024RCJ8;A0A0G2JHC2;A0A1U9X8C1;A0A1U9X8C7;A0A1U9X8D1;A0A1U9X8D3;Q6NYC8	;PPP1R18;;;;;PPP1R18	PPP1R18;PPP1R18;PPP1R18;PPP1R18;PPP1R18;PPP1R18;Phostensin	Q6NYC8	1	LIVDESCRR____	Carbamidomethyl (C)	C	611	ALIVDESCRR_____	1	1	1				27716.7	36695.5	25559.7	14479.1	8993.47	13456.3	0.00966728	2.43636	1.28473	0.0649877	Up
Q6P1N9_C113_M1	A0A0D9SGD3;E5RG17;E5RGF2;Q6P1N9	TATDN1	Deoxyribonuclease TATDN1;Deoxyribonuclease TATDN1 (Fragment);Deoxyribonuclease TATDN1;Deoxyribonuclease TATDN1	Q6P1N9	1	VVAIGECGLDFDR	Carbamidomethyl (C)	C	113	KVVAIGECGLDFDRL	1	1	1				426904	542594	448494	352368	238843	205098	0.0220133	1.7807	0.832447	0.0998345	Up
Q6P2Q9_C1896_M1	A0A994J491;A0A994J6E8;Q6P2Q9	PRPF8	Pre-mRNA processing factor 8;Pre-mRNA processing factor 8;Pre-mRNA-processing-splicing factor 8	Q6P2Q9	1	QLPFQACLKVEKF	Carbamidomethyl (C)	C	1896	LQLPFQACLKVEKFG	1	1	1	1			26157.7	16534.4	16657.4	6318.21	4447.77	2934.41	0.010311	4.33195	2.11502	0.0668162	Up
Q6P587_C129_M1	Q6P587	FAHD1	Acylpyruvase FAHD1, mitochondrial	Q6P587	1	KSFTASCPVSAFV	Carbamidomethyl (C)	C	129	AKSFTASCPVSAFVP	1	1	1		1		63438.8	54201.5	76818.9	6943.11	5897.84	4298.51	0.000865237	11.3457	3.50407	0.0159406	Up
Q6WCQ1_C724_M1	B9EGI2;Q6WCQ1	MPRIP	Myosin phosphatase Rho interacting protein;Myosin phosphatase Rho-interacting protein	Q6WCQ1	1	YVLQATCERGFAA	Carbamidomethyl (C)	C	724	GYVLQATCERGFAAM	1	1	1				251084	258905	275769	35945.7	101834	91775.6	0.00103904	3.42296	1.77524	0.0180119	Up
Q6ZNJ1_C89_M1	A0A494C1V1;Q6ZNJ1	NBEAL2	Neurobeachin like 2;Neurobeachin-like protein 2	Q6ZNJ1	1	KLFIILCRNLENI	Carbamidomethyl (C)	C	89	LKLFIILCRNLENIE	1	1	1	1	1	1	13957.2	10623.7	17979.2	1674.2	1589.8	793.924	0.00392155	10.4881	3.39069	0.0375129	Up
Q75MT9_C71_M1	A0A024R4K3;P40926;Q0QF37;Q6FHZ0;Q75MT9	;MDH2;MDH2;MDH2;MDH2	Malate dehydrogenase;Malate dehydrogenase, mitochondrial;Malate dehydrogenase (Fragment);Malate dehydrogenase;Malate dehydrogenase (Fragment)	Q75MT9	1	PDCLKGCDVVVIP	Carbamidomethyl (C)	C	71	LPDCLKGCDVVVIPA	1	1	1	1	1	1	87362.6	111263	114859	65868.3	61320.9	70368.3	0.012784	1.5868	0.666121	0.0734247	Up
Q86X55_C193_M1	A0AA34QVH5;Q86X55	CARM1	Coactivator associated arginine methyltransferase 1;Histone-arginine methyltransferase CARM1	Q86X55	1	IVLDVGCGSGILS	Carbamidomethyl (C)	C	193	KIVLDVGCGSGILSF				1		1	22131.8	21816.8	20759.6	1640.4	2001.52	666.807	3.9814e-06	15.018	3.90862	0.00300967	Up
Q86YI5_C291_M1	A0A7P0TAG1;A0A7P0TAX2;A0A7P0TBE2;B4DJX1;P10515;Q86YI5	DLAT;DLAT;DLAT;;DLAT;DLAT	Dihydrolipoamide acetyltransferase component of pyruvate dehydrogenase complex;Acetyltransferase component of pyruvate dehydrogenase complex;Acetyltransferase component of pyruvate dehydrogenase complex;Acetyltransferase component of pyruvate dehydrogenase complex;Dihydrolipoyllysine-residue acetyltransferase component of pyruvate dehydrogenase complex, mitochondrial;Acetyltransferase component o…	Q86YI5	1	PLGTPLCIIVEKE	Carbamidomethyl (C)	C	291	VPLGTPLCIIVEKEA	1	1	1	1	1	1	35200.1	86595.8	66023.3	15809.4	8357.01	15350.1	0.0308556	4.75293	2.24882	0.117998	Up
Q8IV48_C314_M1	Q8IV48	ERI1	3'-5' exoribonuclease 1	Q8IV48	1	RMLQDGCELRINE	Carbamidomethyl (C)	C	314	VRMLQDGCELRINEK	1	1	1	1	1		15997.8	10248.1	11621.2	5782.79	6775.58	4596.77	0.0200679	2.20734	1.14231	0.0949197	Up
Q8IZ03_C140_M1	A0A7P0T8B3;A0A7P0TAT2;B4DTZ5;P09913;Q8IZ03	IFIT2;IFIT2;;IFIT2;IFIT2	Interferon induced protein with tetratricopeptide repeats 2 (Fragment);Interferon induced protein with tetratricopeptide repeats 2;cDNA FLJ60157, highly similar to Interferon-induced protein with tetratricopeptide repeats 2;Interferon-induced protein with tetratricopeptide repeats 2;Interferon-induced protein with tetratricopeptide repeats 2	Q8IZ03	1	ESPELDCEEGWTR	Carbamidomethyl (C)	C	140	IESPELDCEEGWTRL							86672.2	84766.5	57182.2	29825	23162	36826.6	0.0109342	2.5455	1.34795	0.0677918	Up
Q8N1F7_C397_M1	Q8N1F7	NUP93	Nuclear pore complex protein Nup93	Q8N1F7	1	YCIIGRCDVTDNQ	Carbamidomethyl (C)	C	397	VYCIIGRCDVTDNQS	1	1		1		1	6149.41	7035.1	4769.84	2045.01	1295.65	2139.45	0.00426581	3.27628	1.71206	0.0399873	Up
Q8N201_C1755_M1	A4D212;A4D213;Q8N201	DKFZP586J0619;DKFZP586J0619;INTS1	DKFZP586J0619 protein;DKFZP586J0619 protein;Integrator complex subunit 1	Q8N201	1	DGDTAACSLIQAR	Carbamidomethyl (C)	C	1755	QDGDTAACSLIQARL	1	1	1	1	1	1	130253	134582	148313	89501.5	81940.7	91608.8	0.00126892	1.5706	0.651316	0.0202709	Up
Q8NB01_C71_M1	B3KME2;O75718;Q8NB01	;CRTAP;	cDNA FLJ10772 fis, clone NT2RP4000243, highly similar to Cartilage-associated protein;Cartilage-associated protein;cDNA FLJ34453 fis, clone HLUNG2002429, highly similar to Homo sapiens cartilage-associated protein	Q8NB01	1	RDSEAFCHRNCSA	Carbamidomethyl (C)	C	71	VRDSEAFCHRNCSAA	1	1	1	1		1	9787.63	12552.2	13743.3	5298.3	2383.64	6494.6	0.012491	2.54527	1.34782	0.0734247	Up
Q8NDH3_C284_M1	Q8NDH3	NPEPL1	Probable aminopeptidase NPEPL1	Q8NDH3	1	PGMKRDCGGAAAV	Carbamidomethyl (C)	C	284	MPGMKRDCGGAAAVL							19074.7	23860	26701	3240.29	2279.69	6321.49	0.00161426	5.88067	2.55598	0.0242347	Up
Q8TC62_C184_M1	A0A023T695;A0A024RA87;A4GYY8;B4DNE4;B4DPQ6;B4DUD6;E7EPK1;E7ES33;G3V1Q4;Q16181;Q3LIE9;Q8TC62	;SEPTIN7;DKFZp686F17268;;;;SEPTIN7;SEPTIN7;SEPTIN7;SEPTIN7;Nbla02942;SEPT7	Septin;Septin;Septin-7 (Fragment);Septin;Septin;Septin;Septin;Septin;Septin;Septin-7;Septin;Septin	Q8TC62	1	TLTPEECQQFKKQ	Carbamidomethyl (C)	C	184	DTLTPEECQQFKKQI	1	1	1	1	1	1	24626.3	17542.8	22432.3	7963.77	6630.75	10331.2	0.00495434	2.59175	1.37393	0.0421922	Up
Q8WX93_C1022_M1	Q8WX93	PALLD	Palladin	Q8WX93	1	MPVTFTCRVAGNP	Carbamidomethyl (C)	C	1022	GMPVTFTCRVAGNPK	1	1	1				29524.8	28300.5	20582.5	19012.2	16954.4	15738.6	0.0395732	1.51644	0.600687	0.140627	Up
Q8WYI2_C185_M1	Q8WYI2;Q9HB07	MST024;MYG1	C12orf10 protein;MYG1 exonuclease	Q8WYI2	1	VSGIPGCIFVHAS	Carbamidomethyl (C)	C	185	QVSGIPGCIFVHASG				1	1		18010.7	15159.2	13758	6289.1	1314.21	5824.24	0.00523591	3.4949	1.80525	0.0439328	Up
Q8WZ56_C251_M1	A0A140VJS0;B3KRM2;P62714;Q5U0I7;Q8WZ56	;;PPP2CB;;	Serine/threonine-protein phosphatase;Serine/threonine-protein phosphatase;Serine/threonine-protein phosphatase 2A catalytic subunit beta isoform;Serine/threonine-protein phosphatase;Serine/threonine-protein phosphatase	Q8WZ56	1	MEGYNWCHDRNVV	Carbamidomethyl (C)	C	251	VMEGYNWCHDRNVVT	1	1	1				95190.4	145619	102312	67047.6	59454.7	57947.2	0.0298149	1.86025	0.895496	0.116036	Up
Q8WZ56_C266_M1	A0A140VJS0;B3KRM2;P62714;Q5U0I7;Q8WZ56	;;PPP2CB;;	Serine/threonine-protein phosphatase;Serine/threonine-protein phosphatase;Serine/threonine-protein phosphatase 2A catalytic subunit beta isoform;Serine/threonine-protein phosphatase;Serine/threonine-protein phosphatase	Q8WZ56	1	FSAPNYCYRCGNQ	Carbamidomethyl (C)	C	266	IFSAPNYCYRCGNQA	1	1	1	1		1	12140.4	13527.7	9617.65	2630.15	3930.29	6876.98	0.0127929	2.62593	1.39283	0.0734247	Up
Q92520_C86_M1	Q92520	FAM3C	Protein FAM3C	Q92520	1	VVGPKICLEDNVL	Carbamidomethyl (C)	C	86	NVVGPKICLEDNVLM	1	1	1	1			10980.2	14505.4	13338.6	5269.5	2296.45	2146.41	0.0026084	3.9974	1.99906	0.0296922	Up
Q92597_C289_M1	A0A7I2ST14;B3KU62;Q597H1;Q92597	NDRG1;;TRG14;NDRG1	Protein NDRG1 (Fragment);Protein NDRG1;Protein NDRG1;Protein NDRG1	Q92597	1	LLKMADCGGLPQI	Carbamidomethyl (C)	C	289	TLLKMADCGGLPQIS	1	1	1		1	1	99595.7	117481	80276.3	48123.1	23060.1	38582.2	0.00856304	2.70898	1.43775	0.0609132	Up
Q92973_C103_M1	Q92973	TNPO1	Transportin-1	Q92973	1	DFIKSECLNNIGD	Carbamidomethyl (C)	C	103	TDFIKSECLNNIGDS	1	1	1	1		1	14219	14972.6	13555.3	2286.67	2782.42	2753.81	1.21106e-05	5.46433	2.45005	0.00375978	Up
Q969N2_C272_M1	A0A1W2PNP0;A0A1W2PP57;A0A1W2PPC3;A0A1W2PPR6;A0A1W2PPS0;A0A1W2PR73;Q969N2	PIGT	Phosphatidylinositol glycan anchor biosynthesis class T (Fragment);Phosphatidylinositol glycan anchor biosynthesis class T;Phosphatidylinositol glycan anchor biosynthesis class T;Phosphatidylinositol glycan anchor biosynthesis class T;Phosphatidylinositol glycan anchor biosynthesis class T;Phosphatidylinositol glycan anchor biosynthesis class T;GPI transamidase component PIG-T	Q969N2	1	RTLTEPCPLASES	Carbamidomethyl (C)	C	272	SRTLTEPCPLASESR	1	1	1	1	1	1	71844.8	66482.4	57005	16931.5	12993.8	15827.7	0.00037547	4.26928	2.09399	0.0115412	Up
Q96AG4_C48_M1	Q96AG4	LRRC59	Leucine-rich repeat-containing protein 59	Q96AG4	1	TILDLSCNKLTTL	Carbamidomethyl (C)	C	48	ATILDLSCNKLTTLP	1	1	1	1	1	1	37498.2	44852.5	55478.9	20579.5	16824.9	14524.8	0.0065287	2.65418	1.40827	0.05246	Up
Q96AY3_C222_M1	Q96AY3	FKBP10	Peptidyl-prolyl cis-trans isomerase FKBP10	Q96AY3	1	QGLLGMCPGERRK	Carbamidomethyl (C)	C	222	DQGLLGMCPGERRKI	1	1	1	1		1	42794.5	55787.4	53493.1	14382.7	11662.7	24589.1	0.00382701	3.00339	1.58659	0.0370233	Up
Q96C71_C140_M1	B3KX51;P04899;Q96C71	;GNAI2;GNAI2	Guanine nucleotide-binding protein G(i) subunit alpha-2	Q96C71	1	DHGVQACFGRSRE	Carbamidomethyl (C)	C	140	ADHGVQACFGRSREY	1	1	1	1			6622.69	5222.97	11971.9	965.817	1125.78	1037.04	0.0284986	7.61276	2.92842	0.113666	Up
Q96IR1_C161_M1	B2R491;P62701;Q96IR1	RPS4X	40S ribosomal protein S4;Small ribosomal subunit protein eS4, X isoform;RPS4X protein (Fragment)	Q96IR1	1	FDTGNLCMVTGGA	Carbamidomethyl (C)	C	161	KFDTGNLCMVTGGAN	1	1	1	1	1	1	17436.6	19071.4	22778.6	8702.85	5086.69	12546.1	0.0147108	2.25119	1.17069	0.0775269	Up
Q96JZ5_C384_M1	A0A024QYS2;Q96JZ5;Q9HD45	;SMBP;TM9SF3	Transmembrane 9 superfamily member;Transmembrane 9 superfamily member;Transmembrane 9 superfamily member 3	Q96JZ5	1	GQPNFPCRVNAVP	Carbamidomethyl (C)	C	384	SGQPNFPCRVNAVPR	1	1	1	1		1	42683.5	48426.5	46586.9	27696.2	17979.8	22692.5	0.0021313	2.01404	1.01009	0.0257187	Up
Q96T51_C351_M1	Q96T51	RUFY1	RUN and FYVE domain-containing protein 1	Q96T51	1	AATDRICSLQEEQ	Carbamidomethyl (C)	C	351	SAATDRICSLQEEQQ			1			1	47827.4	49493.4	56975.9	19288.1	17550.3	15174.3	0.000367138	2.96652	1.56877	0.0115412	Up
Q99714_C214_M1	A0A0S2Z410;Q99714	HSD17B10	Epididymis secretory sperm binding protein (Fragment);3-hydroxyacyl-CoA dehydrogenase type-2	Q99714	1	SLPEKVCNFLASQ	Carbamidomethyl (C)	C	214	TSLPEKVCNFLASQV	1	1	1	1	1		27831.5	33026.6	36574.9	21139.2	12128.8	4187.84	0.0222662	2.60127	1.37922	0.100431	Up
Q99798_C385_M1	A0A0K0K1H7;A0A7I2V3F1;A0A7I2V3U0;A0A7I2V586;A2A274;B2RBW5;B4DZ08;Q99798	HEL-S-284;ACO2;ACO2;ACO2;ACO2;;;ACO2	Aconitate hydratase, mitochondrial;Aconitate hydratase, mitochondrial;Aconitate hydratase, mitochondrial;Aconitate hydratase, mitochondrial;Aconitase 2;Aconitate hydratase, mitochondrial;Aconitate hydratase, mitochondrial;Aconitate hydratase, mitochondrial	Q99798	1	VGLIGSCTNSSYE	Carbamidomethyl (C)	C	385	RVGLIGSCTNSSYED	1	1	1	1		1	7051.84	7923.69	4295.35	3352.39	2008.54	1147.78	0.0284222	2.96078	1.56598	0.113666	Up
Q9BQ69_C199_M1	Q9BQ69	MACROD1	ADP-ribose glycohydrolase MACROD1	Q9BQ69	1	PLLTDECRTLQSC	Carbamidomethyl (C)	C	199	GPLLTDECRTLQSCK	1	1	1	1			46322.1	42619	36388.9	16132.3	12603.6	34315.8	0.047144	1.98773	0.991124	0.154217	Up
Q9BW60_C93_M1	A0A3G2LMN0;Q9BW60	ELOVL1	Elongation of very long chain fatty acids protein 1;Very long chain fatty acid elongase 1	Q9BW60	1	STYTWRCDPVDYS	Carbamidomethyl (C)	C	93	LSTYTWRCDPVDYSN	1	1	1	1	1		36513.7	41280.5	47209.9	14872.6	21790.4	33627.2	0.0441246	1.7784	0.830579	0.14949	Up
Q9BXJ9_C238_M1	B2RBE5;Q9BXJ9	;NAA15	cDNA, FLJ95468, highly similar to Homo sapiens transcriptional coactivator tubedown-100 (TBDN100),transcript variant 1, mRNA;N-alpha-acetyltransferase 15, NatA auxiliary subunit	Q9BXJ9	1	ELLLQLCRLEDAA	Carbamidomethyl (C)	C	238	GELLLQLCRLEDAAD	1	1	1	1	1	1	458663	542944	500733	194723	251117	233285	0.000741035	2.21217	1.14546	0.0145439	Up
Q9BY44_C306_M1	Q9BY44	EIF2A	Eukaryotic translation initiation factor 2A	Q9BY44	1	TIFNLKCDPVFDF	Carbamidomethyl (C)	C	306	ATIFNLKCDPVFDFG	1	1	1	1	1	1	58200	45438.3	48784.6	30903.1	17615.7	16108.2	0.00845245	2.3585	1.23787	0.0609132	Up
Q9GZS1_C14_M1	Q9GZS1	POLR1E	DNA-directed RNA polymerase I subunit RPA49	Q9GZS1	1	SARWQYCGAPDGS	Carbamidomethyl (C)	C	14	PSARWQYCGAPDGSQ	1	1	1				116931	100169	69017.9	7276.71	11297.8	19411.5	0.00465083	7.5322	2.91307	0.0414069	Up
Q9H223_C141_M1	A8K9B9;Q9H223	;EHD4	cDNA FLJ77391, highly similar to Homo sapiens EH-domain containing 4 (EHD4), mRNA;EH domain-containing protein 4	Q9H223	1	FLNRFMCSQLPNQ	Carbamidomethyl (C)	C	141	AFLNRFMCSQLPNQV	1	1	1				28544.9	32999.9	53955.9	15807.1	16978.7	9088.64	0.0403766	2.75826	1.46376	0.142004	Up
Q9H3G5_C320_M1	B3KW79;O75225;Q9H3G5	;CPVL;CPVL	Carboxypeptidase;Carboxypeptidase (Fragment);Probable serine carboxypeptidase CPVL	Q9H3G5	1	YYNFLRCTEPEDQ	Carbamidomethyl (C)	C	320	NYYNFLRCTEPEDQL	1	1	1	1	1	1	67847.7	90951.1	78352.1	15122.2	35991.3	40366.9	0.00908627	2.59237	1.37427	0.0625597	Up
Q9H4A4_C181_M1	Q9H4A4	RNPEP	Aminopeptidase B	Q9H4A4	1	NRAFFPCFDTPAV	Carbamidomethyl (C)	C	181	LNRAFFPCFDTPAVK	1	1	1			1	96988	132330	118986	47271.1	20347.6	18312.8	0.00326145	4.05328	2.01909	0.0339569	Up
Q9H4A4_C254_M1	Q9H4A4	RNPEP	Aminopeptidase B	Q9H4A4	1	RVWAEPCLIDAAK	Carbamidomethyl (C)	C	254	SRVWAEPCLIDAAKE	1	1	1	1			40753.8	24096.1	55793.7	13908	8095.09	4542.29	0.0304005	4.54481	2.18422	0.117707	Up
Q9H832_C100_M1	B4DL66;Q9H832	;UBE2Z	Ubiquitin-conjugating enzyme E2 Z	Q9H832	1	ERTAPQCLLRIKR	Carbamidomethyl (C)	C	100	GERTAPQCLLRIKRD	1	1	1				26080.9	22709.4	29114.2	18496.5	13422.3	12262.7	0.013446	1.76329	0.818266	0.0739422	Up
Q9H8Y8_C173_M1	B4DEI4;Q9H8Y8	;GORASP2	cDNA FLJ54595, highly similar to Golgi reassembly-stacking protein 2;Golgi reassembly-stacking protein 2	Q9H8Y8	1	NTDTDNCREVIIT	Carbamidomethyl (C)	C	173	YNTDTDNCREVIITP	1	1	1	1	1	1	64669.2	70373.4	53959.2	6122.53	10468.9	6858.88	0.000381718	8.05968	3.01072	0.0115412	Up
Q9HB07_C340_M1	Q8WYI2;Q9HB07	MST024;MYG1	C12orf10 protein;MYG1 exonuclease	Q9HB07	1	VSGIPGCIFVHAS	Carbamidomethyl (C)	C	340	QVSGIPGCIFVHASG				1	1		18010.7	15159.2	13758	6289.1	1314.21	5824.24	0.00523591	3.4949	1.80525	0.0439328	Up
Q9HD45_C428_M1	A0A024QYS2;Q96JZ5;Q9HD45	;SMBP;TM9SF3	Transmembrane 9 superfamily member;Transmembrane 9 superfamily member;Transmembrane 9 superfamily member 3	Q9HD45	1	GQPNFPCRVNAVP	Carbamidomethyl (C)	C	428	SGQPNFPCRVNAVPR	1	1	1	1		1	42683.5	48426.5	46586.9	27696.2	17979.8	22692.5	0.0021313	2.01404	1.01009	0.0257187	Up
Q9HDC9_C149_M1	Q9HDC9	APMAP	Adipocyte plasma membrane-associated protein	Q9HDC9	1	RDDEPVCGRPLGI	Carbamidomethyl (C)	C	149	TRDDEPVCGRPLGIR	1	1	1	1	1	1	5769.68	6341.59	6266.29	2874.06	3482.38	2693.25	0.000480378	2.03074	1.02201	0.0121466	Up
Q9NRP0_C14_M1	A0A087WUD3;Q9NRP0	OSTC	Oligosaccharyltransferase complex subunit;Oligosaccharyltransferase complex subunit OSTC	Q9NRP0	1	PFLVLECPNLKLK	Carbamidomethyl (C)	C	14	VPFLVLECPNLKLKK	1	1	1	1	1		8769.28	10617	12278.4	4262.24	2113.85	4935.73	0.00685387	2.79926	1.48505	0.0544325	Up
Q9NSE4_C1002_M1	Q9NSE4	IARS2	Isoleucine--tRNA ligase, mitochondrial	Q9NSE4	1	ESSDTLCPRCAEV	Carbamidomethyl (C)	C	1002	AESSDTLCPRCAEVV	1	1	1	1			11203.6	15379	12122.7	9518.39	2312.83	5657.99	0.0440287	2.21309	1.14606	0.14949	Up
Q9NSE4_C91_M1	Q9NSE4	IARS2	Isoleucine--tRNA ligase, mitochondrial	Q9NSE4	1	LEIQQKCGFSELY	Carbamidomethyl (C)	C	91	ELEIQQKCGFSELYS	1	1	1	1			36141.6	36181.3	22962.3	7962.3	3051.4	3094.87	0.00448647	6.75372	2.75568	0.0414069	Up
Q9NZM1_C1425_M1	Q9NZM1	MYOF	Myoferlin	Q9NZM1	1	LLSAPPCRDIVIE	Carbamidomethyl (C)	C	1425	SLLSAPPCRDIVIEM	1	1	1		1		7628.05	13031.4	12587.7	5675.22	6474.44	3800.9	0.0388852	2.08439	1.05962	0.138905	Up
Q9NZM1_C1610_M1	Q9NZM1	MYOF	Myoferlin	Q9NZM1	1	RMYELSCYLPQEK	Carbamidomethyl (C)	C	1610	GRMYELSCYLPQEKD	1		1				24464.9	29796.4	27323	10594.2	8506.04	5551.63	0.000868215	3.30946	1.7266	0.0159406	Up
Q9NZU5_C301_M1	Q9NZU5	LMCD1	LIM and cysteine-rich domains protein 1	Q9NZU5	1	WCGRHYCESLRPR	Carbamidomethyl (C)	C	301	PWCGRHYCESLRPRC	1	1	1			1	138087	70067.5	182139	53289	24849.2	19050.4	0.0463587	4.01584	2.0057	0.153258	Up
Q9UEW8_C82_M1	A0A8V8TKT5;Q9UEW8;X5D2U3;X5D7P8;X5DP03	STK39	non-specific serine/threonine protein kinase;STE20/SPS1-related proline-alanine-rich protein kinase;non-specific serine/threonine protein kinase (Fragment);non-specific serine/threonine protein kinase (Fragment);non-specific serine/threonine protein kinase (Fragment)	Q9UEW8	1	VVQAALCKPRQER	Carbamidomethyl (C)	C	82	AVVQAALCKPRQERV				1	1	1	4576.34	7264.12	5673.16	380.476	548.383	692.256	0.00251887	10.8034	3.43342	0.028769	Up
Q9UI30_C33_M1	Q9UI30	TRMT112	Multifunctional methyltransferase subunit TRM112-like protein	Q9UI30	1	ATEVRICPVEFNP	Carbamidomethyl (C)	C	33	QATEVRICPVEFNPN	1	1	1	1	1	1	272515	285691	323962	26839.8	49626.9	30571.2	0.00010842	8.24164	3.04293	0.00867311	Up
Q9UK41_C70_M1	Q548N1;Q9UK41	VPS28	Vacuolar protein sorting-associated protein 28 homolog	Q9UK41	1	SEYTAACSRLLVQ	Carbamidomethyl (C)	C	70	PSEYTAACSRLLVQY		0.849572	0.538559		0.5		9224.37	12360.8	9382.56	5114.4	1251.74	1846.05	0.00856005	3.77094	1.91492	0.0609132	Up
Q9UQ80_C179_M1	Q9UQ80	PA2G4	Proliferation-associated protein 2G4	Q9UQ80	1	VAHSFNCTPIEGM	Carbamidomethyl (C)	C	179	KVAHSFNCTPIEGML	1	1	1	1			6244.14	9673.65	10514.2	3710.67	6112.95	2667.65	0.0486052	2.11604	1.08137	0.156149	Up
Q9Y263_C193_M1	Q9Y263	PLAA	Phospholipase A-2-activating protein	Q9Y263	1	FSGHEDCVRGLAI	Carbamidomethyl (C)	C	193	TFSGHEDCVRGLAIL	1	1	1	1	1	1	7717.99	8017.5	10385.1	4926.04	5809.41	3942.28	0.0189449	1.77961	0.83156	0.0926888	Up
Q9Y265_C206_M1	A0A384MTR5;B5BUB1;Q9Y265	;RUVBL1;RUVBL1	RuvB-like helicase;RuvB-like helicase (Fragment);RuvB-like 1	Q9Y265	1	VKRQGRCDTYATE	Carbamidomethyl (C)	C	206	AVKRQGRCDTYATEF				1	1	1	12594.8	18285.3	16182.5	6001.39	7971.64	3762.28	0.00898079	2.65361	1.40795	0.0625597	Up
Q9Y3F4_C305_M1	Q9Y3F4	STRAP	Serine-threonine kinase receptor-associated protein	Q9Y3F4	1	TYGLWKCVLPEED	Carbamidomethyl (C)	C	305	KTYGLWKCVLPEEDS	1	1	1	1		1	6340.21	7509.18	8545.94	2952.07	2269.77	1908.16	0.00197308	3.141	1.65123	0.0250209	Up
Q9Y4K0_C231_M1	Q9Y4K0;W6I206;W8QRJ0	LOXL2	Lysyl oxidase homolog 2;Lysyl oxidase homolog;Lysyl oxidase homolog (Fragment)	Q9Y4K0	1	KNSRVVCGMFGFP	Carbamidomethyl (C)	C	231	AKNSRVVCGMFGFPG							66341.3	76988.8	59401.2	26241.4	24939.6	24345.1	0.00118231	2.68426	1.42452	0.0194115	Up
Q9Y5B2_C30_M1	A0A087WY82;B7Z5W1;Q6FIB4;Q9Y5B2;Q9Y624	F11R;;F11R;;F11R	Junctional adhesion molecule A	Q9Y5B2	1	NPVKLSCAYSGFS	Carbamidomethyl (C)	C	30	NNPVKLSCAYSGFSS	1	1	1				196327	172764	242134	6463.43	6644.58	5714.68	0.000633486	32.4728	5.02116	0.013437	Up
Q9Y624_C50_M1	A0A087WY82;B7Z5W1;Q6FIB4;Q9Y5B2;Q9Y624	F11R;;F11R;;F11R	Junctional adhesion molecule A	Q9Y624	1	NPVKLSCAYSGFS	Carbamidomethyl (C)	C	50	NNPVKLSCAYSGFSS	1	1	1				196327	172764	242134	6463.43	6644.58	5714.68	0.000633486	32.4728	5.02116	0.013437	Up
Q9Y696_C35_M1	Q6FIC5;Q9Y696	CLIC4	Chloride intracellular channel protein;Chloride intracellular channel protein 4	Q9Y696	1	GESIGNCPFSQRL	Carbamidomethyl (C)	C	35	DGESIGNCPFSQRLF	1	1	1	1	1	1	124246	141093	38603	9291.16	13971.4	7224.21	0.045605	9.96967	3.31755	0.151249	Up
Q9Y6C9_C79_M1	Q9Y6C9	MTCH2	Mitochondrial carrier homolog 2	Q9Y6C9	1	GLTPRLCSGVLGT	Carbamidomethyl (C)	C	79	TGLTPRLCSGVLGTV	1	1	1	1	1		8094.15	5867.09	8228.76	2472.98	4189.64	3867.47	0.0139012	2.10729	1.07539	0.0753533	Up
Q9Y6K5_C850_M1	A0A7P0T9W6;A0A7P0Z4D0;A8KA84;Q9Y6K5	OAS3;OAS3;;OAS3	2'-5' oligoadenylate synthase;2'-5' oligoadenylate synthase;2'-5' oligoadenylate synthase;2'-5'-oligoadenylate synthase 3	Q9Y6K5	1	RAQLEACQQERQF	Carbamidomethyl (C)	C	850	IRAQLEACQQERQFE	1	1	1			1	41380.9	42600	37411.7	30648.9	13736.6	9163.52	0.0281602	2.26694	1.18075	0.113666	Up
V9HVZ4_C152_M2	P04406;V9HVZ4	GAPDH;HEL-S-162eP	Glyceraldehyde-3-phosphate dehydrogenase	V9HVZ4	2	IISNASCTTNCLA	Carbamidomethyl (C)	C	152	KIISNASCTTNCLAP	1	1	1	1	1	1	1.05482e+06	786386	1.2202e+06	1013.78	1244.48	3460.62	0.00128808	535.316	9.06425	0.0202709	Up
V9HVZ4_C156_M2	P04406;V9HVZ4	GAPDH;HEL-S-162eP	Glyceraldehyde-3-phosphate dehydrogenase	V9HVZ4	2	ASCTTNCLAPLAK	Carbamidomethyl (C)	C	156	NASCTTNCLAPLAKV	1	1	1	1	1	1	1.05482e+06	786386	1.2202e+06	1013.78	1244.48	3460.62	0.00128808	535.316	9.06425	0.0202709	Up
V9HW37_C429_M1	P48643;V9HW37	CCT5;HEL-S-69	T-complex protein 1 subunit epsilon	V9HW37	1	GAAEISCALAVSQ	Carbamidomethyl (C)	C	429	GGAAEISCALAVSQE				1			18250.9	14449.4	12487.6	4241.53	5458.34	2828.63	0.00420605	3.60681	1.85072	0.0398433	Up
V9HW65_C133_M1	A0A024R5Z7;P07355;V9HW65	ANXA2;ANXA2;HEL-S-270	Annexin;Annexin A2;Annexin	V9HW65	1	SLIEIICSRTNQE	Carbamidomethyl (C)	C	133	DSLIEIICSRTNQEL	1	1	1	1	1		14448.4	14147.7	17847.3	9956.17	10359.2	9590.57	0.0102788	1.55298	0.635042	0.0668162	Up
V9HW74_C152_M1	P09936;V9HW74	UCHL1;HEL-117	Ubiquitin carboxyl-terminal hydrolase isozyme L1;Ubiquitin carboxyl-terminal hydrolase	V9HW74	1	VAQEGQCRVDDKV	Carbamidomethyl (C)	C	152	AVAQEGQCRVDDKVN	1	1	1	1	1	1	73745.9	75666.9	81996.8	916.227	4216.06	843.992	1.03529e-05	38.7214	5.27506	0.00353553	Up
V9HW84_C608_M1	A0A384P5G6;B7Z4V2;P38646;V9HW84	;;HSPA9;HEL-S-124m	Stress-70 protein, mitochondrial;Stress-70 protein, mitochondrial;Stress-70 protein, mitochondrial;Stress-70 protein, mitochondrial	V9HW84	1	QLPADECNKLKEE	Carbamidomethyl (C)	C	608	DQLPADECNKLKEEI	1	1	1	1	1	1	18606.3	24161.5	23903.5	13597.8	13867.7	15778.6	0.0156873	1.54174	0.624562	0.0812928	Up
V9HW88_C105_M1	P27797;Q53G71;V9HW88	CALR;;HEL-S-99n	Calreticulin;Calreticulin (Fragment);Calreticulin	V9HW88	1	HEQNIDCGGGYVK	Carbamidomethyl (C)	C	105	KHEQNIDCGGGYVKL	1	1	1	1	1	1	106968	134405	130104	2637.98	37701.9	37641.9	0.00248694	4.76364	2.25206	0.028769	Up
V9HWA6_C23_M1	P60981;V9HWA6	DSTN;HEL32	Destrin	V9HWA6	1	DMKVRKCSTPEEI	Carbamidomethyl (C)	C	23	YDMKVRKCSTPEEIK	1	1	1	1	1		40031.4	31015.1	40087.1	7367.75	7932.31	4596.77	0.000672762	5.58549	2.48168	0.013838	Up
V9HWB7_C118_M1	P21399;V9HWB7	ACO1;HEL60	Cytoplasmic aconitate hydratase	V9HWB7	1	EKINPVCPADLVI	Carbamidomethyl (C)	C	118	PEKINPVCPADLVID				1	1		10543	17554.2	15084.3	5658.99	730.165	6955.88	0.0236216	3.23577	1.69411	0.10382	Up
V9HWB8_C358_M1	P14618;V9HWB8	PKM;HEL-S-30	Pyruvate kinase PKM;Pyruvate kinase	V9HWB8	1	VLDGADCIMLSGE	Carbamidomethyl (C)	C	358	AVLDGADCIMLSGET	1	1	1	1			13832.8	13201.8	12093.8	2139.86	2230.83	2648.01	3.59749e-05	5.57487	2.47894	0.00516767	Up
V9HWB8_C474_M1	P14618;V9HWB8	PKM;HEL-S-30	Pyruvate kinase PKM;Pyruvate kinase	V9HWB8	1	GIFPVLCKDPVQE	Carbamidomethyl (C)	C	474	RGIFPVLCKDPVQEA	1	1	1	1	1	1	139094	144107	154408	41982.7	56621.1	43344.6	0.000109647	3.08287	1.62427	0.00867311	Up
V9HWB9_C163_M1	P00338;V9HWB9	LDHA;HEL-S-133P	L-lactate dehydrogenase A chain;L-lactate dehydrogenase	V9HWB9	1	RVIGSGCNLDSAR	Carbamidomethyl (C)	C	163	NRVIGSGCNLDSARF	1	1	1	1	1	1	1.36085e+06	1.31555e+06	1.27196e+06	602258	842610	564551	0.00205776	1.96493	0.974476	0.0250974	Up
V9HWC7_C91_M1	P30041;V9HWC7	PRDX6;HEL-S-128m	Peroxiredoxin-6	V9HWC7	1	DINAYNCEEPTEK	Carbamidomethyl (C)	C	91	KDINAYNCEEPTEKL	1	1	1	1	1	1	114429	83963.5	87250.2	45255.8	49478.7	70335	0.0314931	1.73044	0.791141	0.119898	Up
V9HWE1_C328_M1	P08670;V9HWE1	VIM;HEL113	Vimentin	V9HWE1	1	QVQSLTCEVDALK	Carbamidomethyl (C)	C	328	RQVQSLTCEVDALKG	1	1	1	1	1	1	283366	357302	335614	229193	154488	159774	0.0114247	1.79644	0.84514	0.0697946	Up
V9HWE9_C48_M1	P09211;V9HWE9	GSTP1;HEL-S-22	Glutathione S-transferase P;Glutathione S-transferase	V9HWE9	1	GSLKASCLYGQLP	Carbamidomethyl (C)	C	48	EGSLKASCLYGQLPK	1	1	1	1	1	1	263063	300545	258074	95464.7	104993	104335	0.000233417	2.69587	1.43075	0.0115412	Up
V9HWF4_C50_M1	P00558;V9HWF4	PGK1;HEL-S-68p	Phosphoglycerate kinase 1;Phosphoglycerate kinase	V9HWF4	1	VPSIKFCLDNGAK	Carbamidomethyl (C)	C	50	AVPSIKFCLDNGAKS	1	1	1	1	1	1	22412.6	24427.9	19801.2	13438.4	16939.9	8033.7	0.0320754	1.73491	0.794864	0.120484	Up
V9HWF5_C161_M1	A8K486;P62937;V9HWF5	;PPIA;HEL-S-69p	Peptidyl-prolyl cis-trans isomerase;Peptidyl-prolyl cis-trans isomerase A;Peptidyl-prolyl cis-trans isomerase	V9HWF5	1	KITIADCGQLE__	Carbamidomethyl (C)	C	161	KKITIADCGQLE___	1	1	1	1	1	1	312635	340413	523754	170199	193579	138779	0.0299348	2.34163	1.22751	0.116036	Up
V9HWG3_C10_M1	P21980;V9HWG3	TGM2;HEL-S-45	Protein-glutamine gamma-glutamyltransferase 2	V9HWG3	1	ELVLERCDLELET	Carbamidomethyl (C)	C	10	EELVLERCDLELETN							34802.3	46387.9	36233.5	11460.3	19787.4	28379.9	0.0341679	1.96928	0.977672	0.126555	Up
V9HWG3_C554_M1	P21980;V9HWG3	TGM2;HEL-S-45	Protein-glutamine gamma-glutamyltransferase 2	V9HWG3	1	YEKYRDCLTESNL	Carbamidomethyl (C)	C	554	LYEKYRDCLTESNLI							68532.8	80736.8	65026.6	36244.9	31315.2	21002.8	0.00305429	2.41971	1.27483	0.0319951	Up
V9HWG9_C192_M1	B2R983;P78417;V9HWG9	;GSTO1;HEL-S-21	Glutathione S-transferase omega;Glutathione S-transferase omega-1;Glutathione S-transferase omega	V9HWG9	1	AMKLNECVDHTPK	Carbamidomethyl (C)	C	192	EAMKLNECVDHTPKL	1	1	1	1	1		12598.7	14099.4	11815.8	5047.35	3546.44	3209.31	0.000528602	3.26303	1.70621	0.0126236	Up
V9HWH7_C434_M1	P31939;V9HWH7	ATIC;HEL-S-70p	Bifunctional purine biosynthesis protein ATIC	V9HWH7	1	TQSNSVCYAKNGQ	Carbamidomethyl (C)	C	434	YTQSNSVCYAKNGQV	1	1	1	1		1	6752.22	7666.16	6002.34	2594.56	3544.49	3607.39	0.00362541	2.0952	1.06709	0.036625	Up
V9HWJ1_C422_M1	A0A2R8Y430;P48637;V9HWJ1	GSS;GSS;HEL-S-64p	Glutathione synthetase	V9HWJ1	1	PARVVQCISELGI	Carbamidomethyl (C)	C	422	SPARVVQCISELGIF				1	1	1	10384.5	11370	10486.1	6680.72	5491.35	4136.17	0.00265881	1.97695	0.983276	0.0299263	Up
V9HWJ7_C336_M1	P13796;Q53FI1;V9HWJ7	LCP1;;HEL-S-37	Plastin-2;L-plastin variant (Fragment);Epididymis secretory protein Li 37	V9HWJ7	1	DIQRAECMLQQAE	Carbamidomethyl (C)	C	336	DDIQRAECMLQQAER	1	1	1	1	1	1	40585.3	31741	35433.5	12871.9	26854.3	13467.3	0.0254946	2.02581	1.0185	0.108154	Up
V9HWK1_C42_M1	P60174;V9HWK1	TPI1;HEL-S-49	Triosephosphate isomerase	V9HWK1	1	ADTEVVCAPPTAY	Carbamidomethyl (C)	C	42	PADTEVVCAPPTAYI	1	1	1	1	1	1	63100.3	69956.3	60063.6	17508.9	8652.4	8226.29	0.000230448	5.61598	2.48954	0.0115412	Up
W6I206_C231_M1	Q9Y4K0;W6I206;W8QRJ0	LOXL2	Lysyl oxidase homolog 2;Lysyl oxidase homolog;Lysyl oxidase homolog (Fragment)	W6I206	1	KNSRVVCGMFGFP	Carbamidomethyl (C)	C	231	AKNSRVVCGMFGFPG							66341.3	76988.8	59401.2	26241.4	24939.6	24345.1	0.00118231	2.68426	1.42452	0.0194115	Up
W8QRJ0_C231_M1	Q9Y4K0;W6I206;W8QRJ0	LOXL2	Lysyl oxidase homolog 2;Lysyl oxidase homolog;Lysyl oxidase homolog (Fragment)	W8QRJ0	1	KNSRVVCGMFGFP	Carbamidomethyl (C)	C	231	AKNSRVVCGMFGFPG							66341.3	76988.8	59401.2	26241.4	24939.6	24345.1	0.00118231	2.68426	1.42452	0.0194115	Up
X5D2U3_C63_M1	A0A8V8TKT5;Q9UEW8;X5D2U3;X5D7P8;X5DP03	STK39	non-specific serine/threonine protein kinase;STE20/SPS1-related proline-alanine-rich protein kinase;non-specific serine/threonine protein kinase (Fragment);non-specific serine/threonine protein kinase (Fragment);non-specific serine/threonine protein kinase (Fragment)	X5D2U3	1	VVQAALCKPRQER	Carbamidomethyl (C)	C	63	AVVQAALCKPRQERV				1	1	1	4576.34	7264.12	5673.16	380.476	548.383	692.256	0.00251887	10.8034	3.43342	0.028769	Up
X5D7P8_C67_M1	A0A8V8TKT5;Q9UEW8;X5D2U3;X5D7P8;X5DP03	STK39	non-specific serine/threonine protein kinase;STE20/SPS1-related proline-alanine-rich protein kinase;non-specific serine/threonine protein kinase (Fragment);non-specific serine/threonine protein kinase (Fragment);non-specific serine/threonine protein kinase (Fragment)	X5D7P8	1	VVQAALCKPRQER	Carbamidomethyl (C)	C	67	AVVQAALCKPRQERV				1	1	1	4576.34	7264.12	5673.16	380.476	548.383	692.256	0.00251887	10.8034	3.43342	0.028769	Up
X5DP03_C60_M1	A0A8V8TKT5;Q9UEW8;X5D2U3;X5D7P8;X5DP03	STK39	non-specific serine/threonine protein kinase;STE20/SPS1-related proline-alanine-rich protein kinase;non-specific serine/threonine protein kinase (Fragment);non-specific serine/threonine protein kinase (Fragment);non-specific serine/threonine protein kinase (Fragment)	X5DP03	1	VVQAALCKPRQER	Carbamidomethyl (C)	C	60	AVVQAALCKPRQERV				1	1	1	4576.34	7264.12	5673.16	380.476	548.383	692.256	0.00251887	10.8034	3.43342	0.028769	Up
