# Supplementary material for: Glucose Deprivation-Mediated Disulfide Stress Induces Cell Death in FHdeficient Renal Cell Carcinoma
Source: Research Square preprint supplement (doi:10.21203/rs.3.rs-5880350/v1), 2025-02-17
Supplement: Supplementary file 3 [file 55d4e5adcc3cc0bcf117b2a1.xlsx]

## Sheet: Sheet 1
Table S2. 200 metabolism-related compounds library screening（Compounds group vs DMSO group）
Compounds			Target			Solution	1#	2#	3#	Fold change	p-value
Pentamidine isethionate			Parasite；Fungal；Phosphatase；Bacterial；Antibiotic			in 10 mM DMSO	0.851033	0.98701	1.15964	0.999229	0.996591
Ketoconazole			Fungal；Cytochrome P450；Ras			in 10 mM DMSO	0.664034	0.836916	0.752869	0.751273	0.142022
Tetramisole hydrochloride			Parasite；Phosphatase；Antibiotic			in 10 mM DMSO	0.892148	1.0022	1.10144	0.998596	0.992428
MPTP hydrochloride			Dopamine Receptor；Apoptosis			in 10 mM DMSO	0.891323	0.99023	1.00171	0.961086	0.743093
Tacrolimus (FK506)			Phosphatase；FKBP；Bacterial；Autophagy；Antibiotic			in 10 mM DMSO	0.763354	1.0003	0.990973	0.91821	0.623571
Tacrolimus monohydrate			Phosphatase；FKBP；Autophagy；Bacterial；Antibiotic			in 10 mM DMSO	0.828742	1.0642	0.941437	0.944795	0.68856
Resveratrol			Pregnane X receptor (PXR)；IKK；Autophagy；Mitophagy；Sirtuin；Apoptosis；Bacterial；Fungal；Antibiotic；Keap1-Nrf2			in 10 mM DMSO	0.801745	1.04299	1.19572	1.01348	0.948512
Quercetin			PI3K；Autophagy；Mitophagy；Reactive Oxygen Species；Apoptosis			in 10 mM DMSO	0.824449	1.08295	1.22454	1.04398	0.836075
Gallic acid			COX；Reactive Oxygen Species；Apoptosis；Ferroptosis；Endogenous Metabolite			in 10 mM DMSO	0.793158	1.04827	1.01343	0.95162	0.766712
Rotenone (Barbasco)			Mitochondrial Metabolism；Autophagy；Apoptosis			in 10 mM DMSO	0.202108	0.205493	0.190797	0.199466	0.00702139
D-erythro-Sphingosine			PKC；Phosphatase；Endogenous Metabolite			in 10 mM DMSO	0.848969	1.06685	1.02136	0.979057	0.885153
Acefylline			Adenosine Receptor；Protein Arginine Deiminase；Phosphodiesterase (PDE)			in 10 mM DMSO	0.907092	0.995514	1.06784	0.990148	0.940598
Dyphylline			Adenosine Receptor；Phosphodiesterase (PDE)			in 10 mM DMSO	0.889672	1.1144	1.12827	1.04411	0.788048
Icariin			Phosphodiesterase (PDE)；PPAR；Autophagy			in 10 mM DMSO	0.802158	0.958114	1.07031	0.943529	0.739872
Isoliquiritigenin			Aldose Reductase；Influenza Virus；Autophagy；Apoptosis			in 10 mM DMSO	0.488758	0.596747	0.579657	0.555054	0.0461599
Acarbose			Glucosidase			in 10 mM DMSO	0.905193	1.01417	0.941767	0.953711	0.646371
Ellagic acid dihydrate			Casein Kinase；Reactive Oxygen Species；Endogenous Metabolite；SHP2			in 10 mM DMSO	0.687233	1.08732	0.957041	0.910532	0.656108
Lutein			Apoptosis；Endogenous Metabolite；Reactive Oxygen Species			in 10 mM DMSO	0.699865	0.983213	0.918485	0.867188	0.458267
Hexylresorcinol			Parasite；Bacterial；Apoptosis；Glucosidase			in 10 mM DMSO	0.834521	1.19663	1.0112	1.01412	0.934445
4-Methylesculetin			Glutathione Peroxidase			in 10 mM DMSO	0.908248	1.14024	1.08914	1.04588	0.760561
Cedryl acetate			Glucosidase			in 10 mM DMSO	0.885626	0.921292	1.00889	0.938603	0.622792
Daphnetin			Akt；AMPK；Apoptosis；Autophagy；Bcl-2 Family；Caspase；EGFR；mTOR；Parasite；PARP；PKA；PKC；Reactive Oxygen Species			in 10 mM DMSO	0.809671	1.06503	1.08187	0.985524	0.93384
Hypericin			Apoptosis；Influenza Virus；Antibiotic；Monoamine Oxidase；PKC；Cytochrome P450；Dopamine β-hydroxylase；Reverse Transcriptase；Telomerase			in 10 mM DMSO	0.641412	0.368385	1.03242	0.680739	0.316509
Sinapinic acid			HDAC；Angiotensin-converting Enzyme (ACE)；Reactive Oxygen Species；Apoptosis			in 10 mM DMSO	0.851281	1.03267	1.01558	0.966508	0.810284
Rebaudioside A			Endogenous Metabolite；Glucosidase			in 10 mM DMSO	0.945483	0.994441	1.03779	0.99257	0.946074
3,4-Dimethoxycinnamic acid			Reactive Oxygen Species；Virus Protease			in 10 mM DMSO	0.941602	1.16476	0.860198	0.988854	0.921135
Silydianin			Phosphatase；Endogenous Metabolite			in 10 mM DMSO	0.818092	1.09351	0.992542	0.968049	0.836366
Prunin			Phosphatase；Enterovirus			in 10 mM DMSO	0.999229	1.08699	1.18516	1.09046	0.542519
N-Caffeoyl O-methyltyramine			Glucosidase			in 10 mM DMSO	0.874233	1.07634	1.14074	1.03044	0.857338
Simvastatin acid ammonium			HMG-CoA Reductase (HMGCR)；Reactive Oxygen Species			in 10 mM DMSO	0.976938	1.16509	1.21975	1.12059	0.486387
Roxadustat (FG-4592)			HIF/HIF Prolyl-Hydroxylase；Ferroptosis			in 10 mM DMSO	0.790599	1.06478	1.08658	0.980653	0.915648
Daporinad (FK866, APO866)			NAMPT；Autophagy			in 10 mM DMSO	0.214327	0.298786	0.291934	0.268349	0.0161922
Epalrestat			Aldose Reductase			in 10 mM DMSO	0.784902	0.9757	1.03663	0.93241	0.686775
Letrozole			Cytochrome P450；Autophagy			in 10 mM DMSO	0.924677	0.993368	0.890084	0.936043	0.440558
Memantine hydrochloride			Cytochrome P450；iGluR；Autophagy			in 10 mM DMSO	0.852107	0.973223	1.06032	0.961885	0.798281
BAY 87-2243			HIF/HIF Prolyl-Hydroxylase；Ferroptosis			in 10 mM DMSO	0.162149	0.151911	0.156947	0.157003	0.00666998
Acetazolamide			Carbonic Anhydrase			in 10 mM DMSO	1.17368	1.2512	0.956628	1.12717	0.178163
Apremilast (CC-10004)			Phosphodiesterase (PDE)；TNF Receptor			in 10 mM DMSO	0.943749	1.3208	1.00402	1.08952	0.600329
Sildenafil citrate			Phosphodiesterase (PDE)；Autophagy；Apoptosis			in 10 mM DMSO	0.962655	1.19399	1.18268	1.11311	0.504129
Abiraterone Acetate			Cytochrome P450			in 10 mM DMSO	0.772931	0.745686	0.885626	0.801415	0.204385
Lonidamine			Hexokinase；Mitochondrial Metabolism；Apoptosis			in 10 mM DMSO	0.874563	1.04538	1.10986	1.00993	0.949767
Ibudilast			Phosphodiesterase (PDE)			in 10 mM DMSO	0.923439	1.17269	1.0164	1.03751	0.781592
Zonisamide			Carbonic Anhydrase；Calcium Channel；Sodium Channel；Apoptosis			in 10 mM DMSO	0.850373	1.01715	0.945317	0.937612	0.614946
Roflumilast			Phosphodiesterase (PDE)；RSV			in 10 mM DMSO	0.852024	1.07791	1.05991	0.996615	0.982503
Fenofibrate			Autophagy；Cytochrome P450；PPAR			in 10 mM DMSO	0.247764	0.246938	0.259983	0.251562	0.00968897
Cilostazol			Phosphodiesterase (PDE)；Autophagy			in 10 mM DMSO	0.96604	1.20365	1.04117	1.07029	0.599708
Dorzolamide hydrochloride			Carbonic Anhydrase			in 10 mM DMSO	0.925916	1.07948	1.05083	1.01874	0.881334
Stiripentol			Cytochrome P450			in 10 mM DMSO	0.976856	1.18656	1.10045	1.08795	0.530983
Vardenafil hydrochloride trihydrate			Phosphodiesterase (PDE)；Endogenous Metabolite			in 10 mM DMSO	1.06313	1.246	1.34161	1.21691	0.289033
Vardenafil hydrochloride			Phosphodiesterase (PDE)；Endogenous Metabolite			in 10 mM DMSO	0.823788	1.09888	1.0268	0.983158	0.916149
Dipyridamole			Phosphodiesterase (PDE)；Apoptosis			in 10 mM DMSO	0.970168	1.09467	1.06239	1.04241	0.714498
Aminophylline			Phosphodiesterase (PDE)；Adenosine Receptor			in 10 mM DMSO	0.901973	1.10771	1.09095	1.03355	0.821181
Atovaquone			Parasite；Cytochrome P450；Antibiotic			in 10 mM DMSO	0.852602	1.00195	0.979745	0.944767	0.668195
Brinzolamide			Carbonic Anhydrase			in 10 mM DMSO	0.89735	1.02763	0.990478	0.971819	0.807147
Clobetasol propionate			Cytochrome P450			in 10 mM DMSO	0.9757	1.17046	1.09805	1.0814	0.551976
Dichlorphenamide			Carbonic Anhydrase			in 10 mM DMSO	0.899166	1.06891	0.953656	0.973911	0.815874
Doxepin hydrochloride			Histamine Receptor；Cytochrome P450			in 10 mM DMSO	0.886452	1.11919	1.0434	1.01635	0.909189
Meclizine dihydrochloride			Histamine Receptor；Constitutive androstane receptor (CAR)；Apoptosis			in 10 mM DMSO	0.795883	1.00773	0.868123	0.89058	0.419528
Methazolamide			Carbonic Anhydrase			in 10 mM DMSO	1.03638	1.15502	1.18788	1.12643	0.387062
Metyrapone			Autophagy；Cytochrome P450；Endogenous Metabolite			in 10 mM DMSO	0.926163	1.09401	1.16501	1.06173	0.703322
Lipoic acid			Mitochondrial Metabolism；Endogenous Metabolite；Reactive Oxygen Species			in 10 mM DMSO	0.841209	1.02078	1.10433	0.988772	0.946231
Crisaborole			Phosphodiesterase (PDE)			in 10 mM DMSO	0.878113	1.10359	1.22586	1.06919	0.726232
Ranitidine			Histamine Receptor；Bacterial；Cytochrome P450			in 10 mM DMSO	0.916669	1.02226	1.16245	1.03379	0.833727
Clopidogrel hydrogen sulfate			Cytochrome P450；P2Y Receptor			in 10 mM DMSO	0.871591	1.01492	1.24097	1.04249	0.833396
Theophylline			Adenosine Receptor；Apoptosis；Endogenous Metabolite；HDAC；Interleukin Related；Phosphodiesterase (PDE)；TNF Receptor			in 10 mM DMSO	0.914522	1.03357	1.16633	1.03814	0.815101
Castanospermine			Glucosidase			in 10 mM DMSO	0.861849	1.02771	1.11201	1.00052	0.997423
SHP099 hydrochloride			SHP2；Phosphatase			in 10 mM DMSO	1.39651	1.10656	1.23172	1.24493	0.0787283
Topiroxostat			Xanthine Oxidase；Cytochrome P450			in 10 mM DMSO	1.19127	1.1471	1.05	1.12945	0.053105
Fomepizole			Cytochrome P450			in 10 mM DMSO	0.834934	1.13042	1.13777	1.03437	0.854389
(E/Z)-Teriflunomide			Dihydroorotate Dehydrogenase (DHODH)			in 10 mM DMSO	0.915183	0.982635	1.04744	0.981754	0.882267
Allylthiourea			Reactive Oxygen Species			in 10 mM DMSO	0.791425	1.0595	1.09905	0.983323	0.928229
Enarodustat			HIF/HIF Prolyl-Hydroxylase			in 10 mM DMSO	0.958527	1.25723	1.29009	1.16862	0.430533
Kresoxim-methyl			Fungal；Mitochondrial Metabolism			in 10 mM DMSO	0.825357	1.17583	1.12365	1.04161	0.829882
Perhexiline maleate			Mitochondrial Metabolism；Apoptosis			in 10 mM DMSO	0.538377	0.675427	0.793819	0.669208	0.149104
Fipronil			GABA Receptor；Cytochrome P450			in 10 mM DMSO	0.176184	0.185844	0.178661	0.18023	0.00750164
Thiabendazole			Mitochondrial Metabolism；Parasite			in 10 mM DMSO	0.151581	0.154471	0.363101	0.223051	0.0293586
Idoxuridine			HSV；Orthopoxvirus；Phosphatase			in 10 mM DMSO	1.14718	1.05232	1.20464	1.13471	0.297687
Uniconazole			Cytochrome P450；ROS Kinase			in 10 mM DMSO	1.11176	1.16831	1.00278	1.09428	0.221606
3-Indoleacrylic acid			Reactive Oxygen Species			in 10 mM DMSO	1.24914	1.15213	1.29537	1.23222	0.130161
CPI-613			lipoic acid			in 10 mM DMSO	0.839557	0.997083	1.01112	0.949253	0.718855
PKM2-IN			Pyruvate Kinase			in 10 mM DMSO	0.20087	0.225225	0.247021	0.224372	0.0115168
LDH-IN1			Lactate Dehydrogenase			in 10 mM DMSO	0.85673	1.27217	1.4756	1.2015	0.507458
MDH-IN1			Malate Dehydrogenase			in 10 mM DMSO	0.590307	1.10681	1.28604	0.994386	0.985681
R162			GDH1/GLUD1			in 10 mM DMSO	0.801249	1.17773	1.38049	1.11982	0.666594
G6PI			Glucose-6-phosphate dehydrogenase			in 10 mM DMSO	1.26978	1.30933	1.25616	1.27842	0.0554352
Antimycin A			Mitochrodria Complex III			in 10 mM Ethanol	0.163387	0.158103	0.160085	0.160525	0.00682363
Clozapine N-oxide			mAChR；Dopamine Receptor；Drug Metabolite			in 10 mM DMSO	0.41305	0.646036	0.68616	0.581749	0.111641
Docetaxel (RP56976)			Microtubule/Tubulin；Apoptosis；Endogenous Metabolite			in 10 mM DMSO	0.463825	0.655943	0.658998	0.592922	0.0895718
Valproic acid sodium			HDAC；Autophagy；Mitophagy；HIV；Notch；Endogenous Metabolite			in 10 mM DMSO	0.629606	0.699287	0.67972	0.669538	0.0620163
Tauroursodeoxycholic Acid (TUDCA)			ERK；Caspase；Endogenous Metabolite；Apoptosis			in 10 mM DMSO	0.68195	1.09013	0.959353	0.910477	0.660459
Melatonin			Melatonin Receptor；Autophagy；Mitophagy；Endogenous Metabolite；Apoptosis			in 10 mM DMSO	0.51559	0.702259	0.661887	0.626579	0.0882917
Dimethyl Fumarate			Keap1-Nrf2；Reactive Oxygen Species；HIV；Autophagy；Endogenous Metabolite			in 10 mM DMSO	0.466797	0.492308	0.684674	0.547926	0.0802752
Butein			EGFR；Autophagy；Apoptosis；Phosphodiesterase (PDE)			in 10 mM DMSO	0.470512	0.45334	0.546138	0.489996	0.0325353
Kaempferol			Estrogen Receptor (ER)/ERR；Autophagy；Mitophagy；Apoptosis；Endogenous Metabolite			in 10 mM DMSO	0.764923	0.616644	0.772023	0.717863	0.0862175
Cordycepin			MMP；Bacterial；Autophagy；Antibiotic			in 10 mM DMSO	0.191128	0.17057	0.155379	0.172359	0.0052718
Luteolin			Keap1-Nrf2；Apoptosis；Autophagy；Endogenous Metabolite；ADC Cytotoxin			in 10 mM DMSO	0.563475	0.762941	0.74387	0.690095	0.136434
Nordihydroguaiaretic acid			Lipoxygenase；Autophagy；Ferroptosis			in 10 mM DMSO	0.396208	0.583042	0.646449	0.541899	0.0865642
Astragaloside IV			MMP；ERK；JNK			in 10 mM DMSO	0.566943	1.02813	0.921953	0.839007	0.499995
Apigenin-7-glucuronide			MMP			in 10 mM DMSO	0.417673	0.552825	0.610287	0.526928	0.0650054
Isorhamnetin			MEK；PI3K；Endogenous Metabolite			in 10 mM DMSO	0.691196	1.06495	1.06949	0.941877	0.7886
Tetrac			Integrin；Endogenous Metabolite			in 10 mM DMSO	0.404134	0.601453	0.609461	0.538349	0.074556
Phthalic acid mono-2-ethylhexyl ester			Endogenous Metabolite			in 10 mM DMSO	0.599141	0.60071	0.744695	0.648182	0.0925331
Tamoxifen Citrate			Estrogen Receptor (ER)/ERR；HSP；Autophagy；Apoptosis			in 10 mM DMSO	0.235215	0.237196	0.295154	0.255855	0.013838
PT-2385			HIF/HIF Prolyl-Hydroxylase			in 10 mM DMSO	0.564218	0.527974	0.616727	0.56964	0.0396451
Enasidenib (AG-221)			Isocitrate Dehydrogenase (IDH)			in 10 mM DMSO	0.709525	0.713818	0.837659	0.753667	0.15338
Ilomastat (GM6001, Galardin)			MMP			in 10 mM DMSO	0.38275	0.45689	0.531607	0.457082	0.0411098
Simvastatin			HMG-CoA Reductase (HMGCR)；Autophagy；Mitophagy；Apoptosis；Ferroptosis			in 10 mM DMSO	0.386796	0.433277	0.568429	0.462834	0.0493608
Atorvastatin Calcium			HMG-CoA Reductase (HMGCR)；Autophagy；Ferroptosis			in 10 mM DMSO	0.540771	0.721331	0.889589	0.71723	0.240673
Luminespib			HSP；Autophagy；Apoptosis			in 10 mM DMSO	0.736439	0.869692	1.02903	0.878388	0.515282
Ivosidenib (AG-120)			Isocitrate Dehydrogenase (IDH)			in 10 mM DMSO	0.403638	0.565126	0.605746	0.524837	0.0678603
UK 5099			Mitochondrial Metabolism			in 10 mM DMSO	0.423453	0.5056	0.587996	0.505683	0.05265
Marimastat (BB2516)			MMP			in 10 mM DMSO	0.386135	0.54234	0.513278	0.480585	0.0432265
LW 6			HIF/HIF Prolyl-Hydroxylase；Apoptosis			in 10 mM DMSO	0.451441	0.466714	0.558769	0.492308	0.0383927
KPT 9274 (ATG-019)			PAK；NAMPT			in 10 mM DMSO	1.11597	1.17062	1.31791	1.2015	0.260966
Gboxin			ATP Synthase；Mitochondrial Metabolism；Oxidative Phosphorylation			in 10 mM DMSO	0.15992	0.152654	0.155379	0.155984	0.00668481
Meclofenamic acid sodium			Dynamin			in 10 mM DMSO	1.4444	1.04678	1.26681	1.25266	0.137734
Eplerenone			Mineralocorticoid receptor (MR)；Endogenous Metabolite			in 10 mM DMSO	1.28027	1.03308	1.55156	1.2883	0.279611
Ethacrynic acid			Gutathione S-transferase；NF-κB；Calcium Channel；NO Synthase			in 10 mM DMSO	0.578914	0.496271	0.605994	0.560393	0.0352777
Fenbendazole			Antibiotic；HIF/HIF Prolyl-Hydroxylase；Microtubule/Tubulin；Parasite			in 10 mM DMSO	1.06561	0.83287	1.27539	1.05796	0.769468
Carbenoxolone disodium			Gap Junction Protein；Orthopoxvirus；11β-HSD			in 10 mM DMSO	1.17087	1.27259	1.62314	1.35553	0.225707
AG-120 (racemic)			Isocitrate Dehydrogenase (IDH)			in 10 mM DMSO	0.660829	0.588821	0.756433	0.668694	0.0851935
HA15			HSP；Autophagy；Apoptosis			in 10 mM DMSO	0.245883	0.268257	0.262148	0.258762	0.0312683
MI-2 (MALT1 inhibitor)			MALT1			in 10 mM DMSO	0.495507	0.408838	0.523227	0.475857	0.0510792
IOX2			HIF/HIF Prolyl-Hydroxylase			in 10 mM DMSO	0.715122	0.489933	0.838293	0.681116	0.10148
IDO-IN-2			Indoleamine 2，3-Dioxygenase (IDO)			in 10 mM DMSO	0.35989	0.265737	0.362563	0.329396	0.0358736
Finerenone			Mineralocorticoid receptor (MR)			in 10 mM DMSO	0.878	0.669916	1.10693	0.884949	0.342444
Mitochonic acid 5			Mitochondrial Metabolism			in 10 mM DMSO	0.79805	0.571639	0.943747	0.771146	0.165406
NSC 405020			MMP			in 10 mM DMSO	0.692901	0.488482	0.735358	0.638914	0.100053
Edaravone			MMP；Apoptosis			in 10 mM DMSO	1.04454	0.792781	1.04943	0.962252	0.808642
Topiramate			iGluR；GABA Receptor；Sodium Channel；Calcium Channel；Potassium Channel；Carbonic Anhydrase			in 10 mM DMSO	0.777738	0.573701	0.991549	0.780996	0.144324
3-Bromopyruvic acid			Hexokinase；Apoptosis；Autophagy			in 10 mM DMSO	0.864943	0.745361	1.09868	0.902996	0.320852
Spironolactone			Mineralocorticoid receptor (MR)；Androgen Receptor (AR)；Autophagy			in 10 mM DMSO	1.03928	0.696414	1.07684	0.937511	0.70724
Daprodustat (GSK1278863)			HIF/HIF Prolyl-Hydroxylase			in 10 mM DMSO	1.0573	0.649146	1.10357	0.936671	0.724831
Benzamide			Endogenous Metabolite；PARP			in 10 mM DMSO	1.0253	0.727722	0.958027	0.903683	0.603558
(-)-(S)-Equol			Estrogen Receptor (ER)/ERR；Endogenous Metabolite			in 10 mM DMSO	0.870059	0.743757	0.809275	0.807697	0.325479
AGI-6780			Isocitrate Dehydrogenase (IDH)			in 10 mM DMSO	0.439153	0.456792	0.74979	0.548578	0.00841937
Oleoylethanolamide			Endogenous Metabolite；PPAR			in 10 mM DMSO	1.0489	0.794003	1.04653	0.963143	0.815511
GSK2033			Liver X Receptor (LXR)			in 10 mM DMSO	0.808817	0.60646	0.93214	0.782473	0.177917
ER-000444793			Mitochondrial Metabolism			in 10 mM DMSO	1.11625	0.732074	1.02568	0.958001	0.830821
Sodium thiocyanate			Interleukin Related；Reactive Oxygen Species			in 10 mM DMSO	0.880062	0.702828	0.91389	0.83226	0.307686
Norharmane			Monoamine Oxidase；Endogenous Metabolite			in 10 mM DMSO	0.786367	0.713977	0.886095	0.795479	0.183444
N-Acetyl-5-hydroxytryptamine			Endogenous Metabolite；Trk Receptor			in 10 mM DMSO	0.802556	0.682439	0.870975	0.785323	0.194807
Ampyrone			COX；Drug Metabolite			in 10 mM DMSO	0.886706	0.60478	0.684883	0.725456	0.285898
Tauroursodeoxycholate sodium			Apoptosis；Caspase；Endogenous Metabolite；ERK			in 10 mM DMSO	1.4404	1.04416	1.07891	1.18782	0.511828
Gramine			Adiponectin Receptor；Adrenergic Receptor；Reverse Transcriptase；ADC Cytotoxin			in 10 mM DMSO	0.462519	0.440986	0.387151	0.430219	0.0702631
(+)-Catechin			COX；Apoptosis；Influenza Virus；Endogenous Metabolite			in 10 mM DMSO	1.4362	0.961845	1.28821	1.22875	0.365382
Apocynin			Autophagy；Apoptosis；NADPH Oxidase			in 10 mM DMSO	1.18841	0.825769	1.17321	1.06246	0.727774
Cucurbitacin B			Apoptosis；Autophagy；COX；Endogenous Metabolite；Integrin；ROS Kinase			in 10 mM DMSO	1.05974	0.704508	1.01614	0.926795	0.692154
Rhapontigenin			Cytochrome P450；Fungal；Bacterial			in 10 mM DMSO	1.23743	0.927864	1.06486	1.07672	0.717172
Albendazole (SKF-62979)			Antibiotic；Apoptosis；Autophagy；HIF/HIF Prolyl-Hydroxylase；Microtubule/Tubulin；Parasite；Reactive Oxygen Species；VEGFR；ADC Cytotoxin			in 10 mM DMSO	1.16206	0.940006	1.22705	1.10971	0.459197
Ginsenoside C-K			COX；NO Synthase；Cytochrome P450			in 10 mM DMSO	1.22659	0.996971	1.36816	1.19724	0.209377
Taxifolin			Autophagy；Tyrosinase			in 10 mM DMSO	0.459923	0.421972	0.436022	0.439306	0.0582501
Apigenin			Autophagy；Cytochrome P450；Endogenous Metabolite			in 10 mM DMSO	0.621503	0.407463	0.51307	0.514012	0.0963025
Quercitrin			Apoptosis；Autophagy；Reactive Oxygen Species；Ribosomal S6 Kinase (RSK)			in 10 mM DMSO	1.49668	0.997047	1.37641	1.29005	0.278212
Schisandrin A			Cytochrome P450；Adiponectin Receptor；Virus Protease			in 10 mM DMSO	1.06104	0.710617	0.743681	0.838445	0.545447
Guaiacol			COX；NF-κB；Endogenous Metabolite			in 10 mM DMSO	1.26355	0.907934	1.18742	1.11963	0.546647
Lithocholic acid			Apoptosis；Autophagy；Endogenous Metabolite；FXR			in 10 mM DMSO	1.11693	0.875404	1.10082	1.03105	0.84578
Azelaic acid			Antibiotic；Endogenous Metabolite			in 10 mM DMSO	1.16489	0.974521	1.1419	1.09377	0.569361
(-)-Epicatechin			COX；Ferroptosis；Endogenous Metabolite			in 10 mM DMSO	1.27386	1.01079	1.19268	1.15911	0.42008
Galangin			Cytochrome P450；Autophagy			in 10 mM DMSO	1.24805	0.966121	1.30341	1.17253	0.318361
Ginkgolide C			AMPK；Sirtuin；MMP；Endogenous Metabolite			in 10 mM DMSO	1.06043	0.974139	1.23552	1.09003	0.388246
Poliumoside			Aldose Reductase			in 10 mM DMSO	1.139	0.977575	1.07448	1.06369	0.711887
Cedrol			Cytochrome P450；Fungal			in 10 mM DMSO	1.06547	0.989106	1.25965	1.10474	0.306351
Anacetrapib (MK-0859)			CETP			in 10 mM DMSO	1.30173	0.966503	0.974139	1.08079	0.755132
AdipoRon			Adiponectin Receptor			in 10 mM DMSO	1.29692	1.02377	0.995215	1.1053	0.676936
BMS303141			ATP Citrate Lyase			in 10 mM DMSO	1.2214	0.923435	1.03973	1.06152	0.771858
NDI-091143			ATP Citrate Lyase			in 10 mM DMSO	1.20872	0.944282	1.21002	1.12101	0.476036
Avasimibe			Acyltransferase			in 10 mM DMSO	1.26233	0.981164	1.27157	1.17169	0.343511
Firsocostat (GS-0976)			Acetyl-CoA Carboxylase			in 10 mM DMSO	1.20322	0.972994	1.24835	1.14152	0.377469
Calpeptin			Cathepsin；Proteasome；Apoptosis			in 10 mM DMSO	1.0812	0.928399	1.28035	1.09665	0.375313
E 64c			Cathepsin；SARS-CoV			in 10 mM DMSO	1.2204	1.04096	1.10235	1.12124	0.539193
Phenidone			COX；Lipoxygenase			in 10 mM DMSO	1.18436	1.03691	1.484	1.23509	0.0853541
opicapone			COMT			in 10 mM DMSO	1.15099	0.909919	1.14213	1.06768	0.674343
Mitoxantrone dihydrochloride			Apoptosis；Endogenous Metabolite；Orthopoxvirus；PKC；Topoisomerase			in 10 mM DMSO	1.07692	0.962914	1.05989	1.03324	0.829751
5-Iodotubercidin			Adenosine Kinase			in 10 mM DMSO	1.21788	0.935806	1.21124	1.12164	0.484163
SW033291			15-PGDH			in 10 mM DMSO	1.18268	1.0253	1.31662	1.17487	0.217739
Psoralidin			COX；Lipoxygenase；Notch；Reactive Oxygen Species；Bacterial			in 10 mM DMSO	1.18299	0.984295	1.07287	1.08005	0.6719
Sodium Salicylate			Apoptosis；Autophagy；COX；Endogenous Metabolite；NF-κB；Ribosomal S6 Kinase (RSK)			in 10 mM DMSO	1.15725	1.16084	1.31402	1.21071	0.136948
Finasteride (MK-906)			5α-reductase			in 10 mM DMSO	1.1403	1.1542	1.3212	1.20523	0.124877
Perindopril erbumine			Angiotensin-converting Enzyme (ACE)；Apoptosis			in 10 mM DMSO	1.15802	1.00896	1.348	1.17166	0.185226
Win 18446			Aldehyde Dehydrogenase (ALDH)			in 10 mM DMSO	1.13977	1.14404	1.28554	1.18978	0.171502
Cystamine dihydrochloride			Caspase；Glutaminase；Apoptosis			in 10 mM DMSO	1.12915	1.20513	1.41764	1.25064	0.0389816
AA147			ATF6；Reactive Oxygen Species			in 10 mM DMSO	1.02064	1.16153	1.39359	1.19192	0.0309172
Ellagic acid			Casein Kinase；Endogenous Metabolite；Reactive Oxygen Species；SHP2			in 10 mM DMSO	1.05997	1.23224	1.31677	1.20299	0.124755
Cytarabine			Apoptosis；Autophagy；DNA/RNA Synthesis；Endogenous Metabolite；HSV；Nucleoside Antimetabolite/Analog；Orthopoxvirus			in 10 mM DMSO	1.03088	1.24957	1.30219	1.19421	0.153295
Berberine chloride			Topoisomerase；Autophagy；Bacterial；Reactive Oxygen Species；Antibiotic			in 10 mM DMSO	0.285285	0.34897	0.374017	0.336091	0.0289342
Adenine hydrochloride			DNA/RNA Synthesis；Endogenous Metabolite			in 10 mM DMSO	1.02652	1.2004	1.23629	1.1544	0.24547
Atranorin			Ras；Endogenous Metabolite			in 10 mM DMSO	0.945885	1.07348	1.26515	1.09484	0.193014
Alpha-mangostin			Reactive Oxygen Species；Apoptosis；Bacterial；Fungal；Virus Protease			in 10 mM DMSO	0.755975	0.908239	0.990938	0.885051	0.296
Ginsenoside Re			β-Amyloid；NF-κB；JNK；Endogenous Metabolite			in 10 mM DMSO	0.965663	1.17245	1.20788	1.11533	0.337971
5-Methylcytosine			DNA/RNA Synthesis；Endogenous Metabolite			in 10 mM DMSO	1.04813	0.614402	1.4462	1.03625	0.851802
Neoruscogenin			ROR			in 10 mM DMSO	0.959936	0.924733	1.13778	1.00748	0.933745
3-TYP			Indoleamine 2,3-Dioxygenase (IDO)；Methionine Adenosyltransferase (MAT)；Sirtuin			in 10 mM DMSO	1.00064	0.952911	1.17688	1.04347	0.642411
CTPI-2			Mitochondrial Metabolism			in 10 mM DMSO	0.955965	0.922443	1.3409	1.0731	0.209038
Diaveridine			Antifolate；Bacterial；Dihydrofolate reductase (DHFR)			in 10 mM DMSO	1.09342	1.00453	1.27515	1.12437	0.264012
6-Mercaptopurine			Nucleoside Antimetabolite/Analog；Autophagy；Endogenous Metabolite			in 10 mM DMSO	0.903123	0.926337	1.2175	1.01565	0.736193
GSK4112			REV-ERB；Autophagy			in 10 mM DMSO	0.889684	0.965052	1.10044	0.985059	0.863343
2-Methoxyestradiol (2-MeOE2)			Microtubule/Tubulin；Reactive Oxygen Species；Apoptosis；Autophagy；Endogenous Metabolite			in 10 mM DMSO	0.816301	0.83478	1.0744	0.908494	0.247598
Vinpocetine			Sodium Channel；IKK；Phosphodiesterase (PDE)			in 10 mM DMSO	0.898007	1.213	1.34373	1.15158	0.167751
Calceolarioside B			Aldose Reductase			in 10 mM DMSO	1.03737	1.16985	1.38664	1.19795	0.0389322
