# Supplementary material for: Glucose Deprivation-Mediated Disulfide Stress Induces Cell Death in FHdeficient Renal Cell Carcinoma
Source: Research Square preprint supplement (doi:10.21203/rs.3.rs-5880350/v1), 2025-02-17
Supplement: Supplementary file 5 [file c3ed247ef5929ebcfbce4291.xlsx]

## Sheet: Sheet 1
Table S4 ketogenic diet table
	gm%	Kcal%
Protein	0.1663	0.0999
Carbohydrate	0	0
Fat	0.665	0.8991
Total		100
Kcal/gm	6.7
Ingredient	gm	kcal
Casein	100	400
L-Cystine	1.5	6
Corn starch	0	0
Maltodextrin	0	0
Sucrose	0	0
Cellulose	50	0
Soybean Oil	25	115
Cocoa butter	381	3429
Mineral Mix S10026B	50	0
Vitamin Mix,V10001C,10×Vits	1	4
Choline Biartrate	2	0
FD&C Red Dye #40	0.025	0
FD&C Yellow Dye #5	0.025	0
FD&C Blue Dye #1	0	0
Total	610.5	4046
